# Supplementary material for: I feel addicted to watching TV series: association between binge-watching and mental health
Source: PeerJ. 2023 Aug 8;11:e15796. doi: 10.7717/peerj.15796 (PMC10416768; doi:10.7717/peerj.15796)
Supplement: Dataset S1 [file peerj-11-15796-s001.xlsx]

## Sheet: Dataset
COD_of_Participant	Age	Sex	Altezza	Peso (in Kg)	BMI	Stato Civile	Titolo di Studio	Anni di Scolarità	Attività Professionale	AttivitàFisica (Si/No)	Con chi vivi	Cinema (volte al mese)	Lettura (ore a settimana)	Musica (ore a settimana)	TV (ore/dì)	Fascia Oraria TV	TV durante i pasti	Addormentarsi alla TV	SERIE TV	SerieTV (ore/dì)	SpuntiniTV	SpuntiniSerieTV	PreferenzeSerieTV	SerieTV preferite	VisioneSerie	Iscrizione Piattaforma	Con chiguardiSerie?	FasciaOraria Serie	Durante i PastiSerie	Utlimo mese:Passare automaticamente all'episodio successivo della serie TV che stai guardando?	Ultima settimana:Passare automaticamente all'episodio successivo della serie TV che stai guardando?	Guardare ripetutamente vecchi episodi di una serie TV in attessa dell'uscita della nuova stagione	Scorsa settimana:per quanti giorni hai guardato più di due episodi della stessa serie TV in maniera consecutiva?	Ripensa all'ultima volta in cui hai guardato più episodi consecutivi della stessa serie TV, quanti ne hai guardati?	Ripensa all'ultima volta in cui hai guardato più episodi consecutivi della stessa serie TV, per quanto tempo sei rimasto a guardare la serie TV? (Ore)	Nella prossima settimana, per quanti giorni avrai intenzione di guardare più di due episodi consecutivi della stessa serie TV?	BWAQ_Craving	BWAQ_Dependency	BWAQ_Anticipation	BWAQ_Avoidance	BWAQ_Tot	BWAQ_Classification	TAS_F1	TAS_F2	TAS_F3	TAS_TOT	STAI	BDI_Total	LSAS_TOT
1	18	Female	1.72	72	24.3375	Single	Diploma	13	Studente/ssa	0	Genitori	1	0	40	0	Sera (18:00-00:00)	Si, in entrambi i pasti	Si	Si	5	Spesso	Spesso	Drama, Commedia, Biografiche, Documentaristiche, Fantascientifiche	Narcos, Bojack Horseman, Love, Stranger Things, Orange is the new black, Sherlock, Black mirror	Piattaforme On-Demand (Sky Online, Infinity, Netflix, Mediaset Premium, NowTV, TimVision), Streaming on-line	Si	Solo	Pomeriggio (13:00-18:00)	Si, solo a cena	Sempre	Sempre	Spesso	4	5	4	3	33	12	10	14	69	HIGH BW	28	24	19	71	75	25	111
2	18	Female	1.76	50	16.1415	Single	Licenza Media	8	Studente/ssa	0	Genitori	1	0	7	1	Pomeriggio (13:00-18:00), Sera (18:00-00:00)	Si, in entrambi i pasti	Si	Si	7/8	Sempre	Sempre	Drama, Avventura, Commedia, Fantascientifiche, Medical Drama, Crime, Musical	Legends of tomorrow, orange is the new black, black mirror, once upon a time, the 100, lucifer, mom....	Piattaforme On-Demand (Sky Online, Infinity, Netflix, Mediaset Premium, NowTV, TimVision), Streaming on-line	Si	Solo	Pomeriggio (13:00-18:00), Sera (18:00-00:00), Notte (00:00-6:00)	Si, in entrambi i pasti	Sempre	Sempre	Spesso	7	8	7	7	32	18	10	9	69	HIGH BW	19	8	14	41	68	27	15
3	18	Female	1.67	70	25.0995	Single	Licenza Media	8	Studente/ssa	1	Genitori	1	2	2	1	Sera (18:00-00:00)	No	No	Si	8	Raramente	Spesso	Avventura, Anime, Fantascientifiche, Horror, Crime, Serie Animate	The 100 Once upon a time Fucking it The handmaid's tale	Televisore, Streaming on-line	Si	Solo	Pomeriggio (13:00-18:00), Sera (18:00-00:00), Notte (00:00-6:00)	Si, in entrambi i pasti	Sempre	Sempre	Mai	7	5	5	7	32	20	10	9	71	HIGH BW	17	13	11	41	65	28	76
4	18	Female	1.65	53	19.4674	Single	Licenza Media	8	Studente/ssa	1	Genitori	1	40	300	2	Pomeriggio (13:00-18:00), Sera (18:00-00:00), Notte (00:00-6:00)	Si, in entrambi i pasti	No	Si	10	Qualche volta	Qualche volta	Drama, Avventura, Fantascientifiche	Once upon a Time, Riverdale, Teen Wolf	Televisore, Piattaforme On-Demand (Sky Online, Infinity, Netflix, Mediaset Premium, NowTV, TimVision), Streaming on-line	Si	Solo	Pomeriggio (13:00-18:00), Sera (18:00-00:00), Notte (00:00-6:00)	Si, in entrambi i pasti	Sempre	Sempre	Sempre	7	6	10	7	39	13	8	11	71	HIGH BW	14	21	12	47	51	16	105
5	18	Female	1.75	65	21.2245	Single	Diploma	13	Studente/ssa	1	Genitori	1	3	5	2	Sera (18:00-00:00)	Si, in entrambi i pasti	Si	Si	5	Spesso	Sempre	Crime	Chicago fire, riverdale e lucifer	Streaming on-line	No	Solo	Sera (18:00-00:00)	Si, solo a cena	Spesso	Spesso	Spesso	6	10+	10 ore	3	32	17	11	12	72	HIGH BW	9	12	26	47	73	33	32
6	18	Female	1.52	85	36.7902	Single	Licenza Media	15	Studente/ssa	0	Genitori	5	16	5	1	Pomeriggio (13:00-18:00), Sera (18:00-00:00)	No	Si	Si	6	Spesso	Spesso	Drama, Commedia, Biografiche, Fantascientifiche, Medical Drama, Crime	Friends, sense8, please like me	Piattaforme On-Demand (Sky Online, Infinity, Netflix, Mediaset Premium, NowTV, TimVision), Streaming on-line	Si	Solo	Mattina (6:00-13:00), Pomeriggio (13:00-18:00), Sera (18:00-00:00), Notte (00:00-6:00)	Si, in entrambi i pasti	Sempre	Sempre	Qualche Volta	7	10+	10	7	30	20	11	11	72	HIGH BW	33	20	24	77	70	48	72
7	18	Female	1.64	70	26.0262	Single	Licenza Media	8	Studente/ssa	1	Genitori	0	42	44	3	Pomeriggio (13:00-18:00)	Si, in entrambi i pasti	No	Si	7	Spesso	Sempre	Commedia	Riverdale Game of Thrones Una serie di sfortunati eventi	Piattaforme On-Demand (Sky Online, Infinity, Netflix, Mediaset Premium, NowTV, TimVision)	Si	Solo	Pomeriggio (13:00-18:00), Sera (18:00-00:00)	No	Sempre	Sempre	Spesso	7	6	7	7	35	13	11	13	72	HIGH BW	31	24	30	85	63	37	101
8	18	Female	1.72	70	23.6614	Single	Diploma	13	Studente/ssa	0	Genitori	1	10	13	3	Pomeriggio (13:00-18:00), Sera (18:00-00:00), Notte (00:00-6:00)	Si, in entrambi i pasti	No	Si	6/7 ore	Spesso	Spesso	Thriller, Drama, Avventura, Commedia, Biografiche, Fantascientifiche, Horror, Medical Drama, Crime	Black mirror,Touch,Shadowhunters	Piattaforme On-Demand (Sky Online, Infinity, Netflix, Mediaset Premium, NowTV, TimVision)	Si	Solo	Pomeriggio (13:00-18:00), Sera (18:00-00:00), Notte (00:00-6:00)	Si, in entrambi i pasti	Sempre	Sempre	Spesso	7	10+	8 ore	7	39	13	12	11	75	HIGH BW	10	5	16	31	47	3	73
9	18	Female	1.6	91	35.5469	Single	Diploma	13	Studente/ssa	0	Genitori	2	8	70	2	Sera (18:00-00:00)	No	No	Si	4/5	Spesso	Sempre	Drama, Commedia, Anime, Medical Drama	grey's anatomy, teen wolf, the vampire diaries	Piattaforme On-Demand (Sky Online, Infinity, Netflix, Mediaset Premium, NowTV, TimVision)	Si	Solo	Mattina (6:00-13:00), Pomeriggio (13:00-18:00), Sera (18:00-00:00), Notte (00:00-6:00)	Si, in entrambi i pasti	Sempre	Sempre	Spesso	4	5	5/6	4	36	18	8	13	75	HIGH BW	34	20	26	80	79	41	122
10	18	Female	1.63	55	20.7008	Single	Diploma	13	Studente/ssa	1	Genitori	3	10	20	1	Pomeriggio (13:00-18:00), Sera (18:00-00:00)	Si, in entrambi i pasti	No	Si	3	Spesso	Qualche volta	Thriller, Drama, Avventura, Commedia, Fantascientifiche, Horror, Serie Animate	Game of Thrones, Vikings, Shameless	Piattaforme On-Demand (Sky Online, Infinity, Netflix, Mediaset Premium, NowTV, TimVision), Streaming on-line	Si	Solo	Pomeriggio (13:00-18:00), Sera (18:00-00:00), Notte (00:00-6:00)	No	Qualche Volta	Qualche Volta	Quasi Mai	5	6	5	5	39	19	9	9	76	HIGH BW	30	21	29	80	75	42	104
11	18	Female	1.6	54	21.0937	Single	Diploma	13	Studente/ssa	1	Genitori	0	20	10	1	Pomeriggio (13:00-18:00)	Si, in entrambi i pasti	No	Si	8	Mai	Spesso	Thriller, Avventura, Commedia, Fantascientifiche, Horror, Crime, Serie Animate	Jane the Virgin, Once upon a time, Friends, How I met your mother, American Horror story	Piattaforme On-Demand (Sky Online, Infinity, Netflix, Mediaset Premium, NowTV, TimVision), Streaming on-line	Si	Solo	Pomeriggio (13:00-18:00), Sera (18:00-00:00)	Si, solo a cena	Sempre	Sempre	Quasi Mai	7	10+	7	7	39	15	11	11	76	HIGH BW	23	12	21	56	69	26	105
12	18	Female	1.7	58	20.0692	Single	Licenza Media	12	Studente/ssa	0	Genitori	1	4	8	3	Sera (18:00-00:00)	No	No	Si	6	Raramente	Raramente	Drama, Medical Drama, Crime	Grey s anatomy scandal	Piattaforme On-Demand (Sky Online, Infinity, Netflix, Mediaset Premium, NowTV, TimVision), Streaming on-line, Ipad	Si	Solo	Pomeriggio (13:00-18:00), Sera (18:00-00:00)	Si, solo a pranzo	Spesso	Spesso	Spesso	7	7	5	3	39	14	12	12	77	HIGH BW	24	10	25	59	73	44	106
13	18	Female	1.6	48	18.75	Single	Licenza Media	8	Studente/ssa	1	Genitori	3	4	7	1	Pomeriggio (13:00-18:00), Sera (18:00-00:00)	Si, in entrambi i pasti	No	Si	Almeno 2 ore	Spesso	Spesso	Thriller, Drama, Avventura, Commedia, Horror, Crime	Glee, the walking dead, how to get away with murder, once upon a time, shameless	Piattaforme On-Demand (Sky Online, Infinity, Netflix, Mediaset Premium, NowTV, TimVision), Streaming on-line	Si	Solo	Pomeriggio (13:00-18:00), Sera (18:00-00:00)	Si, in entrambi i pasti	Sempre	Sempre	Qualche Volta	6	10+	10	5	38	16	12	12	78	HIGH BW	25	15	23	63	67	43	31
14	18	Female	1.61	64	24.6904	Single	Diploma	16	Studente/ssa	0	Genitori	2	12	20	2	Sera (18:00-00:00)	Si, in entrambi i pasti	Si	Si	3	Spesso	Sempre	Thriller, Sovrannaturale	Game of Thrones, Empire, Teen Wolf	Televisore	No	Solo	Sera (18:00-00:00)	No	Qualche Volta	Spesso	Sempre	4	7	10	3	36	19	12	12	79	HIGH BW	28	20	28	76	74	38	108
15	18	Female	1.63	60	22.5827	Single	Licenza Media	8	Studente/ssa	1	Genitori	2	5	7	0	Notte (00:00-6:00)	No	Si	Si	4 ore o più	Qualche volta	Spesso	Avventura, Anime, Fantascientifiche, Horror, Crime	Teen Wolf, Riverdale, Breaking Bad, Once upon a time	Streaming on-line, netflix	No	Solo	Pomeriggio (13:00-18:00), Sera (18:00-00:00)	No	Spesso	Spesso	Sempre	6	10+	8	6	40	16	12	11	79	HIGH BW	35	24	33	92	67	27	50
16	18	Female	1.77	73	23.3011	Single	Diploma	16	Studente/ssa	1	Genitori	1	7	100	1	Pomeriggio (13:00-18:00), Sera (18:00-00:00)	Si, in entrambi i pasti	No	Si	6/7 ore	Qualche volta	Qualche volta	Thriller, Drama, Avventura, Commedia, Anime, Biografiche, Fantascientifiche, Horror, Musical, Serie Animate	teen wolf, vampire diaries, the originals, shameless, skam, American horror story, breaking bad, la casa di carta, stranger things, on my block..	Streaming on-line	No	Solo	Pomeriggio (13:00-18:00), Sera (18:00-00:00)	Si, in entrambi i pasti	Sempre	Sempre	Qualche Volta	7	10+	15 ore	7	38	17	10	15	80	HIGH BW	34	24	23	81	75	59	122
17	18	Female	1.67	63	22.5896	Single	Diploma	13	Studente/ssa	0	Genitori	1	30	12	1	Sera (18:00-00:00)	Si, solo a cena	Si	Si	8	Spesso	Sempre	Thriller, Drama, Commedia, Fantascientifiche, Horror, Crime	Shadowhunters, Teen Wolf, La casa di carta	Piattaforme On-Demand (Sky Online, Infinity, Netflix, Mediaset Premium, NowTV, TimVision)	Si	Solo	Mattina (6:00-13:00), Pomeriggio (13:00-18:00), Sera (18:00-00:00), Notte (00:00-6:00)	No	Spesso	Spesso	Mai	7	10+	15	7	38	19	10	15	82	HIGH BW	31	25	29	85	74	45	134
18	18	Female	1.58	56	22.4323	Single	Laurea Magistrale	10	Studente/ssa	0	Genitori	1	10	11	1	Mattina (6:00-13:00), Pomeriggio (13:00-18:00), Sera (18:00-00:00), Notte (00:00-6:00)	No	No	Si	10/11	Sempre	Sempre	Thriller, Drama, Avventura, Commedia, Fantascientifiche, Horror, Crime, Musical, Serie Animate	la casa de papel, game of thrones, shadowhunters, jane the virgin, the 100,	Piattaforme On-Demand (Sky Online, Infinity, Netflix, Mediaset Premium, NowTV, TimVision), Streaming on-line	Si	Solo	Mattina (6:00-13:00), Pomeriggio (13:00-18:00), Sera (18:00-00:00), Notte (00:00-6:00)	No	Sempre	Sempre	Sempre	6	10+	13/14	7	40	20	12	11	83	HIGH BW	33	25	21	79	75	43	106
19	18	Female	1.7	47	16.263	Single	Diploma	13	Studente/ssa	1	Appartamento Condiviso	4			2	Pomeriggio (13:00-18:00), Sera (18:00-00:00)	Si, solo a pranzo	No	Si	3/4 ore	Spesso	Spesso	Commedia	How i met your mother Friends Downotwn abbey	Piattaforme On-Demand (Sky Online, Infinity, Netflix, Mediaset Premium, NowTV, TimVision)	Si	Solo	Pomeriggio (13:00-18:00), Sera (18:00-00:00)	Si, solo a pranzo	Sempre	Sempre	Sempre	7	5	3	7	40	16	12	16	84	HIGH BW	7	9	24	40	48	24	48
20	18	Female	1.67	70	25.0995	Single	Licenza Media	8	Studente/ssa	1	Genitori	5	55	80	2	Sera (18:00-00:00), Notte (00:00-6:00)	Si, solo a pranzo	No	Si	Molto	Spesso	Sempre	Thriller, Drama, Avventura, Anime, Fantascientifiche, Horror, Medical Drama, Crime	The 100, Teen Wolf, The Walking Dead, Game of Thrones	Piattaforme On-Demand (Sky Online, Infinity, Netflix, Mediaset Premium, NowTV, TimVision), Streaming on-line	Si	Solo	Pomeriggio (13:00-18:00), Sera (18:00-00:00), Notte (00:00-6:00)	No	Sempre	Sempre	Sempre	7	10+	12	7	40	20	12	14	86	HIGH BW	33	19	24	76	75	48	78
21	19	Female	1.75	75	24.4898	Fidanzato/a	Diploma	13	Disoccupato/a	0	Genitori	0	10	30	1	Mattina (6:00-13:00), Sera (18:00-00:00), Notte (00:00-6:00)	Si, solo a pranzo	No	Si	5 ore	Raramente	Raramente	Drama, Commedia, Fantascientifiche, Crime, Musical	Friends, Skins, Orange Is The New Black, Game Of Thrones, Breaking Bad, Better Call Saul	Piattaforme On-Demand (Sky Online, Infinity, Netflix, Mediaset Premium, NowTV, TimVision)	Si	Solo	Mattina (6:00-13:00), Sera (18:00-00:00), Notte (00:00-6:00)	Si, in entrambi i pasti	Sempre	Sempre	Spesso	5	10+	5	7	37	16	10	9	72	HIGH BW	18	11	18	47	67	20	90
22	19	Female	1.73	68	22.7204	Single	Diploma	13	Studente/ssa	1	Genitori	2	10	50	2	Pomeriggio (13:00-18:00), Sera (18:00-00:00)	Si, in entrambi i pasti	No	Si	6/7 ore	Spesso	Sempre	Thriller, Drama, Commedia, Horror, Medical Drama, Musical	Glee, once upon a time, Orange is the New Black, sherlock, stranger things, New Girl, la casa de papel, how to get away with murder, American horror story, skam, riverdale, the100, teen wolf	Piattaforme On-Demand (Sky Online, Infinity, Netflix, Mediaset Premium, NowTV, TimVision), Streaming on-line	Si	Solo	Pomeriggio (13:00-18:00), Sera (18:00-00:00)	No	Sempre	Sempre	Sempre	5	6	5	5	40	12	12	8	72	HIGH BW	30	25	20	75	70	41	132
23	19	Female	1.7	76	26.2976	Single	Diploma	13	Disoccupato/a	0	Genitori	1				Sera (18:00-00:00), Notte (00:00-6:00)	Si, in entrambi i pasti	No	Si	Quasi tutta la giornata	Qualche volta	Qualche volta	Thriller, Drama, Avventura, Commedia, Fantascientifiche, Horror, Medical Drama, Crime, Musical, Serie Animate	Victoria, new girl, c'era una volta, The walking dead, shadowhunters, santa Clarita diet, trono di spade,	Piattaforme On-Demand (Sky Online, Infinity, Netflix, Mediaset Premium, NowTV, TimVision), Streaming on-line	Si	Solo	Sera (18:00-00:00), Notte (00:00-6:00)	Si, in entrambi i pasti	Sempre	Sempre	Sempre	7	8	7 ore più o meno	6	35	13	11	13	72	HIGH BW	29	19	27	75	65	31	92
24	19	Female	1.6	65	25.3906	Single	Diploma	13	Studente/ssa	0	Genitori	3	20	10	5	Pomeriggio (13:00-18:00), Sera (18:00-00:00), Notte (00:00-6:00)	Si, in entrambi i pasti	No	Si	6 ore	Spesso	Spesso	Drama, Avventura, Anime, Fantascientifiche, Crime	Il trono di spade Merlin Skam	Piattaforme On-Demand (Sky Online, Infinity, Netflix, Mediaset Premium, NowTV, TimVision)	Si	Solo	Pomeriggio (13:00-18:00), Sera (18:00-00:00), Notte (00:00-6:00)	Si, in entrambi i pasti	Sempre	Sempre	Spesso	7	10+	10	5	37	16	10	10	73	HIGH BW	17	19	17	53	52	10	122
25	19	Female	1.59	63	24.9199	Single	Diploma	13	Lavoro Fisico	0	Genitori	0	10	40	1	Sera (18:00-00:00)	Si, solo a cena	No	Si	4 ore se ho molto da fare, a volte anche 11 ore	Sempre	Qualche volta	Drama, Fantascientifiche, Medical Drama, Crime	csi las vegas, grey's anatomy e supernatural	Streaming on-line	No	Solo	Pomeriggio (13:00-18:00), Sera (18:00-00:00), Notte (00:00-6:00)	No	Sempre	Sempre	Spesso	7	6	4	7	38	15	11	13	77	HIGH BW	31	25	14	70	61	14	98
26	19	Female	1.58	42	16.8242	Fidanzato/a	Licenza Media	8	Studente/ssa	0	Coniuge (o fidanzato/a)	2	10		4	Notte (00:00-6:00)	Si, in entrambi i pasti	Si	Si	8 ore	Raramente	Mai	Drama, Anime, Horror, Medical Drama	grey's anatomy, breaking bad, prison break	Piattaforme On-Demand (Sky Online, Infinity, Netflix, Mediaset Premium, NowTV, TimVision), Streaming on-line	Si	Solo	Notte (00:00-6:00)	Si, in entrambi i pasti	Sempre	Sempre	Spesso	7	10+	14 ore	7	39	20	10	16	85	HIGH BW	34	24	32	90	71	59	106
27	20	Female	1.61	67	25.8478	Single	Diploma	13	Studente/ssa	1	Genitori	4	30	30	3	Mattina (6:00-13:00), Pomeriggio (13:00-18:00), Sera (18:00-00:00)	Si, in entrambi i pasti	No	Si	3-5	Spesso	Sempre	Drama, Avventura, Commedia, Anime, Fantascientifiche, Medical Drama, Crime, Serie Animate	Grey's anatomy Castle Criminal minds	Televisore, Piattaforme On-Demand (Sky Online, Infinity, Netflix, Mediaset Premium, NowTV, TimVision), Streaming on-line	Si	Solo	Mattina (6:00-13:00), Pomeriggio (13:00-18:00), Sera (18:00-00:00), Notte (00:00-6:00)	Si, in entrambi i pasti	Spesso	Spesso	Sempre	3	7	5	4	37	18	12	9	76	HIGH BW	27	18	26	71	70	34	123
28	20	Female	1.5	60	26.6667	Sposato/a o Convivente	Licenza Elementare	16	Casalingo/a	0	Coniuge (o fidanzato/a)	0	0		24	Mattina (6:00-13:00), Pomeriggio (13:00-18:00), Sera (18:00-00:00), Notte (00:00-6:00)	Si, in entrambi i pasti	No	Si	24h	Sempre	Sempre	Drama, Avventura, Commedia, Fantascientifiche	Pretty little liars Lucifer Cherry season	Piattaforme On-Demand (Sky Online, Infinity, Netflix, Mediaset Premium, NowTV, TimVision), Streaming on-line	Si	Solo	Mattina (6:00-13:00), Pomeriggio (13:00-18:00), Sera (18:00-00:00), Notte (00:00-6:00)	Si, in entrambi i pasti	Qualche Volta	Qualche Volta	Qualche Volta	3	10+	21:00-07:00	6	37	16	10	14	77	HIGH BW	23	21	24	68	65	26	89
29	20	Female	1.8	60	18.5185	Single	Diploma	14	Studente/ssa	1	Genitori	1	2	10	2	Sera (18:00-00:00)	No	No	Si	Dipende perché quando sono fissata con una anche 5 ore però normalmente solo 2h alla settimana	Sempre	Spesso	Thriller, Drama, Commedia, Fantascientifiche, Horror, Medical Drama	Grey’s anatomy; community ; stranger things ; this is us ; station 19 ; modern family ; atypical	Piattaforme On-Demand (Sky Online, Infinity, Netflix, Mediaset Premium, NowTV, TimVision), Streaming on-line	No	Solo	Sera (18:00-00:00), Notte (00:00-6:00)	No	Sempre	Sempre	Quasi Mai	4	10+	5	2	38	18	12	15	83	HIGH BW	26	15	19	60	71	36	26
30	21	Female	1.67	65	23.3067	Single	Diploma	16	Studente/ssa	1	Genitori	2	4	10	1	Pomeriggio (13:00-18:00)	No	Si	Si	4 ore	Qualche volta	Raramente	Avventura, Commedia, Fantascientifiche, Medical Drama	Friends, Atypical, Stranger Things	Piattaforme On-Demand (Sky Online, Infinity, Netflix, Mediaset Premium, NowTV, TimVision), Streaming on-line	Si	Solo	Sera (18:00-00:00)	Si, solo a pranzo	Spesso	Spesso	Quasi Mai	4	3	5	4	35	16	8	14	73	HIGH BW	23	21	17	61	57	17	86
31	22	Female	1.62	50	19.052	Single	Diploma	13	Studente/ssa	1	Genitori	0	5	10	2	Sera (18:00-00:00)	Si, in entrambi i pasti	No	Si	6	Sempre	Sempre	Thriller, Drama, Avventura, Commedia, Fantascientifiche	Serie DC, Riverdale, TO, Timeless, Westworld, Dynasty, Shadowhunters	Streaming on-line	No	Solo	Pomeriggio (13:00-18:00), Sera (18:00-00:00), Notte (00:00-6:00)	Si, in entrambi i pasti	Sempre	Sempre	Spesso	7	10+	11	4	34	16	10	14	74	HIGH BW	27	23	20	70	68	32	54
32	23	Female	1.7	60	20.7612	Single	Diploma	13	Lavoro Intellettuale	1	Genitori	2	6	35	4	Mattina (6:00-13:00), Sera (18:00-00:00), Notte (00:00-6:00)	Si, in entrambi i pasti	No	Si	3	Spesso	Qualche volta	Avventura, Commedia, Anime, Fantascientifiche, Medical Drama, Crime, Serie Animate	Agents of shield, once upon a time, lucifer, big bang theory	Piattaforme On-Demand (Sky Online, Infinity, Netflix, Mediaset Premium, NowTV, TimVision), Streaming on-line	Si	Solo	Pomeriggio (13:00-18:00), Sera (18:00-00:00), Notte (00:00-6:00)	Si, solo a cena	Sempre	Sempre	Mai	3	4	4	2	37	13	11	8	69	HIGH BW	26	16	17	59	58	35	44
33	26	Female	1.61	49	18.9036	Sposato/a o Convivente	Diploma	13	Lavoro Fisico	1	Coniuge (o fidanzato/a)	5	0	15	6	Mattina (6:00-13:00), Notte (00:00-6:00)	Si, in entrambi i pasti	No	Si	5	Qualche volta	Qualche volta	Thriller, Avventura, Fantascientifiche, Crime, Fantasy	Once upon a time black mirror penny dreadful grace amd frankie criminal minds the crown downtown abbey	Televisore, Piattaforme On-Demand (Sky Online, Infinity, Netflix, Mediaset Premium, NowTV, TimVision)	Si	Solo	Sera (18:00-00:00)	Si, solo a pranzo	Sempre	Sempre	Qualche Volta	2	6	7	2	37	12	10	10	69	HIGH BW	33	19	12	64	70	25	71
34	26	Female	1.66	70	25.4028	Fidanzato/a	Diploma	13	Lavoro Fisico	0	Genitori	3	12	14	0	Notte (00:00-6:00)	No	No	Si	5	Sempre	Sempre	Thriller, Drama, Avventura, Commedia, Crime	Jessica Jones, Grimm, The Crown, Shameless, This Is Us, Trono di Spade, Once Upon A Time, Call the Midwife, Newgirl, Doctor Who, The Hanmaid’s Tale	Piattaforme On-Demand (Sky Online, Infinity, Netflix, Mediaset Premium, NowTV, TimVision), Streaming on-line	Si	Solo	Sera (18:00-00:00), Notte (00:00-6:00)	No	Sempre	Sempre	Mai	7	6	7	7	35	20	11	10	76	HIGH BW	32	12	18	62	76	50	106
35	27	Female	1.67	67	24.0238	Fidanzato/a	Laurea Triennale	16	Lavoro Intellettuale	1	Solo	3	1	4	3	Pomeriggio (13:00-18:00), Sera (18:00-00:00)	Si, in entrambi i pasti	Si	Si	3 ore al giorno	Sempre	Sempre	Commedia, Medical Drama	Una mamma per amica, grey's anatomy, jane the virgin	Piattaforme On-Demand (Sky Online, Infinity, Netflix, Mediaset Premium, NowTV, TimVision)	Si	Con il partner	Sera (18:00-00:00)	Si, in entrambi i pasti	Sempre	Sempre	Sempre	7	4	4	5	40	20	12	16	88	HIGH BW	35	21	24	80	51	38	111
36	30	Female	1.5	60	26.6667	Fidanzato/a	Laurea Magistrale	18	Disoccupato/a	0	Genitori	0	0	10	1	Pomeriggio (13:00-18:00), Sera (18:00-00:00)	Si, in entrambi i pasti	No	Si	6	Mai	Raramente	Thriller, Drama, Fantascientifiche, Horror, Medical Drama, Crime	Gilmore Girls, Lost, Friends	Piattaforme On-Demand (Sky Online, Infinity, Netflix, Mediaset Premium, NowTV, TimVision), Streaming on-line	Si	Solo	Pomeriggio (13:00-18:00), Sera (18:00-00:00), Notte (00:00-6:00)	No	Sempre	Sempre	Qualche Volta	7	6	5	4	35	16	8	11	70	HIGH BW	35	25	29	89	76	52	119
37	18	Male	1.71	70	23.939	Single	Licenza Media	8	Studente/ssa	0	Genitori	0	7	5	0	Mattina (6:00-13:00), Pomeriggio (13:00-18:00), Sera (18:00-00:00), Notte (00:00-6:00)	Si, in entrambi i pasti	Si	Si	sempre	Sempre	Sempre	Thriller, Drama, Avventura, Commedia, Anime, Fantascientifiche, Horror, Medical Drama, Crime, Musical, Serie Animate	Riverdale Pretty Little Liars Teen Wolf	Televisore, Piattaforme On-Demand (Sky Online, Infinity, Netflix, Mediaset Premium, NowTV, TimVision), Streaming on-line, Cellulare	Si	Solo	Mattina (6:00-13:00), Pomeriggio (13:00-18:00), Sera (18:00-00:00), Notte (00:00-6:00)	No	Sempre	Sempre	Sempre	7	8	16	7	36	19	12	11	78	HIGH BW	23	17	26	66	66	56	126
38	18	Male	1.71	70	23.939	Single	Licenza Media	8	Studente/ssa	0	Genitori	0	7	5	0	Mattina (6:00-13:00), Pomeriggio (13:00-18:00), Sera (18:00-00:00), Notte (00:00-6:00)	Si, in entrambi i pasti	Si	Si	sempre	Sempre	Sempre	Thriller, Drama, Avventura, Commedia, Anime, Fantascientifiche, Horror, Medical Drama, Crime, Musical, Serie Animate	Riverdale Pretty Little Liars Teen Wolf	Televisore, Piattaforme On-Demand (Sky Online, Infinity, Netflix, Mediaset Premium, NowTV, TimVision), Streaming on-line, Cellulare	Si	Solo	Mattina (6:00-13:00), Pomeriggio (13:00-18:00), Sera (18:00-00:00), Notte (00:00-6:00)	No	Sempre	Sempre	Sempre	7	8	16	7	36	19	12	11	78	HIGH BW	23	17	26	66	66	56	126
39	21	Male	1.74	75	24.7721	Fidanzato/a	Diploma	13	Studente/ssa	1	Genitori	0			3	Sera (18:00-00:00)	Si, solo a cena	No	Si	Quasi mezza giornata	Raramente	Qualche volta	Thriller, Avventura, Commedia, Anime, Fantascientifiche, Medical Drama, Crime	Quantico, Mr. Robot, arrow	Piattaforme On-Demand (Sky Online, Infinity, Netflix, Mediaset Premium, NowTV, TimVision), Streaming on-line	Si	Solo	Mattina (6:00-13:00), Pomeriggio (13:00-18:00), Sera (18:00-00:00)	Si, solo a pranzo	Sempre	Sempre	Spesso	7	5	5	7	34	17	10	10	71	HIGH BW	10	8	16	34	48	7	41
40	21	Male	1.74	75	24.7721	Fidanzato/a	Diploma	13	Studente/ssa	1	Genitori	0			3	Sera (18:00-00:00)	Si, solo a cena	No	Si	Quasi mezza giornata	Raramente	Qualche volta	Thriller, Avventura, Commedia, Anime, Fantascientifiche, Medical Drama, Crime	Quantico, Mr. Robot, arrow	Piattaforme On-Demand (Sky Online, Infinity, Netflix, Mediaset Premium, NowTV, TimVision), Streaming on-line	Si	Solo	Mattina (6:00-13:00), Pomeriggio (13:00-18:00), Sera (18:00-00:00)	Si, solo a pranzo	Sempre	Sempre	Spesso	7	5	5	7	34	17	10	10	71	HIGH BW	10	8	16	34	48	7	41
41	21	Male	1.8	110	33.9506	Single	Diploma	15	Studente/ssa	0	Appartamento Condiviso	0	5	10	6	Sera (18:00-00:00), Notte (00:00-6:00)	No	Si	Si	6	Qualche volta	Qualche volta	Thriller, Drama, Avventura, Commedia, Biografiche, Fantascientifiche	House of Cards, OITNB, Stranger Things	Piattaforme On-Demand (Sky Online, Infinity, Netflix, Mediaset Premium, NowTV, TimVision), Streaming on-line	Si	Solo	Sera (18:00-00:00), Notte (00:00-6:00)	No	Spesso	Qualche Volta	Spesso	1	10+	6-7	4	35	16	10	11	72	HIGH BW	27	18	14	59	71	45	86
42	21	Male	1.8	110	33.9506	Single	Diploma	15	Studente/ssa	0	Appartamento Condiviso	0	5	10	6	Sera (18:00-00:00), Notte (00:00-6:00)	No	Si	Si	6	Qualche volta	Qualche volta	Thriller, Drama, Avventura, Commedia, Biografiche, Fantascientifiche	House of Cards, OITNB, Stranger Things	Piattaforme On-Demand (Sky Online, Infinity, Netflix, Mediaset Premium, NowTV, TimVision), Streaming on-line	Si	Solo	Sera (18:00-00:00), Notte (00:00-6:00)	No	Spesso	Qualche Volta	Spesso	1	10+	6-7	4	35	16	10	11	72	HIGH BW	27	18	14	59	71	45	86
43	22	Male	1.75	85	27.7551	Single	Diploma	16	Studente/ssa	0	Genitori	1	21	40	1	Pomeriggio (13:00-18:00), Sera (18:00-00:00)	Si, in entrambi i pasti	No	Si	4	Spesso	Qualche volta	Thriller, Drama, Anime, Crime, Serie Animate	I Griffin, I Simpson, Boruto	Televisore, Piattaforme On-Demand (Sky Online, Infinity, Netflix, Mediaset Premium, NowTV, TimVision), Streaming on-line	Si	Solo	Mattina (6:00-13:00), Pomeriggio (13:00-18:00), Sera (18:00-00:00), Notte (00:00-6:00)	No	Sempre	Sempre	Quasi Mai	7	10+	2	4	34	14	12	11	71	HIGH BW	27	25	19	71	67	34	87
44	22	Male	1.75	85	27.7551	Single	Diploma	16	Studente/ssa	0	Genitori	1	21	40	1	Pomeriggio (13:00-18:00), Sera (18:00-00:00)	Si, in entrambi i pasti	No	Si	4	Spesso	Qualche volta	Thriller, Drama, Anime, Crime, Serie Animate	I Griffin, I Simpson, Boruto	Televisore, Piattaforme On-Demand (Sky Online, Infinity, Netflix, Mediaset Premium, NowTV, TimVision), Streaming on-line	Si	Solo	Mattina (6:00-13:00), Pomeriggio (13:00-18:00), Sera (18:00-00:00), Notte (00:00-6:00)	No	Sempre	Sempre	Quasi Mai	7	10+	2	4	34	14	12	11	71	HIGH BW	27	25	19	71	67	34	87
45	18	Female	1.75	60	19.5918	Fidanzato/a	Licenza Media	14	Studente/ssa	0	Genitori	2	14	20	1	Mattina (6:00-13:00), Pomeriggio (13:00-18:00), Sera (18:00-00:00)	Si, in entrambi i pasti	No	Si	5/6 ore	Spesso	Spesso	Drama, Commedia	Patty little liars, how I met tour mother, sense8	Piattaforme On-Demand (Sky Online, Infinity, Netflix, Mediaset Premium, NowTV, TimVision)	Si	Solo	Mattina (6:00-13:00), Pomeriggio (13:00-18:00), Sera (18:00-00:00)	Si, in entrambi i pasti	Sempre	Sempre	Qualche Volta	6	8	6	7	21	13	9	9	52	MODERATE_BW	24	17	24	65	53	16	90
46	18	Female	1.7	50	17.301	Single	Diploma	13	Studente/ssa	0	Genitori	1	8		2	Pomeriggio (13:00-18:00), Sera (18:00-00:00)	Si, in entrambi i pasti	Si	Si	4/5 ore	Qualche volta	Spesso	Thriller, Drama, Avventura, Anime, Fantascientifiche, Horror, Crime, Fantasy, soprannaturale	Game of Thrones, la casa di carta, American horror story, breaking bad	Televisore, Streaming on-line	No	Solo	Sera (18:00-00:00)	No	Spesso	Quasi Mai	Quasi Mai	3	5	5/6 ore	1	26	14	6	6	52	MODERATE_BW	27	18	18	63	61	22	71
47	18	Female	1.74	70	23.1206	Single	Diploma	13	Studente/ssa	1	Genitori	2	1	5	2	Pomeriggio (13:00-18:00), Sera (18:00-00:00)	Si, solo a pranzo	No	Si	1	Spesso	Spesso	Thriller, Avventura, Commedia, Fantascientifiche, Medical Drama, Crime	Riverdale,Grey's Anatomy,Famous in love	Piattaforme On-Demand (Sky Online, Infinity, Netflix, Mediaset Premium, NowTV, TimVision), Streaming on-line	Si	Solo	Pomeriggio (13:00-18:00), Sera (18:00-00:00)	Si, solo a pranzo	Qualche Volta	Spesso	Quasi Mai	2	3	3	2	26	11	8	7	52	MODERATE_BW	26	18	22	66	52	21	89
48	18	Female	1.63	68	25.5937	Single	Diploma	13	Studente/ssa	0	Genitori	3	2	4	1	Pomeriggio (13:00-18:00), Sera (18:00-00:00)	Si, in entrambi i pasti	Si	Si	3-4 ore	Qualche volta	Sempre	Thriller, Drama, Avventura, Crime	The Walking Dead, Black Mirror, Stranger Things	Piattaforme On-Demand (Sky Online, Infinity, Netflix, Mediaset Premium, NowTV, TimVision), Streaming on-line	Si	Solo	Pomeriggio (13:00-18:00), Sera (18:00-00:00), Notte (00:00-6:00)	No	Sempre	Sempre	Quasi Mai	2	8	3	3	29	8	9	7	53	MODERATE_BW	20	14	21	55	54	12	87
49	18	Female	1.5	55	24.4444	Fidanzato/a	Diploma	13	Studente/ssa	0	Genitori	1	0	2	0.5	Sera (18:00-00:00)	No	No	Si	5 ore	Raramente	Qualche volta	Drama, Commedia, Fantascientifiche, Crime, Serie Animate	Supernatural, How i met your mother, Sherlock	Piattaforme On-Demand (Sky Online, Infinity, Netflix, Mediaset Premium, NowTV, TimVision), Streaming on-line	Si	Solo	Pomeriggio (13:00-18:00), Notte (00:00-6:00)	Si, solo a pranzo	Sempre	Sempre	Quasi Mai	7	10+	4	7	24	13	8	8	53	MODERATE_BW	21	18	24	63	51	12	73
50	18	Female	1.6	56	21.875	Fidanzato/a	Diploma	13	Studente/ssa	1	Genitori	2	2	9	1	Pomeriggio (13:00-18:00)	Si, solo a pranzo	No	Si	7	Qualche volta	Qualche volta	Drama, Commedia, Crime	La casa di carta, le ragazze del centralino, le regole del delitto perfetto	Piattaforme On-Demand (Sky Online, Infinity, Netflix, Mediaset Premium, NowTV, TimVision)	Si	Con il partner	Pomeriggio (13:00-18:00), Sera (18:00-00:00)	No	Spesso	Sempre	Qualche Volta	6	8	10/13 ore, dipende dal tempo libero	4	23	15	9	6	53	MODERATE_BW	14	9	21	44	43	13	49
51	18	Female	1.65	50	18.3655	Single	Diploma	13	Studente/ssa	1	Genitori	0	1	24	1	Pomeriggio (13:00-18:00), Sera (18:00-00:00)	Si, in entrambi i pasti	Si	Si	3 ore	Qualche volta	Qualche volta	Avventura, Commedia, Anime, Musical, Serie Animate	sherlock, skam, la casa di carta	Piattaforme On-Demand (Sky Online, Infinity, Netflix, Mediaset Premium, NowTV, TimVision), Streaming on-line	Si	Solo	Pomeriggio (13:00-18:00), Sera (18:00-00:00)	Si, solo a pranzo	Qualche Volta	Spesso	Qualche Volta	3	4	4	2	27	10	11	5	53	MODERATE_BW	23	12	19	54	57	17	92
52	18	Female	1.63	46	17.3134	Single	Licenza Media	8	Studente/ssa	1	Genitori	1	15	7	1	Sera (18:00-00:00)	Si, solo a pranzo	No	Si	3	Raramente	Qualche volta	Anime, Fantascientifiche, Medical Drama, Serie Animate	The vampire diaries , glee , shameless	Piattaforme On-Demand (Sky Online, Infinity, Netflix, Mediaset Premium, NowTV, TimVision), Streaming on-line	Si	Solo	Sera (18:00-00:00)	Si, solo a cena	Spesso	Spesso	Quasi Mai	7	10+	10	4	33	13	6	1	53	MODERATE_BW	35	21	21	77	70	19	102
53	18	Female	1.65	65	23.8751	Single	Diploma	13	Studente/ssa	1	Genitori	3	0	9	1	Sera (18:00-00:00)	Si, solo a cena	No	Si	2 ore	Spesso	Qualche volta	Drama, Commedia, Documentaristiche, Fantascientifiche, Musical	Brooklyn 99, c'era una volta, I cesaroni	Piattaforme On-Demand (Sky Online, Infinity, Netflix, Mediaset Premium, NowTV, TimVision)	Si	Solo	Pomeriggio (13:00-18:00)	Si, solo a pranzo	Spesso	Sempre	Qualche Volta	3	8	5	2	30	9	7	7	53	MODERATE_BW	22	19	18	59	63	21	57
54	18	Female	1.63	68	25.5937	Single	Licenza Media	13	Studente/ssa	0	Genitori	4	10	15	3	Pomeriggio (13:00-18:00), Sera (18:00-00:00), Notte (00:00-6:00)	Si, solo a pranzo	Si	Si	6	Qualche volta	Qualche volta	Drama, Commedia, Biografiche, Fantascientifiche, Medical Drama, Serie Animate	Greys Anatomy, Agent of shield, game of thrones e modern family	Televisore, Piattaforme On-Demand (Sky Online, Infinity, Netflix, Mediaset Premium, NowTV, TimVision), Streaming on-line	Si	Solo	Pomeriggio (13:00-18:00)	Si, solo a pranzo	Spesso	Spesso	Sempre	5	10+	10	5	23	14	11	5	53	MODERATE_BW	15	6	19	40	48	5	30
55	18	Female	1.68	68	24.093	Single	Licenza Media	12	Studente/ssa	1	Genitori	3	0	12	2	Pomeriggio (13:00-18:00), Sera (18:00-00:00)	Si, in entrambi i pasti	No	Si	4	Qualche volta	Qualche volta	Drama, Avventura, Commedia, Fantascientifiche, Medical Drama, Crime, Serie Animate	Grey's Anatomy Legends of tommorrow Wynnona earp	Televisore, Piattaforme On-Demand (Sky Online, Infinity, Netflix, Mediaset Premium, NowTV, TimVision), Streaming on-line	Si	Solo	Pomeriggio (13:00-18:00), Sera (18:00-00:00), Notte (00:00-6:00)	Si, solo a pranzo	Spesso	Spesso	Spesso	3	6	5	2	23	12	9	10	54	MODERATE_BW	11	11	22	44	40	4	20
56	18	Female	1.63	67	25.2174	Single	Licenza Media	13	Studente/ssa	1	Genitori	0	0		2	Pomeriggio (13:00-18:00), Sera (18:00-00:00)	No	No	Si	6/8 ore	Qualche volta	Raramente	Drama, Commedia, Fantascientifiche	Friends, agents of shield, doctor Who, Vikings, Shadow Hunter, Simpson	Televisore, Piattaforme On-Demand (Sky Online, Infinity, Netflix, Mediaset Premium, NowTV, TimVision), Streaming on-line	Si	Solo	Pomeriggio (13:00-18:00), Sera (18:00-00:00)	Si, in entrambi i pasti	Sempre	Sempre	Spesso	7	7	8	4	31	10	7	6	54	MODERATE_BW	17	11	18	46	49	13	68
57	18	Female	1.61	52	20.061	Single	Diploma	13	Studente/ssa	1	Genitori	1	9	10	0.5	Notte (00:00-6:00)	No	Si	Si	3 ore	Qualche volta	Qualche volta	Thriller, Drama, Avventura, Anime, Fantascientifiche, Medical Drama	Grey's Anatomy, Dr House, 13 Reason Why, The End Of The Fucking World, Everything Sucks, Death Note, Alexa e Katie, The 100	Piattaforme On-Demand (Sky Online, Infinity, Netflix, Mediaset Premium, NowTV, TimVision), Streaming on-line	No	Solo	Notte (00:00-6:00)	No	Spesso	Sempre	Qualche Volta	6	3	2.15	7	22	15	11	6	54	MODERATE_BW	32	19	14	65	49	28	0
58	18	Female	1.67	55	19.721	Single	Diploma	13	Studente/ssa	1	Genitori	1	3	6	1	Sera (18:00-00:00)	Si, in entrambi i pasti	Si	Si	3	Raramente	Raramente	Drama, Avventura, Commedia, Fantascientifiche, Medical Drama, Crime	Grey’s Anatomy, Scandal, The Royals	Televisore, Piattaforme On-Demand (Sky Online, Infinity, Netflix, Mediaset Premium, NowTV, TimVision), Streaming on-line	Si	Solo	Pomeriggio (13:00-18:00), Sera (18:00-00:00)	Si, in entrambi i pasti	Spesso	Spesso	Quasi Mai	6	3	3	4	28	11	10	5	54	MODERATE_BW	17	16	19	52	36	3	34
59	18	Female	1.68	65	23.03	Single	Licenza Media	12	Studente/ssa	1	Genitori	2	10	30	0	Sera (18:00-00:00)	Si, in entrambi i pasti	No	Si	Un'ora	Qualche volta	Qualche volta	Drama, Commedia, Biografiche, Fantascientifiche, Medical Drama, Crime	Doctor who, Penny Dreadful, Game of Thrones	Piattaforme On-Demand (Sky Online, Infinity, Netflix, Mediaset Premium, NowTV, TimVision), Streaming on-line	Si	Solo	Pomeriggio (13:00-18:00), Sera (18:00-00:00)	Si, solo a pranzo	Quasi Mai	Quasi Mai	Qualche Volta	2	4	Circa 4	2	31	10	6	7	54	MODERATE_BW	25	20	25	70	60	31	78
60	18	Female	1.7	70	24.2215	Single	Licenza Media	12	Studente/ssa	0	Genitori	1	10	15	2	Notte (00:00-6:00)	No	No	Si	15 ore	Spesso	Spesso	Drama, Avventura, Horror, Crime	Dark, Black mirror, Teen Wolf	Piattaforme On-Demand (Sky Online, Infinity, Netflix, Mediaset Premium, NowTV, TimVision)	Si	Solo	Pomeriggio (13:00-18:00), Sera (18:00-00:00), Notte (00:00-6:00)	Si, solo a pranzo	Sempre	Sempre	Sempre	7	10+	13	6	27	8	11	9	55	MODERATE_BW	31	18	14	63	79	36	96
61	18	Female	1.57	54	21.9076	Fidanzato/a	Diploma	13	Studente/ssa	0	Genitori	2	15	30	2	Pomeriggio (13:00-18:00)	Si, solo a pranzo	No	Si	Quattro	Raramente	Raramente	Thriller, Drama, Commedia, Biografiche, Crime, Musical	The office, mindhunter, doctor who	Streaming on-line, DVD	No	Solo	Pomeriggio (13:00-18:00)	Si, solo a pranzo	Sempre	Sempre	Spesso	6	10+	7	5	29	13	7	6	55	MODERATE_BW	34	22	21	77	59	38	96
62	18	Female	1.6	56	21.875	Single	Diploma	13	Studente/ssa	0	Genitori	5	10	18	2	Pomeriggio (13:00-18:00), Sera (18:00-00:00)	Si, in entrambi i pasti	Si	Si	1	Mai	Qualche volta	Thriller, Drama, Avventura, Commedia, Documentaristiche, Fantascientifiche, Horror, Medical Drama, Crime, Musical	Gotham modern family new girl	Piattaforme On-Demand (Sky Online, Infinity, Netflix, Mediaset Premium, NowTV, TimVision), Streaming on-line	Si	Solo	Pomeriggio (13:00-18:00)	No	Spesso	Spesso	Mai	6	3	1	5	29	8	11	7	55	MODERATE_BW	10	9	12	31	63	24	54
63	18	Female	1.7	56	19.3772	Single	Diploma	13	Studente/ssa	1	Genitori	1	6	9	1	Pomeriggio (13:00-18:00)	Si, in entrambi i pasti	No	Si	3 ore	Spesso	Spesso	Drama, Commedia, Fantascientifiche, Crime	Friends The walking dead How i met your mother	Piattaforme On-Demand (Sky Online, Infinity, Netflix, Mediaset Premium, NowTV, TimVision), Streaming on-line	Si	Solo	Pomeriggio (13:00-18:00), Sera (18:00-00:00)	Si, in entrambi i pasti	Spesso	Spesso	Qualche Volta	7	6	4	7	29	13	9	4	55	MODERATE_BW	26	21	16	63	45	3	53
64	18	Female	1.6	68	26.5625	Single	Diploma	13	Studente/ssa	0	Genitori	3	10	6	1	Sera (18:00-00:00)	No	Si	Si	3	Qualche volta	Raramente	Drama, Commedia, Anime, Documentaristiche, Medical Drama, Musical, Serie Animate	Peaky blinders, sense8, the 100	Piattaforme On-Demand (Sky Online, Infinity, Netflix, Mediaset Premium, NowTV, TimVision), Streaming on-line	Si	Solo	Pomeriggio (13:00-18:00), Sera (18:00-00:00)	Si, solo a pranzo	Sempre	Sempre	Qualche Volta	7	10+	8	7	27	11	11	6	55	MODERATE_BW	33	21	23	77	51	7	65
65	18	Female	1.65	59	21.6713	Single	Diploma	13	Studente/ssa	1	Genitori	1	5	30	4	Sera (18:00-00:00)	Si, in entrambi i pasti	Si	Si	6 ore	Sempre	Sempre	Avventura, Commedia, Fantascientifiche, Crime	Grimm, iZombie, Modern family, How I met your mother, Lucifer, Santa clarita diet, Game of throns	Piattaforme On-Demand (Sky Online, Infinity, Netflix, Mediaset Premium, NowTV, TimVision), Streaming on-line	Si	Con la famiglia	Pomeriggio (13:00-18:00), Sera (18:00-00:00), Notte (00:00-6:00)	No	Sempre	Sempre	Spesso	7	10+	12	7	30	14	6	5	55	MODERATE_BW	19	12	12	43	63	35	77
66	18	Female	1.65	59	21.6713	Single	Diploma	13	Studente/ssa	1	Genitori	1	5	30	4	Sera (18:00-00:00)	Si, in entrambi i pasti	Si	Si	6 ore	Sempre	Sempre	Avventura, Commedia, Fantascientifiche, Crime	Grimm, iZombie, Modern family, How I met your mother, Lucifer, Santa clarita diet, Game of throns	Piattaforme On-Demand (Sky Online, Infinity, Netflix, Mediaset Premium, NowTV, TimVision), Streaming on-line	Si	Con la famiglia	Pomeriggio (13:00-18:00), Sera (18:00-00:00), Notte (00:00-6:00)	No	Sempre	Sempre	Spesso	7	10+	12	7	30	14	6	5	55	MODERATE_BW	19	12	12	43	63	35	77
67	18	Female	1.65	50	18.3655	Fidanzato/a	Diploma	13	Studente/ssa	1	Genitori	0	0	5	2	Pomeriggio (13:00-18:00), Sera (18:00-00:00), Notte (00:00-6:00)	Si, in entrambi i pasti	Si	Si	2 ore	Spesso	Spesso	Commedia, Crime	la casa de papel, jane the virgin, alexa & katie	Televisore, Piattaforme On-Demand (Sky Online, Infinity, Netflix, Mediaset Premium, NowTV, TimVision)	Si	Solo	Pomeriggio (13:00-18:00)	No	Sempre	Sempre	Qualche Volta	6	5	4	7	24	17	7	8	56	MODERATE_BW	24	18	28	70	68	47	70
68	18	Female	1.65	50	18.3655	Fidanzato/a	Licenza Media	13	Studente/ssa	0	Genitori	3	5	2	0	Sera (18:00-00:00)	No	Si	Si	3	Raramente	Raramente	Thriller, Drama, Avventura, Fantascientifiche	Oitnb carmilla the100	Piattaforme On-Demand (Sky Online, Infinity, Netflix, Mediaset Premium, NowTV, TimVision), Streaming on-line	Si	Solo	Sera (18:00-00:00)	Si, solo a pranzo	Spesso	Mai	Quasi Mai	1	7	5	2	24	17	5	10	56	MODERATE_BW	30	19	20	69	64	19	57
69	18	Female	1.7	70	24.2215	Single	Diploma	13	Studente/ssa	1	Genitori	1	4	8	3	Sera (18:00-00:00)	Si, in entrambi i pasti	No	Si	3	Qualche volta	Spesso	Thriller, Avventura, Fantascientifiche, Crime	Riverdale La casa de papel Orphan black	Streaming on-line	Si	Solo	Sera (18:00-00:00)	No	Sempre	Sempre	Mai	3	9	7	4	27	12	8	9	56	MODERATE_BW	32	22	25	79	64	27	70
70	18	Female	1.65	57	20.9366	Single	Licenza Media	13	Studente/ssa	1	Genitori	2	4	6	0.5	Pomeriggio (13:00-18:00), Sera (18:00-00:00)	Si, in entrambi i pasti	No	Si	2 ore	Spesso	Spesso	Thriller, Drama, Commedia, Fantascientifiche, Crime	Big bang theory game of thrones breaking bad sherlock how to get away with murder modern family	Piattaforme On-Demand (Sky Online, Infinity, Netflix, Mediaset Premium, NowTV, TimVision), Streaming on-line	Si	Solo	Pomeriggio (13:00-18:00), Sera (18:00-00:00)	No	Sempre	Spesso	Mai	4	6	4	3	24	16	11	5	56	MODERATE_BW	13	18	20	51	68	20	60
71	18	Female	1.7	60	20.7612	Fidanzato/a	Licenza Media	15	Studente/ssa	0	Genitori	0	30	30	0	Sera (18:00-00:00), Notte (00:00-6:00)	Si, in entrambi i pasti	No	Si	10 ore	Qualche volta	Qualche volta	Drama, Biografiche, Fantascientifiche	The end of the fucking world, La casa di carta, A	Piattaforme On-Demand (Sky Online, Infinity, Netflix, Mediaset Premium, NowTV, TimVision)	Si	Solo	Notte (00:00-6:00)	Si, solo a cena	Spesso	Sempre	Mai	5	10+	12	4	26	14	6	10	56	MODERATE_BW	17	14	21	52	51	25	26
72	18	Female	1.65	45	16.5289	Single	Diploma	13	Studente/ssa	0	Genitori	2	20		8	Pomeriggio (13:00-18:00), Sera (18:00-00:00)	No	No	Si	10	Sempre	Sempre	Thriller, Drama, Avventura, Crime, Fantasy	The Vampire Diaries Friends Pretty Little Liars	Televisore, DVD	Si	Solo	Pomeriggio (13:00-18:00), Sera (18:00-00:00)	Si, solo a pranzo	Sempre	Sempre	Mai	7	4	3/4	7	29	14	3	11	57	MODERATE_BW	22	24	33	79	49	12	72
73	18	Female	1.56	56	23.0112	Fidanzato/a	Diploma	13	Studente/ssa	1	Genitori	2	15	20	0	Sera (18:00-00:00)	Si, in entrambi i pasti	Si	Si	2	Raramente	Raramente	Drama, Avventura, Commedia, Anime, Fantascientifiche, Horror, Crime, Musical	Modern Family La casa de papel Riverdale	Piattaforme On-Demand (Sky Online, Infinity, Netflix, Mediaset Premium, NowTV, TimVision), Streaming on-line	Si	Solo	Sera (18:00-00:00)	Si, in entrambi i pasti	Qualche Volta	Qualche Volta	Mai	2	10+	10+	3	37	10	7	3	57	MODERATE_BW	31	15	25	71	67	35	50
74	18	Female	1.68	70	24.8016	Single	Licenza Media	8	Studente/ssa	0	Genitori	3	5	10	2	Sera (18:00-00:00)	Si, in entrambi i pasti	No	Si	4 ore	Raramente	Raramente	Thriller, Avventura, Commedia, Anime, Crime, Serie Animate	Voltron, the big bang theory, flash	Televisore, Piattaforme On-Demand (Sky Online, Infinity, Netflix, Mediaset Premium, NowTV, TimVision)	Si	Con la famiglia	Sera (18:00-00:00)	Si, solo a cena	Mai	Quasi Mai	Qualche Volta	3	4	3	2	29	10	6	12	57	MODERATE_BW	26	19	16	61	58	20	100
75	18	Female	1.7	70	24.2215	Single	Diploma	16	Studente/ssa	0	Genitori	1	5	10	3	Pomeriggio (13:00-18:00), Sera (18:00-00:00)	Si, in entrambi i pasti	No	Si	4-5	Qualche volta	Qualche volta	Drama, Avventura, Fantascientifiche, Medical Drama, Crime	Teen Wolf,Reign,Once Upton a Time	Streaming on-line, DVD	No	Solo	Sera (18:00-00:00), Notte (00:00-6:00)	No	Qualche Volta	Quasi Mai	Spesso	1	10+	8	1	29	13	9	6	57	MODERATE_BW	29	22	21	72	64	35	58
76	18	Female	1.63	61	22.9591	Single	Diploma	13	Studente/ssa	1	Genitori	5	50	15	0	Pomeriggio (13:00-18:00)	No	No	Si	5	Raramente	Qualche volta	Thriller, Drama, Avventura, Commedia, Anime, Biografiche, Documentaristiche, Fantascientifiche, Horror, Crime, Serie Animate	How I met Your Mother Dexter Game of Thrones	Piattaforme On-Demand (Sky Online, Infinity, Netflix, Mediaset Premium, NowTV, TimVision), Streaming on-line	Si	Solo	Pomeriggio (13:00-18:00)	Si, solo a pranzo	Sempre	Sempre	Sempre	7	10+	7	3	26	17	9	5	57	MODERATE_BW	27	15	15	57	54	19	73
77	18	Female	1.7	59	20.4152	Single	Licenza Media	8	Studente/ssa	1	Genitori	2	5	24	2	Sera (18:00-00:00)	Si, in entrambi i pasti	No	Si	5 ore	Spesso	Spesso	Thriller, Drama, Avventura, Commedia, Fantascientifiche	Game of thrones, the 100, the vampire diaries	Streaming on-line	Si	Solo	Pomeriggio (13:00-18:00), Sera (18:00-00:00)	No	Sempre	Sempre	Sempre	7	10+	7	4	26	14	10	7	57	MODERATE_BW	26	19	22	67	54	18	64
78	18	Female	1.8	80	24.6914	Single	Diploma	13	Studente/ssa	0	Genitori	1	10	6	2	Sera (18:00-00:00)	No	Si	Si	7	Mai	Spesso	Commedia, Anime, Medical Drama, Musical, Storico e fantasy	How I Met Your Mother, Shadowhunters, Peaky Blinders, Penny Dreadful	Piattaforme On-Demand (Sky Online, Infinity, Netflix, Mediaset Premium, NowTV, TimVision), Streaming on-line	Si	Solo	Pomeriggio (13:00-18:00), Sera (18:00-00:00), Notte (00:00-6:00)	Si, in entrambi i pasti	Sempre	Sempre	Quasi Mai	7	10+	10	7	34	15	7	1	57	MODERATE_BW	11	12	12	35	68	24	67
79	18	Female	1.63	60	22.5827	Single	Laurea Triennale	16	Studente/ssa	1	Genitori	1	1	5	5	Pomeriggio (13:00-18:00)	No	Si	Si	2 ore ma dipende dal giorno	Sempre	Spesso	Avventura, Fantascientifiche	The vampire diaries, Lucifer e Once Upon A Time	Streaming on-line	No	Solo	Mattina (6:00-13:00), Pomeriggio (13:00-18:00), Sera (18:00-00:00)	No	Quasi Mai	Mai	Sempre	1	10+	4 ore	2	31	8	5	13	57	MODERATE_BW	31	21	27	79	75	36	53
80	18	Female	1.7	70	24.2215	Single	Licenza Media	8	Studente/ssa	1	Genitori	5	10	16	3	Mattina (6:00-13:00), Pomeriggio (13:00-18:00), Sera (18:00-00:00), Notte (00:00-6:00)	Si, in entrambi i pasti	No	Si	4	Qualche volta	Raramente	Thriller, Drama, Avventura, Commedia, Anime, Biografiche, Documentaristiche, Fantascientifiche, Horror, Medical Drama, Crime, Musical, Serie Animate	Agents of shield, grey's anatomy, game of thrones, lost, friends,	Televisore, Piattaforme On-Demand (Sky Online, Infinity, Netflix, Mediaset Premium, NowTV, TimVision), Streaming on-line	Si	Solo	Pomeriggio (13:00-18:00), Sera (18:00-00:00), Notte (00:00-6:00)	Si, solo a pranzo	Spesso	Spesso	Sempre	7	10+	12	3	33	9	9	7	58	MODERATE_BW	12	14	15	41	33	1	10
81	18	Female	1.67	56	20.0796	Fidanzato/a	Licenza Media	8	Studente/ssa	1	Genitori	2	5	5	1	Pomeriggio (13:00-18:00), Sera (18:00-00:00), Notte (00:00-6:00)	No	No	Si	2	Raramente	Raramente	Thriller, Drama, Commedia, Biografiche, Documentaristiche, Medical Drama, storiche	peaky blinders, sherlock, friends	Piattaforme On-Demand (Sky Online, Infinity, Netflix, Mediaset Premium, NowTV, TimVision), Streaming on-line	Si	Solo	Sera (18:00-00:00), Notte (00:00-6:00)	No	Spesso	Spesso	Sempre	5	3	2	2	26	18	11	4	59	MODERATE_BW	34	23	19	76	73	37	102
82	18	Female	1.63	65	24.4646	Single	Diploma	13	Studente/ssa	1	Genitori	2	35	20	1	Pomeriggio (13:00-18:00)	Si, solo a pranzo	No	Si	3 ore	Spesso	Spesso	Thriller, Drama, Commedia, Anime, Documentaristiche, Medical Drama, Crime, Serie Animate	Rupaul's drag race Brooklyn nine nine bojack horseman Wynonna earp	Piattaforme On-Demand (Sky Online, Infinity, Netflix, Mediaset Premium, NowTV, TimVision), Streaming on-line	Si	Solo	Pomeriggio (13:00-18:00), Sera (18:00-00:00)	Si, solo a cena	Sempre	Sempre	Qualche Volta	5	3	3/4	4	31	14	12	2	59	MODERATE_BW	18	17	23	58	66	37	78
83	18	Female	1.66	60	21.7738	Single	Diploma	13	Studente/ssa	0	Genitori	1	3	3	1	Sera (18:00-00:00)	No	Si	Si	5	Spesso	Spesso	Thriller, Drama, Avventura, Commedia, Biografiche, Horror, Medical Drama, Crime, Musical, Western	Grey's anatomy, Riverdale, Lucifer	Piattaforme On-Demand (Sky Online, Infinity, Netflix, Mediaset Premium, NowTV, TimVision), Streaming on-line	Si	Solo	Sera (18:00-00:00)	Si, in entrambi i pasti	Spesso	Spesso	Quasi Mai	7	10+	14	6	30	15	9	5	59	MODERATE_BW	24	20	21	65	62	25	74
84	18	Female	1.8	68	20.9877	Single	Licenza Media	13	Studente/ssa	1	Genitori	2	9	10	5	Sera (18:00-00:00), Notte (00:00-6:00)	Si, in entrambi i pasti	Si	Si	8	Spesso	Sempre	Thriller, Drama, Commedia, Fantascientifiche	teen wolf, orange is the new black, pretty little liars, stranger things, 2 broke girls	Televisore, Piattaforme On-Demand (Sky Online, Infinity, Netflix, Mediaset Premium, NowTV, TimVision)	Si	Solo	Pomeriggio (13:00-18:00), Sera (18:00-00:00), Notte (00:00-6:00)	No	Sempre	Sempre	Sempre	7	3	5 ore	7	26	11	11	12	60	MODERATE_BW	16	14	18	48	32	3	17
85	18	Female	1.65	57	20.9366	Single	Diploma	13	Studente/ssa	1	Genitori	2	1	7	1	Sera (18:00-00:00)	No	Si	Si	1,30 ore	Raramente	Raramente	Drama, Horror	American Horror Story Stranger things Riverdale Santa Clarita diet	Streaming on-line	No	Solo	Sera (18:00-00:00)	No	Sempre	Sempre	Spesso	1	3	2 ore	2	38	8	11	3	60	MODERATE_BW	27	17	19	63	60	34	57
86	18	Female	1.58	46.6	18.6669	Single	Licenza Media	8	Studente/ssa	0	Genitori	2	3	5	0	Pomeriggio (13:00-18:00), Sera (18:00-00:00), Notte (00:00-6:00)	Si, solo a pranzo	Si	Si	5 ore	Qualche volta	Qualche volta	Thriller, Avventura, Anime, Fantascientifiche, Medical Drama	Le regole del delitto prefetto, American Horror Story, La Casa di Carta	Streaming on-line	Si	Solo	Pomeriggio (13:00-18:00), Sera (18:00-00:00), Notte (00:00-6:00)	Si, solo a pranzo	Spesso	Quasi Mai	Quasi Mai	2	6	6	3	23	18	10	9	60	MODERATE_BW	26	19	17	62	67	28	119
87	18	Female	1.65	50	18.3655	Single	Diploma	15	Studente/ssa	1	Genitori	4	8	8	1	Sera (18:00-00:00), Notte (00:00-6:00)	No	No	Si	4 ore	Qualche volta	Raramente	Drama, Avventura, Anime, Fantascientifiche	How to get away whit murder, teen wolf, shameless	Piattaforme On-Demand (Sky Online, Infinity, Netflix, Mediaset Premium, NowTV, TimVision), Streaming on-line	Si	Solo	Sera (18:00-00:00), Notte (00:00-6:00)	No	Spesso	Spesso	Sempre	5	8	6	5	20	20	12	9	61	MODERATE_BW	23	17	15	55	43	13	5
88	18	Female	1.64	60.6	22.5312	Single	Licenza Media	8	Studente/ssa	1	Genitori	3	50	70	3	Sera (18:00-00:00)	Si, in entrambi i pasti	No	Si	3/4 ore	Qualche volta	Spesso	Thriller, Drama, Avventura, Commedia, Anime, Fantascientifiche, Horror, Medical Drama, Crime, Musical, Serie Animate, Fantasy/Korean Drama	Game of Thrones, Once upon a time, iZombie, New Girl, Grey's Anatomy, CSI, NCIS, Criminal minds, Stranger things, Good Witch, The Vampire Diaries, Teen Wolf, Sword art online, Toradora, Tokyo Ghoul	Televisore, Piattaforme On-Demand (Sky Online, Infinity, Netflix, Mediaset Premium, NowTV, TimVision), Streaming on-line	Si	Solo	Pomeriggio (13:00-18:00), Sera (18:00-00:00), Notte (00:00-6:00)	Si, in entrambi i pasti	Spesso	Sempre	Spesso	7	7	4:30	7	30	15	6	10	61	MODERATE_BW	31	24	27	82	68	24	80
89	18	Female	1.62	48	18.2899	Single	Licenza Media	8	Studente/ssa	0	Genitori	1	3	6	0	Pomeriggio (13:00-18:00), Sera (18:00-00:00)	No	No	Si	3	Spesso	Spesso	Drama, Avventura, Commedia, Crime	Modern Family The walking dead friends	Piattaforme On-Demand (Sky Online, Infinity, Netflix, Mediaset Premium, NowTV, TimVision)	Si	Solo	Pomeriggio (13:00-18:00), Sera (18:00-00:00), Notte (00:00-6:00)	No	Qualche Volta	Spesso	Quasi Mai	5	8	4	2	31	17	10	4	62	MODERATE_BW	28	21	20	69	52	18	76
90	18	Female	1.67	66	23.6652	Single	Licenza Media	13	Studente/ssa	0	Genitori	1	50	36	6	Pomeriggio (13:00-18:00), Sera (18:00-00:00)	No	No	Si	6-7 ore	Qualche volta	Qualche volta	Drama, Avventura, Fantascientifiche, Serie Animate	Shadowhunters The originals Game of throne Lucifer Thi is use Supergirl Vikings Umbrella Accademy Van halsing	Streaming on-line, Netflix	Si	Solo	Pomeriggio (13:00-18:00), Sera (18:00-00:00)	No	Spesso	Spesso	Quasi Mai	7	9	8- 9 ore	5	32	13	7	10	62	MODERATE_BW	22	22	24	68	57	6	88
91	18	Female	1.69	55	19.257	Single	Diploma	13	Studente/ssa	0	Genitori	4	4	10	1	Sera (18:00-00:00)	Si, solo a cena	No	Si	Molto	Qualche volta	Spesso	Drama, Avventura, Commedia	The vampire diaries La casa di carta Game of thrones	Piattaforme On-Demand (Sky Online, Infinity, Netflix, Mediaset Premium, NowTV, TimVision)	Si	Solo	Sera (18:00-00:00)	No	Spesso	Spesso	Quasi Mai	7	2	2	7	26	14	10	12	62	MODERATE_BW	22	18	19	59	58	15	54
92	18	Female	1.57	41	16.6335	Single	Diploma	15	Studente/ssa	1	Genitori	5	6	10	0	Pomeriggio (13:00-18:00), Sera (18:00-00:00)	No	Si	Si	3/4 ore	Spesso	Sempre	Thriller, Drama, Avventura, Commedia, Horror, Medical Drama, Crime, Western, Storiche	Peaky Blinders, Game of Thrones, Alias Grace, Shameless, Skam	Piattaforme On-Demand (Sky Online, Infinity, Netflix, Mediaset Premium, NowTV, TimVision), Streaming on-line	Si	Solo	Pomeriggio (13:00-18:00), Sera (18:00-00:00), Notte (00:00-6:00)	Si, solo a cena	Spesso	Sempre	Quasi Mai	4	4	3	5	32	12	9	9	62	MODERATE_BW	29	22	23	74	57	24	83
93	18	Female	1.6	55	21.4844	Single	Licenza Media	10	Studente/ssa	0	Genitori	1	2	12	1	Sera (18:00-00:00)	Si, solo a cena	No	Si	2 ore	Spesso	Spesso	Fantascientifiche	Sherlock, Il Trono di Spade, Stranger Things	Piattaforme On-Demand (Sky Online, Infinity, Netflix, Mediaset Premium, NowTV, TimVision)	Si	Fratello	Sera (18:00-00:00)	No	Qualche Volta	Quasi Mai	Spesso	2	3	3 ore	2	28	17	9	9	63	MODERATE_BW	20	17	12	49	70	31	86
94	18	Female	1.78	58	18.3058	Fidanzato/a	Licenza Media	8	Studente/ssa	1	Genitori	1	7		0	Sera (18:00-00:00), Notte (00:00-6:00)	No	No	Si	2	Mai	Raramente	Thriller, Drama, Documentaristiche, Fantascientifiche, Medical Drama, Crime	Breakig bad, Scrubs, Supernatural	Piattaforme On-Demand (Sky Online, Infinity, Netflix, Mediaset Premium, NowTV, TimVision), Streaming on-line	Si	Solo	Sera (18:00-00:00)	No	Sempre	Sempre	Sempre	4	6	12	4	27	19	12	6	64	MODERATE_BW	21	24	14	59	40	11	110
95	18	Female	1.65	70	25.7117	Single	Diploma	13	Studente/ssa	1	Genitori	1	6	45	1	Sera (18:00-00:00), Notte (00:00-6:00)	No	Si	Si	4	Spesso	Spesso	Drama, Anime, Fantascientifiche, Crime	Black mirror,lucifer,sense8	Piattaforme On-Demand (Sky Online, Infinity, Netflix, Mediaset Premium, NowTV, TimVision), Streaming on-line	Si	Solo	Mattina (6:00-13:00), Pomeriggio (13:00-18:00), Sera (18:00-00:00), Notte (00:00-6:00)	Si, in entrambi i pasti	Sempre	Spesso	Mai	5	10+	6	3	29	16	10	9	64	MODERATE_BW	28	22	12	62	66	35	70
96	18	Female	1.6	50	19.5312	Single	Licenza Media	11	Studente/ssa	1	Genitori	2	4	24	1	Pomeriggio (13:00-18:00), Notte (00:00-6:00)	Si, in entrambi i pasti	No	Si	4	Qualche volta	Spesso	Thriller, Drama, Avventura, Horror, Crime	The walking dead, teen wolf, skam	Televisore	No	Solo	Pomeriggio (13:00-18:00), Notte (00:00-6:00)	No	Spesso	Qualche Volta	Mai	3	6	8	1	32	14	10	8	64	MODERATE_BW	25	25	25	75	51	17	94
97	18	Female	1.6	55	21.4844	Single	Diploma	13	Studente/ssa	1	Genitori	2	20	20	0.5	Sera (18:00-00:00)	No	No	Si	6	Raramente	Spesso	Drama, Avventura, Commedia, Biografiche, Documentaristiche, Medical Drama, Crime, Musical	la casa de papel, designated survivor, la mafia uccide solo d’estate, orange is the new black, glee, grey’s anatomy, gilmore girls, shameless	Streaming on-line	No	Solo	Pomeriggio (13:00-18:00), Sera (18:00-00:00), Notte (00:00-6:00)	Si, solo a pranzo	Sempre	Sempre	Sempre	4	7	7	3	34	13	8	9	64	MODERATE_BW	21	21	20	62	61	16	83
98	18	Female	1.56	53	21.7784	Single	Licenza Media	8	Studente/ssa	0	Genitori	2	25	7	3	Sera (18:00-00:00)	Si, in entrambi i pasti	No	Si	2	Qualche volta	Qualche volta	Drama, Avventura, Anime, Fantascientifiche, Medical Drama, Crime	Game of Thrones, Doctor who, teen wolf, the vampire diaries, C.S.I.	Streaming on-line	No	Solo	Pomeriggio (13:00-18:00), Sera (18:00-00:00), Notte (00:00-6:00)	Si, solo a cena	Spesso	Sempre	Quasi Mai	3	10+	11	2	31	17	9	8	65	MODERATE_BW	31	22	16	69	76	35	85
99	18	Female	1.65	70	25.7117	Single	Diploma	13	Studente/ssa	0	Genitori	1	10	10	0	Sera (18:00-00:00)	No	No	Si	5	Qualche volta	Qualche volta	Thriller, Drama, Avventura, Commedia, Fantascientifiche, Horror, Medical Drama, Crime, Musical, Serie Animate	Teen wolf, the vampire diaries, the 100, pretty little liars, grey'anatomy, lucifer, gotham, rise, shadowhunters, riverdale, supergirl, the flash, arrow, legends of tomorrow, Izombie, 13, una serie di sfortunati eventi, atypical, awkward, better call saul, breaking bad, everything sucks, eyewitness, faking it, gossip girl, killing eve, life sentence, daredevil, agents of shield, mr robot, once up…	Streaming on-line	Si	Solo	Pomeriggio (13:00-18:00), Sera (18:00-00:00)	Si, solo a pranzo	Sempre	Sempre	Qualche Volta	7	5	4	7	33	13	11	9	66	MODERATE_BW	35	19	24	78	65	51	73
100	18	Female	1.67	54	19.3625	Single	Diploma	13	Studente/ssa	0	Solo	0	1	100	6	Pomeriggio (13:00-18:00), Sera (18:00-00:00)	Si, in entrambi i pasti	No	Si	5	Qualche volta	Qualche volta	Thriller, Avventura, Commedia, Anime, Fantascientifiche	Once upon a time, don't trust the b***h in apartament 32,tokyo ghoul	Piattaforme On-Demand (Sky Online, Infinity, Netflix, Mediaset Premium, NowTV, TimVision), Streaming on-line	Si	Solo	Pomeriggio (13:00-18:00), Sera (18:00-00:00)	No	Sempre	Sempre	Quasi Mai	6	8	9	4	35	15	6	10	66	MODERATE_BW	30	21	20	71	72	55	119
101	18	Female	1.6	58	22.6562	Single	Licenza Media	8	Studente/ssa	0	Genitori	4	1	7	2	Sera (18:00-00:00)	Si, in entrambi i pasti	Si	Si	Abbastanza	Qualche volta	Spesso	Commedia, Horror, Medical Drama, Crime	Quantico, scorpions, suburra	Streaming on-line	Si	Solo	Pomeriggio (13:00-18:00)	Si, solo a pranzo	Sempre	Spesso	Spesso	3	10+	5	2	31	17	6	12	66	MODERATE_BW	13	12	24	49	56	31	36
102	18	Female	1.68	50	17.7154	Single	Diploma	13	Lavoro Fisico	1	Genitori	1	7	14	5	Sera (18:00-00:00)	Si, solo a cena	No	Si	6 ore	Sempre	Sempre	Thriller, Drama, Avventura, Commedia, Fantascientifiche, Horror, Medical Drama, Crime, Musical	Revenge, Once Upon A Time, Grey’s Anatomy	Televisore, Piattaforme On-Demand (Sky Online, Infinity, Netflix, Mediaset Premium, NowTV, TimVision), Streaming on-line, DVD	Si	Solo	Pomeriggio (13:00-18:00), Sera (18:00-00:00)	Si, solo a cena	Sempre	Sempre	Qualche Volta	7	10+	6	7	38	16	12	0	66	MODERATE_BW	35	25	21	81	65	21	118
103	18	Female	1.69	57	19.9573	Single	Diploma	13	Studente/ssa	1	Genitori	2	12	3	3	Sera (18:00-00:00)	Si, in entrambi i pasti	No	Si	Quattordici ore	Spesso	Spesso	Thriller, Drama, Avventura, Anime, Fantascientifiche, Crime, Serie Animate	Victoria, The Gifted, Teen wolf, Merlin, The Mick, The 100, iZombie, The Originals	Streaming on-line	No	Solo	Sera (18:00-00:00), Notte (00:00-6:00)	Si, in entrambi i pasti	Sempre	Spesso	Qualche Volta	7	9	6h 40 min	7	30	16	9	11	66	MODERATE_BW	30	22	23	75	51	29	60
104	18	Female	1.75	75	24.4898	Fidanzato/a	Diploma	13	Studente/ssa	1	Genitori	0	3		0.5	Pomeriggio (13:00-18:00), Sera (18:00-00:00)	No	No	Si	3 ore se ho poco tempo	Raramente	Raramente	Avventura, Fantascientifiche	Once upon a time stranger things una serie di sfortunati eventi	Piattaforme On-Demand (Sky Online, Infinity, Netflix, Mediaset Premium, NowTV, TimVision)	Si	Solo	Pomeriggio (13:00-18:00), Sera (18:00-00:00)	No	Sempre	Sempre	Spesso	4	9	Più di 6	4	37	12	12	6	67	MODERATE_BW	14	5	19	38	39	9	14
105	18	Female	1.53	45	19.2234	Single	Licenza Media	8	Studente/ssa	1	Genitori	2	4	10	1	Pomeriggio (13:00-18:00), Sera (18:00-00:00)	Si, in entrambi i pasti	No	Si	2 ore o 3	Qualche volta	Raramente	Anime, Fantascientifiche, Teen Drama	The 100, Toradora!, The Big Bang Theory, Pretty Little Liars, Stranger Things, Sword Art Online, Noragami, The seven deadly sins, Riverdale, Una serie di sfortunati eventi e molte altre	Piattaforme On-Demand (Sky Online, Infinity, Netflix, Mediaset Premium, NowTV, TimVision), Streaming on-line	Si	Con mia sorella gemella	Pomeriggio (13:00-18:00), Sera (18:00-00:00)	No	Sempre	Sempre	Mai	5	8	4	4	37	14	5	11	67	MODERATE_BW	32	19	19	70	75	48	110
106	18	Female	1.72	62	20.9573	Single	Diploma	12	Studente/ssa	1	Genitori	2	11	20	0.5	Pomeriggio (13:00-18:00), Sera (18:00-00:00)	No	Si	Si	2 ore	Qualche volta	Qualche volta	Thriller, Drama, Avventura, Commedia, Anime, Fantascientifiche, Horror, Medical Drama, Crime, Serie Animate	New girl Teen Wolf Grey’s anatomy	Piattaforme On-Demand (Sky Online, Infinity, Netflix, Mediaset Premium, NowTV, TimVision), Streaming on-line, DVD	Si	Solo	Sera (18:00-00:00), Notte (00:00-6:00)	No	Sempre	Sempre	Sempre	4	10+	10	3	32	15	12	8	67	MODERATE_BW	7	9	20	36	32	3	6
107	18	Female	1.65	59.5	21.8549	Fidanzato/a	Diploma	13	Studente/ssa	0	Genitori	0			0	Mattina (6:00-13:00), Pomeriggio (13:00-18:00), Sera (18:00-00:00), Notte (00:00-6:00)	No	No	Si	anche tutta la giornata	Spesso	Spesso	Drama, Avventura, Fantascientifiche, Crime	criminal minds, the 100, la casa di carta	Televisore, Piattaforme On-Demand (Sky Online, Infinity, Netflix, Mediaset Premium, NowTV, TimVision), Streaming on-line	Si	Solo	Mattina (6:00-13:00), Pomeriggio (13:00-18:00), Sera (18:00-00:00), Notte (00:00-6:00)	Si, in entrambi i pasti	Sempre	Sempre	Sempre	7	10+	12	7	35	17	5	10	67	MODERATE_BW	18	24	26	68	44	5	32
108	18	Female	1.64	63	23.4236	Single	Diploma	13	Studente/ssa	0	Genitori	12	14	40	0.5	Pomeriggio (13:00-18:00), Sera (18:00-00:00)	Si, solo a cena	Si	Si	5-6 ore	Qualche volta	Raramente	Avventura, Fantascientifiche, Horror, Serie Animate	once upon a time, game of thrones, under the dome, black mirror, pretty little liars e teen wolf	Piattaforme On-Demand (Sky Online, Infinity, Netflix, Mediaset Premium, NowTV, TimVision), Streaming on-line	Si	Solo	Pomeriggio (13:00-18:00), Sera (18:00-00:00)	Si, solo a cena	Sempre	Spesso	Mai	4	6	6	4	35	16	9	8	68	MODERATE_BW	29	22	25	76	69	35	65
109	19	Female	1.7	65	22.4913	Single	Diploma	12	Studente/ssa	1	Genitori	1	1	7	1	Pomeriggio (13:00-18:00), Notte (00:00-6:00)	Si, in entrambi i pasti	Si	Si	3	Raramente	Raramente	Avventura, Commedia, Fantascientifiche, Medical Drama, Musical, Western	Game of thrones, Orange is the new black, Glee, The night shift, The L word, Once upon a time	Televisore, Piattaforme On-Demand (Sky Online, Infinity, Netflix, Mediaset Premium, NowTV, TimVision), Streaming on-line	Si	Solo	Pomeriggio (13:00-18:00), Sera (18:00-00:00), Notte (00:00-6:00)	No	Spesso	Sempre	Quasi Mai	4	2	2	2	23	14	7	8	52	MODERATE_BW	30	24	19	73	69	17	81
110	19	Female	1.71	62	21.2031	Single	Diploma	13	Studente/ssa	1	Appartamento Condiviso	3	3	8	1	Sera (18:00-00:00)	Si, solo a cena	No	Si	4-5	Spesso	Spesso	Drama, Commedia, Anime, Biografiche, Fantascientifiche, Musical	Friends, Sherlock, Death Note	Piattaforme On-Demand (Sky Online, Infinity, Netflix, Mediaset Premium, NowTV, TimVision)	Si	Solo	Sera (18:00-00:00)	Si, in entrambi i pasti	Sempre	Sempre	Mai	3	10+	12	2	30	11	8	3	52	MODERATE_BW	25	8	15	48	52	6	73
111	19	Female	1.81	61	18.6197	Single	Laurea Triennale	13	Studente/ssa	0	Genitori	1	6	10	2	Pomeriggio (13:00-18:00), Sera (18:00-00:00)	Si, solo a pranzo	No	Si	3	Qualche volta	Raramente	Thriller, Drama, Commedia	New girl Orange is the New black The big band theory	Piattaforme On-Demand (Sky Online, Infinity, Netflix, Mediaset Premium, NowTV, TimVision), Streaming on-line	Si	Solo	Mattina (6:00-13:00), Pomeriggio (13:00-18:00), Sera (18:00-00:00)	No	Spesso	Spesso	Sempre	6	4	2	6	23	11	10	8	52	MODERATE_BW	13	14	28	55	53	11	38
112	19	Female	1.8	70	21.6049	Fidanzato/a	Diploma	13	Studente/ssa	1	Genitori	0		24	3	Sera (18:00-00:00)	No	Si	Si	3	Qualche volta	Spesso	Thriller, Avventura, Commedia, Anime, Biografiche, Fantascientifiche, Musical	Supernatural, Brooklyn nine-nine, New Girl	Piattaforme On-Demand (Sky Online, Infinity, Netflix, Mediaset Premium, NowTV, TimVision), Streaming on-line	Si	Con il partner	Mattina (6:00-13:00), Pomeriggio (13:00-18:00), Sera (18:00-00:00)	No	Spesso	Spesso	Mai	1	10+	4	2	26	12	8	8	54	MODERATE_BW	25	20	20	65	57	19	79
113	19	Female	1.63	50	18.8189	Single	Diploma	13	Lavoro Fisico	0	Genitori	2	6	15	1	Pomeriggio (13:00-18:00)	Si, in entrambi i pasti	No	Si	3	Raramente	Raramente	Avventura, Fantascientifiche	Teen Wolf Orphan Black La Casa De Papel	Piattaforme On-Demand (Sky Online, Infinity, Netflix, Mediaset Premium, NowTV, TimVision)	Si	Solo	Pomeriggio (13:00-18:00), Sera (18:00-00:00)	No	Spesso	Spesso	Qualche Volta	4	8	5	3	25	14	6	9	54	MODERATE_BW	22	14	20	56	52	1	24
114	19	Female	1.65	50	18.3655	Fidanzato/a	Dottorato o Specializzazione	24	Lavoro Fisico	1	avete rotto il caaazz	0	2	5	0	Sera (18:00-00:00)	Si, solo a cena	No	Si	penso anche 15 ore se faccio una maratona:))	Spesso	Sempre	Commedia	friends e how I met your mother (DUE CAPOLAVORI😍)	Piattaforme On-Demand (Sky Online, Infinity, Netflix, Mediaset Premium, NowTV, TimVision)	Si	Solo	Mattina (6:00-13:00), Pomeriggio (13:00-18:00), Sera (18:00-00:00)	Si, in entrambi i pasti	Sempre	Sempre	Sempre	5	8	6 minimo	6	33	10	7	4	54	MODERATE_BW	22	13	27	62	51	15	23
115	19	Female	1.67	68	24.3824	Single	Licenza Media	8	Studente/ssa	1	Genitori	1	28	14	0	Pomeriggio (13:00-18:00), Sera (18:00-00:00)	Si, in entrambi i pasti	Si	Si	moltissimo	Spesso	Spesso	Thriller, Drama, Avventura, Commedia, Biografiche, Fantascientifiche, Horror, Medical Drama, Crime	grey’s anatomy, pretty little liars, stranger things, teen wolf, friends, the 100,	Piattaforme On-Demand (Sky Online, Infinity, Netflix, Mediaset Premium, NowTV, TimVision), Streaming on-line	Si	Solo	Pomeriggio (13:00-18:00), Sera (18:00-00:00)	Si, in entrambi i pasti	Sempre	Sempre	Qualche Volta	7	8	7 ore	7	31	9	10	5	55	MODERATE_BW	27	20	19	66	47	8	53
116	19	Female	1.67	68	24.3824	Single	Licenza Media	8	Studente/ssa	1	Genitori	1	28	14	0	Pomeriggio (13:00-18:00), Sera (18:00-00:00)	Si, in entrambi i pasti	Si	Si	moltissimo	Spesso	Spesso	Thriller, Drama, Avventura, Commedia, Biografiche, Fantascientifiche, Horror, Medical Drama, Crime	grey’s anatomy, pretty little liars, stranger things, teen wolf, friends, the 100,	Piattaforme On-Demand (Sky Online, Infinity, Netflix, Mediaset Premium, NowTV, TimVision), Streaming on-line	Si	Solo	Pomeriggio (13:00-18:00), Sera (18:00-00:00)	Si, in entrambi i pasti	Sempre	Sempre	Qualche Volta	7	8	7 ore	7	31	9	10	5	55	MODERATE_BW	27	20	19	66	47	8	53
117	19	Female	1.58	60	24.0346	Fidanzato/a	Licenza Media	8	Studente/ssa	0	Genitori	2	7	90	1	Sera (18:00-00:00)	Si, in entrambi i pasti	No	Si	3	Sempre	Sempre	Thriller, Drama, Avventura, Commedia, Anime, Documentaristiche, Fantascientifiche, Horror, Crime, Musical, Serie Animate	Once Upon A Time Game Of Thrones The Walking Dead	Piattaforme On-Demand (Sky Online, Infinity, Netflix, Mediaset Premium, NowTV, TimVision), Streaming on-line	Si	Solo	Pomeriggio (13:00-18:00)	Si, solo a pranzo	Sempre	Sempre	Spesso	2	2	4	3	28	12	9	6	55	MODERATE_BW	31	24	19	74	65	26	70
118	19	Female	1.64	67	24.9108	Single	Diploma	13	Studente/ssa	0	Genitori	5	10	55	1	Pomeriggio (13:00-18:00), Sera (18:00-00:00)	Si, in entrambi i pasti	No	Si	2	Sempre	Spesso	Thriller, Avventura, Commedia, Biografiche, Documentaristiche, Fantascientifiche, Horror, Crime, Musical, Serie Animate	Supernatural; this is us; 11/22/63; game of thrones; il cacciatore; la mafia uccide solo d'estate	Streaming on-line	No	Solo	Pomeriggio (13:00-18:00)	No	Sempre	Sempre	Sempre	2	2	2	2	35	8	11	2	56	MODERATE_BW	33	18	16	67	63	15	97
119	19	Female	1.68	50	17.7154	Single	Diploma	13	Studente/ssa	0	Genitori	1	15	5	1	Pomeriggio (13:00-18:00)	No	No	Si	6	Mai	Mai	Thriller, Drama, Commedia, Biografiche, Documentaristiche, Fantascientifiche, Crime, Serie Animate	Breaking bad Bojack horseman The big bang theory	Televisore	No	Solo	Pomeriggio (13:00-18:00), Sera (18:00-00:00)	No	Spesso	Spesso	Qualche Volta	6	8	5	7	29	9	9	9	56	MODERATE_BW	15	17	25	57	61	21	101
120	19	Female	1.7	55	19.0311	Single	Diploma	13	Studente/ssa	1	Appartamento Condiviso	1	7	10	1	Sera (18:00-00:00)	No	Si	Si	2 ore	Qualche volta	Raramente	Thriller, Avventura, Fantascientifiche, Crime	The gifted, Le regole del delitto perfetto, Shameless, Agents of Shield	Piattaforme On-Demand (Sky Online, Infinity, Netflix, Mediaset Premium, NowTV, TimVision)	Si	Solo	Sera (18:00-00:00)	No	Sempre	Sempre	Spesso	4	3	2	5	29	11	10	7	57	MODERATE_BW	10	6	16	32	49	7	43
121	19	Female	1.6	50	19.5312	Single	Diploma	13	Studente/ssa	0	Appartamento Condiviso	2			0	Pomeriggio (13:00-18:00), Sera (18:00-00:00)	Si, solo a cena	No	Si	3/4 ore	Sempre	Sempre	Drama, Fantascientifiche, Crime, Musical	Once upon a time, lucifer, supergirl	Streaming on-line	No	Solo	Pomeriggio (13:00-18:00), Sera (18:00-00:00)	Si, solo a cena	Sempre	Sempre	Spesso	2	3	3/4	1	31	11	9	7	58	MODERATE_BW	15	14	19	48	45	3	69
122	19	Female	1.8	75	23.1481	Single	Diploma	13	Studente/ssa	1	Genitori	4	25	10	1	Mattina (6:00-13:00), Pomeriggio (13:00-18:00), Sera (18:00-00:00), Notte (00:00-6:00)	Si, in entrambi i pasti	No	Si	Piú tempo possibile	Qualche volta	Qualche volta	Thriller, Drama, Avventura, Commedia, Anime, Biografiche, Fantascientifiche, Horror, Medical Drama, Crime, Serie Animate	Supernatural,Riverdale,Resident	Televisore, Piattaforme On-Demand (Sky Online, Infinity, Netflix, Mediaset Premium, NowTV, TimVision), Streaming on-line	Si	Solo	Mattina (6:00-13:00), Pomeriggio (13:00-18:00), Sera (18:00-00:00), Notte (00:00-6:00)	Si, in entrambi i pasti	Sempre	Sempre	Spesso	7	10+	8 ore o piú	7	34	14	5	6	59	MODERATE_BW	22	14	17	53	56	30	68
123	19	Female	1.63	59	22.2063	Fidanzato/a	Diploma	13	Studente/ssa	1	Genitori	1	7	2	1	Pomeriggio (13:00-18:00), Sera (18:00-00:00)	Si, in entrambi i pasti	No	Si	4	Spesso	Qualche volta	Drama, Avventura, Commedia, Fantascientifiche, Serie Animate, Comico	Sense 8 modern family supernatural	Televisore, Piattaforme On-Demand (Sky Online, Infinity, Netflix, Mediaset Premium, NowTV, TimVision)	Si	Solo	Pomeriggio (13:00-18:00), Sera (18:00-00:00)	Si, solo a pranzo	Qualche Volta	Spesso	Mai	4	3	4	2	30	10	10	10	60	MODERATE_BW	23	22	18	63	60	20	70
124	19	Female	1.72	52	17.5771	Fidanzato/a	Diploma	13	Studente/ssa	0	Appartamento Condiviso	1	2	15	1	Sera (18:00-00:00)	No	No	Si	2	Qualche volta	Qualche volta	Thriller, Avventura, Commedia, Crime	The big bang theory The magicians New girl	Piattaforme On-Demand (Sky Online, Infinity, Netflix, Mediaset Premium, NowTV, TimVision), Streaming on-line	Si	Solo	Pomeriggio (13:00-18:00)	Si, solo a pranzo	Spesso	Sempre	Spesso	6	4	2	5	30	14	9	7	60	MODERATE_BW	14	18	21	53	47	14	65
125	19	Female	1.69	64	22.4082	Single	Diploma	13	Studente/ssa	0	Appartamento Condiviso	1	2	5	0	Sera (18:00-00:00)	No	No	Si	2 ore	Mai	Raramente	Drama, Commedia, Fantascientifiche, Medical Drama, Crime	Grey's anatomy, The 100, Dc legends of tomorrow	Piattaforme On-Demand (Sky Online, Infinity, Netflix, Mediaset Premium, NowTV, TimVision), Streaming on-line	Si	Solo	Sera (18:00-00:00)	Si, solo a pranzo	Sempre	Sempre	Qualche Volta	2	5	4 ore	2	30	13	10	7	60	MODERATE_BW	15	11	22	48	45	11	78
126	19	Female	1.63	53	19.9481	Single	Diploma	13	Disoccupato/a	0	Genitori	0	0		5	Pomeriggio (13:00-18:00), Sera (18:00-00:00)	Si, in entrambi i pasti	No	Si	5 h	Qualche volta	Raramente	Fantascientifiche, Crime	desperate housewives game of thrones grey's anatomy	Televisore	No	Solo	Pomeriggio (13:00-18:00)	Si, in entrambi i pasti	Spesso	Spesso	Mai	5	7	280	5	34	17	5	5	61	MODERATE_BW	31	20	15	66	77	48	113
127	19	Female	1.6	45	17.5781	Single	Diploma	13	Lavoro Fisico	1	Genitori	4	3		4	Mattina (6:00-13:00), Pomeriggio (13:00-18:00), Sera (18:00-00:00), Notte (00:00-6:00)	Si, solo a pranzo	Si	Si	5 ore	Spesso	Sempre	Thriller, Drama, Avventura, Commedia, Anime, Horror, Medical Drama, Crime, Serie Animate	How I met your mother La casa di carta The middle	Piattaforme On-Demand (Sky Online, Infinity, Netflix, Mediaset Premium, NowTV, TimVision)	Si	Solo	Notte (00:00-6:00)	Si, in entrambi i pasti	Sempre	Sempre	Mai	7	10+	8	7	30	18	12	2	62	MODERATE_BW	33	18	16	67	57	18	121
128	19	Female	1.6	50	19.5312	Single	Licenza Media	13	Studente/ssa	0	Genitori	2	10	4	3	Pomeriggio (13:00-18:00), Sera (18:00-00:00)	Si, in entrambi i pasti	No	Si	2	Raramente	Raramente	Thriller, Drama, Horror, Serie Animate	the originals, once upon a time, shadowhunters	Streaming on-line	No	Solo	Pomeriggio (13:00-18:00), Sera (18:00-00:00)	No	Spesso	Spesso	Qualche Volta	3	3	2	4	31	11	11	9	62	MODERATE_BW	13	16	21	50	53	14	64
129	19	Female	1	45	45	Fidanzato/a	Diploma	13	Studente/ssa	1	Genitori	1	4	15	1	Pomeriggio (13:00-18:00), Sera (18:00-00:00)	No	Si	Si	3	Sempre	Sempre	Thriller, Drama, Avventura, Fantascientifiche, Horror, Medical Drama, Crime, Western, Serie Animate	Grey’s anatomy Breaking bad The walking dead	Televisore, Piattaforme On-Demand (Sky Online, Infinity, Netflix, Mediaset Premium, NowTV, TimVision), Streaming on-line	Si	Solo	Pomeriggio (13:00-18:00), Sera (18:00-00:00), Notte (00:00-6:00)	No	Spesso	Spesso	Qualche Volta	7	4	4	7	29	15	9	10	63	MODERATE_BW	30	23	18	71	64	34	68
130	19	Female	1.76	60	19.3698	Single	Diploma	13	Studente/ssa	1	Genitori	1	4	6	1	Sera (18:00-00:00)	Si, solo a cena	No	Si	4 ore	Qualche volta	Spesso	Thriller, Avventura, Fantascientifiche, Crime	Teen wolf, limitless, sherlock, how i met your mother	Piattaforme On-Demand (Sky Online, Infinity, Netflix, Mediaset Premium, NowTV, TimVision)	Si	Solo	Pomeriggio (13:00-18:00)	Si, solo a pranzo	Spesso	Spesso	Qualche Volta	6	4	3	4	29	16	10	9	64	MODERATE_BW	29	14	19	62	50	21	74
131	19	Female	1.63	72	27.0993	Single	Diploma	13	Studente/ssa	1	Genitori	1	3	15	0	Pomeriggio (13:00-18:00), Sera (18:00-00:00)	Si, in entrambi i pasti	Si	Si	4	Spesso	Spesso	Thriller, Avventura, Fantascientifiche, Crime, Serie Animate	La casa di carta Una serie di sfortunati eventi Rick & Morty	Piattaforme On-Demand (Sky Online, Infinity, Netflix, Mediaset Premium, NowTV, TimVision)	Si	Solo	Pomeriggio (13:00-18:00), Sera (18:00-00:00)	Si, solo a pranzo	Sempre	Sempre	Quasi Mai	2	3	5	6	30	20	9	5	64	MODERATE_BW	25	16	22	63	71	36	67
132	19	Female	1.6	57	22.2656	Single	Diploma	13	Studente/ssa	1	Genitori	2	7	10	1	Pomeriggio (13:00-18:00), Sera (18:00-00:00)	Si, in entrambi i pasti	No	Si	4 ore	Raramente	Raramente	Avventura, Commedia, Fantascientifiche, Crime	Once upon a time, new girl, Jane the virgin	Piattaforme On-Demand (Sky Online, Infinity, Netflix, Mediaset Premium, NowTV, TimVision), Streaming on-line, DVD	Si	Solo	Pomeriggio (13:00-18:00), Sera (18:00-00:00)	No	Sempre	Sempre	Sempre	5	4	5	6	31	15	9	11	66	MODERATE_BW	11	16	18	45	54	12	79
133	19	Female	1.7	60	20.7612	Single	Diploma	13	Studente/ssa	1	Genitori	1	5	1	0.5	Sera (18:00-00:00), Notte (00:00-6:00)	Si, in entrambi i pasti	No	Si	8 ore	Mai	Raramente	Thriller, Drama, Avventura, Commedia, Fantascientifiche	Supernatural The flash La casa de papel Prison break Teen wolf	Piattaforme On-Demand (Sky Online, Infinity, Netflix, Mediaset Premium, NowTV, TimVision)	Si	Solo	Pomeriggio (13:00-18:00), Sera (18:00-00:00), Notte (00:00-6:00)	No	Sempre	Sempre	Sempre	7	10+	10 ore	7	33	18	12	3	66	MODERATE_BW	19	16	14	49	52	8	17
134	19	Female	1.6	65	25.3906	Single	Diploma	13	Studente/ssa	1	Genitori	2	20	2	5	Sera (18:00-00:00), Notte (00:00-6:00)	Si, in entrambi i pasti	Si	Si	4/5 ore	Raramente	Raramente	Thriller, Avventura, Fantascientifiche, Crime	Supernatural Once upon a time The flash	Piattaforme On-Demand (Sky Online, Infinity, Netflix, Mediaset Premium, NowTV, TimVision), Streaming on-line	Si	Solo	Sera (18:00-00:00), Notte (00:00-6:00)	Si, in entrambi i pasti	Sempre	Sempre	Sempre	7	8	4/5	4	31	16	11	9	67	MODERATE_BW	14	9	24	47	37	10	13
135	19	Female	1.75	60	19.5918	Single	Diploma	13	Studente/ssa	0	Genitori	1	5	10	2	Pomeriggio (13:00-18:00)	Si, in entrambi i pasti	Si	Si	2:30/3 ore	Raramente	Qualche volta	Drama, Avventura, Commedia, Musical	Riverdale,Pretty Little Liars,Soy luna,Cherry season,Cilek kokusu,Erkenci kus	Televisore, Streaming on-line	No	Con la famiglia	Pomeriggio (13:00-18:00), Sera (18:00-00:00)	No	Qualche Volta	Spesso	Qualche Volta	4	3	3 ore	3	33	14	11	10	68	MODERATE_BW	22	16	25	63	52	30	75
136	20	Female	1.7	55	19.0311	Fidanzato/a	Diploma	14	Disoccupato/a	0	Genitori	2	0	1	0	Sera (18:00-00:00)	No	No	Si	2 ore	Qualche volta	Qualche volta	Drama, Avventura, Commedia, Fantascientifiche, Horror, Crime	Games of Thrones, Dark, Hill House	Piattaforme On-Demand (Sky Online, Infinity, Netflix, Mediaset Premium, NowTV, TimVision), Streaming on-line	Si	Solo	Mattina (6:00-13:00), Pomeriggio (13:00-18:00), Sera (18:00-00:00), Notte (00:00-6:00)	No	Spesso	Sempre	Spesso	5	3	3	4	26	10	9	7	52	MODERATE_BW	25	16	19	60	56	16	55
137	20	Female	1.65	58	21.3039	Single	Diploma	13	Studente/ssa	0	Appartamento Condiviso	0	1	20	0	Sera (18:00-00:00)	No	No	Si	4	Qualche volta	Qualche volta	Drama, Avventura, Commedia, Medical Drama, Crime	Supernatural, once upon a time, house	Piattaforme On-Demand (Sky Online, Infinity, Netflix, Mediaset Premium, NowTV, TimVision), Streaming on-line	Si	Solo	Pomeriggio (13:00-18:00), Sera (18:00-00:00)	Si, in entrambi i pasti	Sempre	Sempre	Spesso	7	4	4	3	26	7	8	11	52	MODERATE_BW	25	21	24	70	62	16	56
138	20	Female	1.72	80	27.0416	Single	Diploma	13	Studente/ssa	1	Genitori	1	2	2	1	Sera (18:00-00:00)	No	Si	Si	2	Mai	Raramente	Drama, Avventura, Documentaristiche, Medical Drama	Greys Anatomy, the 100, Riverdale	Streaming on-line	No	Solo	Pomeriggio (13:00-18:00), Sera (18:00-00:00)	Si, in entrambi i pasti	Spesso	Spesso	Spesso	4	5	5	3	32	10	9	2	53	MODERATE_BW	31	21	20	72	70	11	72
139	20	Female	1.77	81	25.8546	Fidanzato/a	Licenza Media	14	Studente/ssa	0	Genitori	6	4	20	3	Pomeriggio (13:00-18:00), Sera (18:00-00:00)	Si, in entrambi i pasti	No	Si	5/6 ore	Spesso	Spesso	Thriller, Drama, Avventura, Commedia, Biografiche, Documentaristiche, Fantascientifiche, Medical Drama, Crime	How I met your mother, Game of Thrones e Lost	Piattaforme On-Demand (Sky Online, Infinity, Netflix, Mediaset Premium, NowTV, TimVision)	Si	Solo	Pomeriggio (13:00-18:00), Sera (18:00-00:00)	Si, in entrambi i pasti	Sempre	Sempre	Sempre	7	6	6 ore	7	22	13	12	6	53	MODERATE_BW	30	18	24	72	77	45	93
140	20	Female	1.6	57	22.2656	Single	Diploma	13	Studente/ssa	1	Genitori	1	1	4.5	0	Pomeriggio (13:00-18:00)	No	No	Si	Da 0 a anche 10 ore dipende dagli impegni	Qualche volta	Qualche volta	Thriller, Drama, Avventura, Documentaristiche, Medical Drama, Crime	The americans, criminal mind, stranger things, mr robot, narcos ECC.ecc.	Streaming on-line	No	Solo	Pomeriggio (13:00-18:00), Sera (18:00-00:00), Notte (00:00-6:00)	Si, solo a pranzo	Spesso	Sempre	Qualche Volta	3	6	5/6 ore	4	25	15	6	7	53	MODERATE_BW	16	19	14	49	59	20	47
141	20	Female	1.55	55	22.8928	Fidanzato/a	Laurea Triennale	13	Studente/ssa	1	Genitori	0	10	50	2	Sera (18:00-00:00), Notte (00:00-6:00)	Si, in entrambi i pasti	Si	Si	Moltissimo anche 8 ore	Qualche volta	Spesso	Thriller, Crime, Psicologiche	Shameless, Le regole del delitto perfetto, quantico	Streaming on-line	No	Solo	Sera (18:00-00:00), Notte (00:00-6:00)	Si, in entrambi i pasti	Sempre	Sempre	Mai	3	10+	10	3	30	14	6	4	54	MODERATE_BW	18	13	13	44	60	18	48
142	20	Female	1.72	75	25.3515	Fidanzato/a	Diploma	13	Studente/ssa	0	Genitori	3	5	3	0	Sera (18:00-00:00)	Si, solo a cena	No	Si	5	Mai	Raramente	Drama, Avventura, Commedia, Fantascientifiche, Musical	Shameless, RuPaul's Drag Race, The Office	Piattaforme On-Demand (Sky Online, Infinity, Netflix, Mediaset Premium, NowTV, TimVision), Streaming on-line	Si	Solo	Sera (18:00-00:00), Notte (00:00-6:00)	No	Sempre	Sempre	Mai	5	10+	13	5	21	19	11	3	54	MODERATE_BW	7	7	10	24	62	4	76
143	20	Female	1.6	75	29.2969	Fidanzato/a	Laurea Triennale	16	Studente/ssa	0	Genitori	3			1	Sera (18:00-00:00)	No	No	Si	2/3 orette	Qualche volta	Spesso	Drama, Commedia, Anime, Horror, Musical	Brooklyn Nine Nine, Scandal, My Hero Accademia	Piattaforme On-Demand (Sky Online, Infinity, Netflix, Mediaset Premium, NowTV, TimVision), Streaming on-line	Si	Solo	Pomeriggio (13:00-18:00), Sera (18:00-00:00)	No	Sempre	Sempre	Spesso	4	10+	7/8	4	27	13	9	7	56	MODERATE_BW	15	23	26	64	65	20	104
144	20	Female	1.7	50	17.301	Single	Licenza Media	8	Studente/ssa	0	Genitori	0	10	10	1	Sera (18:00-00:00)	Si, solo a cena	No	Si	4	Qualche volta	Raramente	Drama, Commedia	Gilmore gils, Friends, The 100	Piattaforme On-Demand (Sky Online, Infinity, Netflix, Mediaset Premium, NowTV, TimVision)	Si	Con la famiglia	Pomeriggio (13:00-18:00)	No	Sempre	Sempre	Quasi Mai	1	2	2	1	23	17	7	12	59	MODERATE_BW	12	22	16	50	74	47	106
145	20	Female	1.6	57	22.2656	Single	Laurea Triennale	16	Studente/ssa	0	Genitori	1		10	0	Sera (18:00-00:00)	No	No	Si	3	Qualche volta	Qualche volta	Drama, Commedia, Fantascientifiche, Medical Drama, Musical	How I met your mother, Gotham, Grey’s Anatomy, Glee, Shadowhunters, Game of Thrones	Piattaforme On-Demand (Sky Online, Infinity, Netflix, Mediaset Premium, NowTV, TimVision), Streaming on-line	Si	Solo	Sera (18:00-00:00)	No	Sempre	Spesso	Spesso	7	3	2	2	27	14	11	8	60	MODERATE_BW	15	14	21	50	48	9	60
146	20	Female	1.74	70	23.1206	Fidanzato/a	Diploma	13	Studente/ssa	1	Genitori	5	20	20	1	Sera (18:00-00:00), Notte (00:00-6:00)	Si, solo a cena	No	Si	5	Qualche volta	Qualche volta	Drama, Commedia, Anime, Biografiche, Fantascientifiche, Serie Animate	Doctor Who, Game of Thrones, Lucifer	Televisore, Piattaforme On-Demand (Sky Online, Infinity, Netflix, Mediaset Premium, NowTV, TimVision), Streaming on-line	Si	Con il partner	Sera (18:00-00:00), Notte (00:00-6:00)	No	Spesso	Spesso	Spesso	3	10+	10	2	25	16	12	8	61	MODERATE_BW	12	8	15	35	55	15	42
147	20	Female	1.7	80	27.6817	Single	Diploma	13	Studente/ssa	0	Genitori	0	15	24	1	Pomeriggio (13:00-18:00), Sera (18:00-00:00), Notte (00:00-6:00)	Si, in entrambi i pasti	No	Si	5/10 ore al giorno, dipende dal tempo che ho a disposizione	Qualche volta	Spesso	Thriller, Drama, Avventura, Commedia, Crime, Western, Fantasy	Supernatural, Lucifer, Dynasty, Shadowhunters, Flash, Famous in love, Riverdale e sto rifacendo il rewatch di altre serie	Piattaforme On-Demand (Sky Online, Infinity, Netflix, Mediaset Premium, NowTV, TimVision), Streaming on-line	Si	Solo	Mattina (6:00-13:00), Pomeriggio (13:00-18:00), Sera (18:00-00:00), Notte (00:00-6:00)	Si, in entrambi i pasti	Sempre	Sempre	Mai	7	10+	168 ore	6	31	12	9	9	61	MODERATE_BW	26	25	32	83	62	14	42
148	20	Female	1.58	70	28.0404	Single	Diploma	13	Disoccupato/a	0	Genitori	2	4	4	5	Mattina (6:00-13:00)	Si, in entrambi i pasti	Si	Si	3/4 ore	Qualche volta	Mai	Drama, Commedia, Fantascientifiche, Medical Drama, Musical	Grey's Anatomy, New Girl, Game of Thrones	Piattaforme On-Demand (Sky Online, Infinity, Netflix, Mediaset Premium, NowTV, TimVision)	Si	Solo	Sera (18:00-00:00), Notte (00:00-6:00)	No	Sempre	Sempre	Quasi Mai	5	7	5 ore	7	26	15	12	11	64	MODERATE_BW	27	17	26	70	59	21	60
149	20	Female	1.6	50	19.5312	Single	Diploma	13	Studente/ssa	1	Appartamento Condiviso	1	8	8	1	Pomeriggio (13:00-18:00), Sera (18:00-00:00)	Si, solo a pranzo	Si	Si	3	Qualche volta	Qualche volta	Drama, Commedia, Anime, Fantascientifiche, Medical Drama, Crime	Big bang theory, chicago med, grey's anatomy, suits, law & order, Violet Evergarden, teen Wolf, pretty little liars, breaking bad, kakegurui, la casa de papel, Tokyo Ghoul, friends, una mamma per amica, how I met your mum.	Piattaforme On-Demand (Sky Online, Infinity, Netflix, Mediaset Premium, NowTV, TimVision), Streaming on-line	Si	Solo	Pomeriggio (13:00-18:00), Sera (18:00-00:00)	Si, solo a pranzo	Sempre	Sempre	Mai	3	6	4	3	31	18	8	8	65	MODERATE_BW	33	21	29	83	71	58	22
150	20	Female	1.56	98	40.2696	Single	Diploma	13	Disoccupato/a	1	Genitori	0	10	12	1	Sera (18:00-00:00)	Si, in entrambi i pasti	No	Si	15 ore	Qualche volta	Qualche volta	Avventura, Fantascientifiche, Crime	Game of thrones,vikings,the crown	Piattaforme On-Demand (Sky Online, Infinity, Netflix, Mediaset Premium, NowTV, TimVision)	Si	Con la famiglia	Sera (18:00-00:00), Notte (00:00-6:00)	No	Sempre	Sempre	Sempre	7	10+	10/12	4	33	18	7	10	68	MODERATE_BW	25	18	26	69	62	29	59
151	21	Female	1.56	50	20.5457	Fidanzato/a	Diploma	16	Studente/ssa	0	Genitori	2	40	30	4	Sera (18:00-00:00)	Si, solo a cena	Si	Si	4 ore	Spesso	Spesso	Drama, Avventura, Commedia, Anime, Fantascientifiche, Horror, Medical Drama	Big bang theory Grey’s Anatomy Il Trono di Spade The Royals Shameless Young Sheldon New Girl American Horror Story The Crown	Televisore, Piattaforme On-Demand (Sky Online, Infinity, Netflix, Mediaset Premium, NowTV, TimVision), Streaming on-line	Si	Solo	Sera (18:00-00:00)	Si, solo a cena	Sempre	Sempre	Spesso	7	8	4 ore	5	26	12	10	6	54	MODERATE_BW	17	15	22	54	59	20	86
152	21	Female	1.65	67	24.6097	Single	Licenza Media	8	Studente/ssa	0	Genitori	1	10	5	2	Pomeriggio (13:00-18:00), Sera (18:00-00:00)	Si, in entrambi i pasti	No	Si	2	Spesso	Spesso	Avventura, Fantascientifiche, Horror	Teen Wolf, Merlin, Bones	Streaming on-line	No	Solo	Pomeriggio (13:00-18:00), Sera (18:00-00:00)	No	Spesso	Qualche Volta	Qualche Volta	3	4	3	3	26	10	9	9	54	MODERATE_BW	34	16	23	73	63	24	89
153	21	Female	1.65	75	27.5482	Fidanzato/a	Diploma	13	Disoccupato/a	0	Genitori	2	20	7	1	Sera (18:00-00:00), Notte (00:00-6:00)	Si, solo a cena	No	Si	6-7	Spesso	Spesso	Thriller, Drama, Avventura, Commedia, Fantascientifiche, Horror, Crime, Musical	Doctor who , criminal minds , modern family	Piattaforme On-Demand (Sky Online, Infinity, Netflix, Mediaset Premium, NowTV, TimVision)	Si	Solo	Sera (18:00-00:00), Notte (00:00-6:00)	Si, solo a cena	Sempre	Sempre	Spesso	6	6	5-6	6	28	15	11	4	58	MODERATE_BW	23	16	22	61	65	15	78
154	21	Female	1.75	75	24.4898	Single	Laurea Triennale	16	Studente/ssa	1	Solo	2	4	20	0.5	Sera (18:00-00:00)	No	Si	Si	2-3 ore	Raramente	Raramente	Avventura, Commedia, Anime, Fantascientifiche, Horror, Medical Drama, Crime, Musical, Serie Animate	Death Note, Grey's Anatomy, My Hero Academia, The Seven Deadly Sins	Piattaforme On-Demand (Sky Online, Infinity, Netflix, Mediaset Premium, NowTV, TimVision), Streaming on-line	Si	Con amici	Sera (18:00-00:00), Notte (00:00-6:00)	Si, in entrambi i pasti	Sempre	Sempre	Sempre	5	10+	6-8 ore	4	31	15	8	7	61	MODERATE_BW	32	21	24	77	65	21	76
155	21	Female	1.68	70	24.8016	Single	Diploma	13	Studente/ssa	1	Genitori	1	5	10	1.5	Sera (18:00-00:00)	Si, in entrambi i pasti	No	Si	2 ore	Raramente	Raramente	Thriller, Drama, Avventura, Commedia, Biografiche, Fantascientifiche, Crime, Musical	Izombie, once upon a time, suits, riverdale e tante altre	Piattaforme On-Demand (Sky Online, Infinity, Netflix, Mediaset Premium, NowTV, TimVision), Streaming on-line	Si	Solo	Sera (18:00-00:00)	Si, in entrambi i pasti	Spesso	Quasi Mai	Mai	2	10+	9	3	34	10	12	6	62	MODERATE_BW	14	10	16	40	45	13	59
156	21	Female	1.65	67	24.6097	Single	Diploma	13	Studente/ssa	1	Genitori	1	2	30	0	Sera (18:00-00:00), Notte (00:00-6:00)	Si, solo a cena	No	Si	6 ore	Raramente	Raramente	Thriller, Avventura, Horror, Crime	Shadowhuntes, teen wolf, criminal minds	Piattaforme On-Demand (Sky Online, Infinity, Netflix, Mediaset Premium, NowTV, TimVision), Streaming on-line	Si	Solo	Sera (18:00-00:00), Notte (00:00-6:00)	Si, solo a pranzo	Sempre	Sempre	Spesso	4	7	8	3	31	14	9	11	65	MODERATE_BW	28	18	24	70	50	7	35
157	21	Female	1.65	69	25.3444	Single	Diploma	13	Lavoro Fisico	0	Genitori	2	27	100	1	Pomeriggio (13:00-18:00), Notte (00:00-6:00)	Si, in entrambi i pasti	No	Si	7	Spesso	Spesso	Thriller, Avventura, Anime, Fantascientifiche, Horror, Medical Drama, Crime, Serie Animate	Doctor who, the walking dead, teen wolf	Streaming on-line	No	Solo	Pomeriggio (13:00-18:00), Notte (00:00-6:00)	Si, in entrambi i pasti	Sempre	Sempre	Mai	4	10+	6	3	30	15	11	10	66	MODERATE_BW	19	14	27	60	53	15	76
158	21	Female	1.62	51	19.433	Fidanzato/a	Diploma	13	Studente/ssa	1	Genitori	2	6	1	0.15	Pomeriggio (13:00-18:00)	No	No	Si	3 ore	Raramente	Mai	Thriller, Drama, Avventura, Commedia, Biografiche, Documentaristiche, Fantascientifiche, Medical Drama, Crime	Dinasty , Designated survival, criminal minds	Piattaforme On-Demand (Sky Online, Infinity, Netflix, Mediaset Premium, NowTV, TimVision), Streaming on-line	Si	Solo	Sera (18:00-00:00), Notte (00:00-6:00)	No	Sempre	Sempre	Mai	5	10+	7 ore	2	28	19	8	11	66	MODERATE_BW	25	17	23	65	69	33	98
159	21	Female	1.65	50	18.3655	Fidanzato/a	Diploma	15	Studente/ssa	1	Genitori	3	7	20	2	Pomeriggio (13:00-18:00), Sera (18:00-00:00), Notte (00:00-6:00)	Si, in entrambi i pasti	No	Si	5 ore	Sempre	Spesso	Thriller, Drama, Avventura, Commedia, Fantascientifiche, Horror, Medical Drama	Tutte	Piattaforme On-Demand (Sky Online, Infinity, Netflix, Mediaset Premium, NowTV, TimVision), Streaming on-line	Si	Solo	Mattina (6:00-13:00), Pomeriggio (13:00-18:00), Sera (18:00-00:00), Notte (00:00-6:00)	No	Sempre	Sempre	Mai	7	7	8 ore	7	30	20	12	5	67	MODERATE_BW	7	5	12	24	38	8	16
160	21	Female	1.68	64	22.6757	Single	Diploma	13	Studente/ssa	0	Genitori	1	0	7	0	Pomeriggio (13:00-18:00)	No	No	Si	4ore	Raramente	Raramente	Thriller, Crime	Il trono di spade, the oc, empire	Piattaforme On-Demand (Sky Online, Infinity, Netflix, Mediaset Premium, NowTV, TimVision)	Si	Solo	Pomeriggio (13:00-18:00), Notte (00:00-6:00)	No	Sempre	Sempre	Sempre	6	7	8	4	34	16	7	10	67	MODERATE_BW	24	18	25	67	52	27	42
161	22	Female	1.75	80	26.1224	Single	Diploma	13	Studente/ssa	0	Appartamento Condiviso	1	4	10	2	Sera (18:00-00:00), Notte (00:00-6:00)	Si, in entrambi i pasti	No	Si	4	Qualche volta	Qualche volta	Thriller, Drama, Commedia, Medical Drama, Crime	Peaky Blinders, the good wife, dexter	Piattaforme On-Demand (Sky Online, Infinity, Netflix, Mediaset Premium, NowTV, TimVision), Streaming on-line	Si	Solo	Sera (18:00-00:00), Notte (00:00-6:00)	Si, in entrambi i pasti	Qualche Volta	Qualche Volta	Spesso	2	3	3	2	22	15	9	8	54	MODERATE_BW	21	15	24	60	51	9	41
162	22	Female	1.75	60	19.5918	Single	Diploma	12	Studente/ssa	1	Genitori	1	12	16	3	Pomeriggio (13:00-18:00), Sera (18:00-00:00), Notte (00:00-6:00)	Si, in entrambi i pasti	No	Si	6	Spesso	Spesso	Drama, Avventura, Commedia, Medical Drama, Crime, Serie Animate	Grey’s anatomy. Supernatural. Game of thrones. Bitten. The tudors. Crown. Reign. Teen wolf. Scrubs. Black sails. Spartacus.	Televisore, Piattaforme On-Demand (Sky Online, Infinity, Netflix, Mediaset Premium, NowTV, TimVision), Streaming on-line	Si	Solo	Pomeriggio (13:00-18:00), Sera (18:00-00:00), Notte (00:00-6:00)	Si, in entrambi i pasti	Sempre	Sempre	Sempre	7	10+	12	6	25	17	11	1	54	MODERATE_BW	15	14	19	48	65	23	15
163	22	Female	1.75	75	24.4898	Single	Diploma	13	Studente/ssa	1	Genitori	1	7	3	3	Sera (18:00-00:00)	Si, in entrambi i pasti	No	Si	3	Qualche volta	Mai	Thriller, Commedia, Medical Drama	Grey's anatomy, game of Thrones, this is us, how I met tour mother, big bang theory	Streaming on-line	No	Solo	Pomeriggio (13:00-18:00), Sera (18:00-00:00)	No	Qualche Volta	Sempre	Quasi Mai	2	3	3	2	22	11	9	12	54	MODERATE_BW	15	14	17	46	60	17	87
164	22	Female	1.59	58	22.9421	Single	Diploma	13	Studente/ssa	0	Appartamento Condiviso	1	10	20	2	Mattina (6:00-13:00), Sera (18:00-00:00)	Si, in entrambi i pasti	No	Si	1 o 2 ore circa	Qualche volta	Qualche volta	Drama, Commedia, Fantascientifiche, Medical Drama, Crime, Musical	How to get away with a Murder Scandal Arrow The Flash Legend offline Tomorrowland Supergirl Brooklyn Nine Nine American Horror Story	Streaming on-line	No	Solo	Sera (18:00-00:00)	Si, solo a cena	Sempre	Spesso	Qualche Volta	3	9	8/9 ore	2	29	14	9	5	57	MODERATE_BW	14	18	14	46	46	14	49
165	22	Female	1.6	63	24.6094	Single	Laurea Triennale	16	Studente/ssa	1	Genitori	3	2	2	1	Sera (18:00-00:00)	Si, solo a cena	No	Si	3 ore	Qualche volta	Qualche volta	Drama, Avventura, Fantascientifiche, Crime	The blacklist Supernatural Agents of shield	Streaming on-line	No	Solo	Pomeriggio (13:00-18:00), Sera (18:00-00:00)	Si, solo a pranzo	Spesso	Spesso	Spesso	3	4	5 ore	1	25	14	9	10	58	MODERATE_BW	9	11	27	47	53	13	30
166	22	Female	1.72	70	23.6614	Single	Diploma	20	Studente/ssa	1	Genitori	1			1.5	Mattina (6:00-13:00), Sera (18:00-00:00)	Si, in entrambi i pasti	No	Si	8-9 h	Qualche volta	Spesso	Drama, Avventura, Commedia, Biografiche, Musical, Serie Animate	Penny Dreadful, Strangers, Argon	Piattaforme On-Demand (Sky Online, Infinity, Netflix, Mediaset Premium, NowTV, TimVision), Streaming on-line	Si	Solo	Mattina (6:00-13:00), Pomeriggio (13:00-18:00), Sera (18:00-00:00)	No	Spesso	Spesso	Qualche Volta	7	8	10 h	4	27	15	8	8	58	MODERATE_BW	13	16	21	50	66	21	88
167	23	Female	1.69	70	24.5089	Single	Diploma	13	Studente/ssa	1	Appartamento Condiviso	0	10	14	2	Pomeriggio (13:00-18:00), Sera (18:00-00:00)	Si, in entrambi i pasti	No	Si	4	Raramente	Qualche volta	Thriller, Drama, Fantascientifiche, Horror, Crime, Serie Animate	Game of Thrones, How to get away with murder, Griffin	Piattaforme On-Demand (Sky Online, Infinity, Netflix, Mediaset Premium, NowTV, TimVision), Streaming on-line	Si	Solo	Notte (00:00-6:00)	Si, solo a pranzo	Spesso	Qualche Volta	Mai	1	4	4	2	25	15	8	4	52	MODERATE_BW	13	19	14	46	66	21	35
168	23	Female	1.67	72	25.8166	Single	Diploma	14	Lavoro Fisico	1	Genitori	0			0	Notte (00:00-6:00)	No	No	Si	5-6 ore	Raramente	Qualche volta	Drama, Commedia, Anime, Serie Animate, Romantiche, fantasy	Il trono di spade, chiamatemi Anna, Black	Streaming on-line, DVD	No	Solo	Notte (00:00-6:00)	No	Sempre	Sempre	Mai	5	3	3	5	26	14	9	4	53	MODERATE_BW	11	5	16	32	71	20	53
169	23	Female	1.58	78	31.245	Single	Diploma	14	Lavoro Fisico	1	Genitori	0	20	13	5	Sera (18:00-00:00)	Si, in entrambi i pasti	Si	Si	Periodicamente parlando tra le 15/20	Raramente	Raramente	Thriller, Anime, Fantascientifiche, Horror, Crime	Sense8 Hannibal Teen wolf	Streaming on-line	Si	Solo	Sera (18:00-00:00), Notte (00:00-6:00)	Si, in entrambi i pasti	Sempre	Sempre	Qualche Volta	2	2	6	1	24	11	4	14	53	MODERATE_BW	33	22	23	78	74	39	86
170	23	Female	1.7	65	22.4913	Fidanzato/a	Laurea Triennale	17	Studente/ssa	1	Appartamento Condiviso	0	2	10	1	Pomeriggio (13:00-18:00), Notte (00:00-6:00)	Si, in entrambi i pasti	No	Si	3	Spesso	Spesso	Thriller, Drama, Avventura, Commedia, Fantascientifiche, Medical Drama	Game of thrones, Gray's Anatomy, the oc	Piattaforme On-Demand (Sky Online, Infinity, Netflix, Mediaset Premium, NowTV, TimVision), Streaming on-line	No	Solo	Notte (00:00-6:00)	Si, in entrambi i pasti	Qualche Volta	Mai	Mai	1	2	3	1	28	15	5	6	54	MODERATE_BW	12	5	13	30	64	26	40
171	23	Female	1.61	78	30.0914	Single	Laurea Triennale	16	Lavoro Intellettuale	0	Solo	0	7	10	1	Pomeriggio (13:00-18:00), Sera (18:00-00:00)	Si, in entrambi i pasti	Si	Si	Tanto	Qualche volta	Qualche volta	Thriller, Drama, Avventura, Commedia, Anime, Biografiche, Fantascientifiche, Horror, Medical Drama, Crime, Musical, Western	Brookling 99, Reigh, Animal Kingdom	Piattaforme On-Demand (Sky Online, Infinity, Netflix, Mediaset Premium, NowTV, TimVision), Streaming on-line	Si	Solo	Pomeriggio (13:00-18:00), Sera (18:00-00:00), Notte (00:00-6:00)	Si, in entrambi i pasti	Spesso	Spesso	Sempre	6	10+	4	4	25	17	8	8	58	MODERATE_BW	28	18	25	71	64	38	102
172	23	Female	1.6	65	25.3906	Single	Diploma	13	Disoccupato/a	1	Genitori	0	7	10	0	Mattina (6:00-13:00)	Si, solo a pranzo	No	Si	5/6 ore	Qualche volta	Qualche volta	Thriller, Drama, Anime, Biografiche, Documentaristiche, Fantascientifiche, Crime, Musical, Serie Animate	Boardwalk Empire, the oa, spartacus	Streaming on-line	No	Solo	Mattina (6:00-13:00), Pomeriggio (13:00-18:00), Sera (18:00-00:00)	Si, in entrambi i pasti	Spesso	Spesso	Quasi Mai	7	10+	7/8	2	34	14	9	9	66	MODERATE_BW	30	11	19	60	71	37	83
173	24	Female	1.46	40	18.7652	Fidanzato/a	Diploma	13	Studente/ssa	0	Appartamento Condiviso	1	5	1	2	Pomeriggio (13:00-18:00), Sera (18:00-00:00)	Si, solo a cena	Si	Si	2 ORE	Qualche volta	Qualche volta	Thriller, Drama, Biografiche, Medical Drama, Crime, Serie Animate	Grey's Anatomy, Queer as Folk, The L Word	Streaming on-line	No	Solo	Pomeriggio (13:00-18:00), Sera (18:00-00:00)	Si, solo a cena	Spesso	Spesso	Qualche Volta	4	3	3	2	28	14	7	4	53	MODERATE_BW	23	18	13	54	68	10	90
174	24	Female	1.65	65	23.8751	Fidanzato/a	Laurea Triennale	16	Lavoro Fisico	0	Genitori	0	15	8	2	Mattina (6:00-13:00), Pomeriggio (13:00-18:00)	Si, solo a cena	No	Si	4	Raramente	Raramente	Thriller, Drama, Avventura, Commedia, Biografiche, Documentaristiche, Fantascientifiche, Horror, Medical Drama, Crime, Musical, Serie Animate	The Flash, Big Bang Theory, Scrubs, American Horror Story	Piattaforme On-Demand (Sky Online, Infinity, Netflix, Mediaset Premium, NowTV, TimVision), Streaming on-line	No	Solo	Mattina (6:00-13:00), Pomeriggio (13:00-18:00)	Si, in entrambi i pasti	Spesso	Sempre	Sempre	5	4	6	3	35	12	3	7	57	MODERATE_BW	22	11	24	57	66	43	103
175	24	Female	1.7	115	39.7924	Single	Diploma	15	Studente/ssa	1	Genitori	2	10	30	2	Sera (18:00-00:00)	Si, in entrambi i pasti	No	Si	6/7 ore	Qualche volta	Qualche volta	Thriller, Drama, Avventura, Commedia, Fantascientifiche, Horror, Medical Drama, Crime	Game of thrones Criminal minds Friends I misteri di murdoch X files Dontown abbey	Streaming on-line	No	Solo	Mattina (6:00-13:00), Pomeriggio (13:00-18:00), Sera (18:00-00:00), Notte (00:00-6:00)	No	Sempre	Sempre	Spesso	7	6	Circa 6h	7	25	14	10	8	57	MODERATE_BW	25	22	22	69	67	23	78
176	24	Female	1.7	72	24.9135	Fidanzato/a	Laurea Triennale	15	Studente/ssa	0	Nonni	2	80	90	4	Pomeriggio (13:00-18:00), Sera (18:00-00:00)	Si, in entrambi i pasti	No	Si	7	Mai	Qualche volta	Drama, Avventura, Commedia, Documentaristiche, Fantascientifiche, Medical Drama, Crime, Serie Animate	Once upon a time, got,una serie di sfortunati eventi,stranger thinks, originals,shadow hunter, bbt, modern family	Piattaforme On-Demand (Sky Online, Infinity, Netflix, Mediaset Premium, NowTV, TimVision), Streaming on-line	Si	Solo	Notte (00:00-6:00)	No	Spesso	Spesso	Qualche Volta	7	4	4	4	22	15	8	13	58	MODERATE_BW	31	23	24	78	61	33	51
177	24	Female	1.64	80	29.7442	Fidanzato/a	Diploma	13	Studente/ssa	0	Appartamento Condiviso	2	5	10	2	Pomeriggio (13:00-18:00)	Si, in entrambi i pasti	Si	Si	4	Sempre	Spesso	Commedia, Medical Drama, Crime, Musical	Grey' s anatomy the Resident dinasty	Televisore, Piattaforme On-Demand (Sky Online, Infinity, Netflix, Mediaset Premium, NowTV, TimVision), Streaming on-line	Si	Solo	Pomeriggio (13:00-18:00), Sera (18:00-00:00), Notte (00:00-6:00)	Si, in entrambi i pasti	Mai	Mai	Spesso	7	8	7	5	29	10	11	12	62	MODERATE_BW	8	8	12	28	52	15	65
178	25	Female	1.53	60	25.6312	Single	Diploma	13	Studente/ssa	1	Appartamento Condiviso	3	2		3	Sera (18:00-00:00), Notte (00:00-6:00)	Si, solo a cena	Si	Si	5 ore	Qualche volta	Qualche volta	Commedia, Anime, Fantascientifiche, Horror, Medical Drama, Crime, Serie Animate	Grey's anatomy The big bang theory Young sheldon Bones	Streaming on-line	No	Solo	Sera (18:00-00:00), Notte (00:00-6:00)	Si, solo a pranzo	Sempre	Sempre	Sempre	6	4	4	6	21	16	9	6	52	MODERATE_BW	12	21	20	53	59	20	101
179	25	Female	1.65	48	17.6309	Fidanzato/a	Diploma	13	Studente/ssa	0	Genitori	2	6	2	2	Pomeriggio (13:00-18:00), Sera (18:00-00:00)	Si, in entrambi i pasti	No	Si	3 ore	Qualche volta	Raramente	Thriller, Drama, Horror, Medical Drama, Crime	The flash, Supergirl, Siren, Pretty little liars	Streaming on-line	No	Solo	Mattina (6:00-13:00), Notte (00:00-6:00)	No	Sempre	Sempre	Qualche Volta	1	6	2 ore e mezza	1	26	17	8	1	52	MODERATE_BW	17	13	26	56	66	28	107
180	25	Female	1.67	70	25.0995	Single	Laurea Magistrale	18	Disoccupato/a	1	Appartamento Condiviso	3	1	60	1	Mattina (6:00-13:00)	Si, solo a pranzo	No	Si	2	Raramente	Raramente	Drama, Commedia, Medical Drama	Commedie	Streaming on-line	No	Solo	Sera (18:00-00:00)	Si, solo a pranzo	Mai	Sempre	Spesso	2	10+	10 ore	2	28	11	8	6	53	MODERATE_BW	12	14	26	52	52	5	61
181	25	Female	1.64	53	19.7055	Single	Laurea Magistrale	19	Studente/ssa	1	Appartamento Condiviso	2	8	3	2	Pomeriggio (13:00-18:00), Sera (18:00-00:00)	Si, in entrambi i pasti	No	Si	5	Spesso	Spesso	Thriller, Drama, Avventura, Commedia, Fantascientifiche, Medical Drama, Crime	Grey’s Anatomy, Lucifer, how to get away with murder	Piattaforme On-Demand (Sky Online, Infinity, Netflix, Mediaset Premium, NowTV, TimVision), Streaming on-line	Si	Solo	Pomeriggio (13:00-18:00), Sera (18:00-00:00)	Si, in entrambi i pasti	Sempre	Sempre	Quasi Mai	6	7	8	3	21	15	9	8	53	MODERATE_BW	26	17	21	64	54	18	45
182	26	Female	1.65	70	25.7117	Single	Laurea Triennale	20	Studente/ssa	0	Genitori	2	15	10	3	Pomeriggio (13:00-18:00), Sera (18:00-00:00), Notte (00:00-6:00)	Si, in entrambi i pasti	No	Si	3 o 4	Qualche volta	Spesso	Drama, Avventura, Commedia, Fantascientifiche, Medical Drama	The walking dead, Friends, Grey's anatomy	Televisore, Piattaforme On-Demand (Sky Online, Infinity, Netflix, Mediaset Premium, NowTV, TimVision)	Si	Solo	Pomeriggio (13:00-18:00), Notte (00:00-6:00)	No	Sempre	Sempre	Quasi Mai	7	5	5 6	7	27	11	9	7	54	MODERATE_BW	15	18	20	53	59	11	84
183	27	Female	1.65	55	20.202	Single	Laurea Magistrale	18	Lavoro Intellettuale	0	Appartamento Condiviso	1	10	65	0	Sera (18:00-00:00)	No	No	Si	4-5 ore	Raramente	Raramente	Drama, Avventura, Biografiche, Musical	Game of Thrones, Mr Robot, Vikings. Tutte	Piattaforme On-Demand (Sky Online, Infinity, Netflix, Mediaset Premium, NowTV, TimVision), Streaming on-line	Si	Solo	Sera (18:00-00:00), Notte (00:00-6:00)	Si, solo a cena	Spesso	Quasi Mai	Spesso	4	2	2	2	23	13	11	5	52	MODERATE_BW	14	18	19	51	41	5	82
184	27	Female	1.76	89	28.7319	Single	Diploma	13	Lavoro Intellettuale	0	Genitori	0	10	0	0	Sera (18:00-00:00), Notte (00:00-6:00)	Si, solo a cena	Si	Si	4	Spesso	Spesso	Thriller, Drama, Horror	The originals, le regole del delitto perfetto, This is us	Streaming on-line	No	Solo	Sera (18:00-00:00), Notte (00:00-6:00)	Si, solo a cena	Sempre	Sempre	Qualche Volta	7	5	5	7	27	12	12	8	59	MODERATE_BW	12	16	23	51	38	7	23
185	27	Female	1.55	75	31.2175	Single	Licenza Media	8	Casalingo/a	1	Genitori	0	0	5	0	Notte (00:00-6:00)	Si, solo a cena	Si	Si	Tanto	Sempre	Sempre	Avventura, Commedia, Anime, Fantascientifiche, Serie Animate	Once upon a time, supernatural, prison break	Piattaforme On-Demand (Sky Online, Infinity, Netflix, Mediaset Premium, NowTV, TimVision)	Si	Solo	Notte (00:00-6:00)	No	Sempre	Sempre	Sempre	5	8	8	4	28	14	11	11	64	MODERATE_BW	22	16	32	70	66	36	113
186	31	Female	1.67	90	32.2708	Sposato/a o Convivente	Diploma	13	Lavoro Intellettuale	0	Coniuge (o fidanzato/a)	0	2	3	0	Sera (18:00-00:00)	Si, solo a cena	No	Si	3	Qualche volta	Qualche volta	Drama, Commedia, Horror, Medical Drama	Shameless - Grey's Anatomy - TWD	Streaming on-line	No	Con il partner	Sera (18:00-00:00)	Si, solo a cena	Sempre	Sempre	Mai	6	3	2/3	3	32	6	6	8	52	MODERATE_BW	8	7	14	29	53	4	91
187	18	Male	1.75	80	26.1224	Single	Diploma	13	Disoccupato/a	1	Genitori	1	6	4	1	Sera (18:00-00:00)	No	No	Si	5	Mai	Raramente	Thriller, Drama, Fantascientifiche, Horror, Crime	Agents of Shield, Criminal Minds, Timeless, Black Mirror	Televisore, Piattaforme On-Demand (Sky Online, Infinity, Netflix, Mediaset Premium, NowTV, TimVision), Streaming on-line	Si	Solo	Pomeriggio (13:00-18:00), Sera (18:00-00:00)	Si, in entrambi i pasti	Sempre	Sempre	Spesso	6	10+	10	4	26	8	8	12	54	MODERATE_BW	26	18	25	69	33	1	35
188	18	Male	1.75	80	26.1224	Single	Diploma	13	Disoccupato/a	1	Genitori	1	6	4	1	Sera (18:00-00:00)	No	No	Si	5	Mai	Raramente	Thriller, Drama, Fantascientifiche, Horror, Crime	Agents of Shield, Criminal Minds, Timeless, Black Mirror	Televisore, Piattaforme On-Demand (Sky Online, Infinity, Netflix, Mediaset Premium, NowTV, TimVision), Streaming on-line	Si	Solo	Pomeriggio (13:00-18:00), Sera (18:00-00:00)	Si, in entrambi i pasti	Sempre	Sempre	Spesso	6	10+	10	4	26	8	8	12	54	MODERATE_BW	26	18	25	69	33	1	35
189	18	Male	1.95	100	26.2985	Single	Licenza Media	14	Studente/ssa	1	Genitori	2	10	25	4	Sera (18:00-00:00)	No	Si	Si	5 ore	Raramente	Raramente	Drama, Avventura, Commedia, Documentaristiche, Fantascientifiche, Crime	Pretty little liars, Once Upon a Time, Modern Family, How i met your mother	Piattaforme On-Demand (Sky Online, Infinity, Netflix, Mediaset Premium, NowTV, TimVision)	Si	Con la famiglia	Pomeriggio (13:00-18:00), Sera (18:00-00:00)	Si, in entrambi i pasti	Sempre	Sempre	Sempre	7	5	4	7	32	12	8	5	57	MODERATE_BW	14	22	16	52	41	1	31
190	18	Male	1.95	100	26.2985	Single	Licenza Media	14	Studente/ssa	1	Genitori	2	10	25	4	Sera (18:00-00:00)	No	Si	Si	5 ore	Raramente	Raramente	Drama, Avventura, Commedia, Documentaristiche, Fantascientifiche, Crime	Pretty little liars, Once Upon a Time, Modern Family, How i met your mother	Piattaforme On-Demand (Sky Online, Infinity, Netflix, Mediaset Premium, NowTV, TimVision)	Si	Con la famiglia	Pomeriggio (13:00-18:00), Sera (18:00-00:00)	Si, in entrambi i pasti	Sempre	Sempre	Sempre	7	5	4	7	32	12	8	5	57	MODERATE_BW	14	22	16	52	41	1	31
191	18	Male	1.8	82	25.3086	Single	Licenza Media	8	Studente/ssa	0	Genitori	1	25	40	4	Pomeriggio (13:00-18:00), Sera (18:00-00:00), Notte (00:00-6:00)	Si, in entrambi i pasti	Si	Si	3	Sempre	Sempre	Drama, Fantascientifiche	Black Mirror, Stranger Things, Game of Thrones, Vikings	Piattaforme On-Demand (Sky Online, Infinity, Netflix, Mediaset Premium, NowTV, TimVision), Streaming on-line	Si	Solo	Sera (18:00-00:00)	Si, solo a cena	Sempre	Quasi Mai	Quasi Mai	3	3	3	5	25	14	11	9	59	MODERATE_BW	20	13	14	47	57	22	45
192	18	Male	1.8	82	25.3086	Single	Licenza Media	8	Studente/ssa	0	Genitori	1	25	40	4	Pomeriggio (13:00-18:00), Sera (18:00-00:00), Notte (00:00-6:00)	Si, in entrambi i pasti	Si	Si	3	Sempre	Sempre	Drama, Fantascientifiche	Black Mirror, Stranger Things, Game of Thrones, Vikings	Piattaforme On-Demand (Sky Online, Infinity, Netflix, Mediaset Premium, NowTV, TimVision), Streaming on-line	Si	Solo	Sera (18:00-00:00)	Si, solo a cena	Sempre	Quasi Mai	Quasi Mai	3	3	3	5	25	14	11	9	59	MODERATE_BW	20	13	14	47	57	22	45
193	18	Male	1.8	60	18.5185	Single	Licenza Media	8	Studente/ssa	0	Genitori	4	2	5	0	Notte (00:00-6:00)	Si, solo a cena	Si	Si	5 ore	Spesso	Spesso	Thriller, Drama, Avventura, Anime, Fantascientifiche, Horror, Medical Drama, Crime	Game of thronesss Grey's anatomy American horror Story How ti get away with Murder Pretty Little Liars Scream queens	Piattaforme On-Demand (Sky Online, Infinity, Netflix, Mediaset Premium, NowTV, TimVision), Streaming on-line	Si	Solo	Pomeriggio (13:00-18:00), Sera (18:00-00:00), Notte (00:00-6:00)	Si, solo a pranzo	Spesso	Spesso	Spesso	7	10+	7/8	7	27	18	6	9	60	MODERATE_BW	30	20	24	74	67	26	66
194	18	Male	1.72	72	24.3375	Single	Diploma	13	Studente/ssa	0	Genitori	0	0		3	Pomeriggio (13:00-18:00), Sera (18:00-00:00)	Si, in entrambi i pasti	No	Si	3/4 ore	Qualche volta	Raramente	Thriller, Drama, Avventura, Commedia, Anime, Fantascientifiche, Musical, Serie Animate	Teen wolf, the vampire diares, sense8, pretty little liars,etc....	Streaming on-line	Si	Solo	Pomeriggio (13:00-18:00), Sera (18:00-00:00), Notte (00:00-6:00)	No	Sempre	Sempre	Sempre	7	6	5	2	27	16	8	9	60	MODERATE_BW	23	21	23	67	61	34	85
195	18	Male	1.8	60	18.5185	Single	Licenza Media	8	Studente/ssa	0	Genitori	4	2	5	0	Notte (00:00-6:00)	Si, solo a cena	Si	Si	5 ore	Spesso	Spesso	Thriller, Drama, Avventura, Anime, Fantascientifiche, Horror, Medical Drama, Crime	Game of thronesss Grey's anatomy American horror Story How ti get away with Murder Pretty Little Liars Scream queens	Piattaforme On-Demand (Sky Online, Infinity, Netflix, Mediaset Premium, NowTV, TimVision), Streaming on-line	Si	Solo	Pomeriggio (13:00-18:00), Sera (18:00-00:00), Notte (00:00-6:00)	Si, solo a pranzo	Spesso	Spesso	Spesso	7	10+	7/8	7	27	18	6	9	60	MODERATE_BW	30	20	24	74	67	26	66
196	18	Male	1.72	72	24.3375	Single	Diploma	13	Studente/ssa	0	Genitori	0	0		3	Pomeriggio (13:00-18:00), Sera (18:00-00:00)	Si, in entrambi i pasti	No	Si	3/4 ore	Qualche volta	Raramente	Thriller, Drama, Avventura, Commedia, Anime, Fantascientifiche, Musical, Serie Animate	Teen wolf, the vampire diares, sense8, pretty little liars,etc....	Streaming on-line	Si	Solo	Pomeriggio (13:00-18:00), Sera (18:00-00:00), Notte (00:00-6:00)	No	Sempre	Sempre	Sempre	7	6	5	2	27	16	8	9	60	MODERATE_BW	23	21	23	67	61	34	85
197	18	Male	1.85	87.5	25.5661	Single	Diploma	13	Studente/ssa	0	Genitori	0	0		3	Pomeriggio (13:00-18:00)	Si, solo a cena	Si	Si	3/4 ore	Raramente	Raramente	Thriller, Drama, Avventura, Anime, Fantascientifiche, Horror, Medical Drama, Crime, Musical, Western, Serie Animate	Tante	Scarico gli episodi e li guardo alla Tv	No	Solo	Notte (00:00-6:00)	No	Sempre	Sempre	Quasi Mai	5	7	4/5 ore	5	33	13	10	8	64	MODERATE_BW	20	11	16	47	56	4	24
198	18	Male	1.82	148	44.6806	Single	Licenza Media	13	Studente/ssa	0	Genitori	0		15	0.5	Sera (18:00-00:00), Notte (00:00-6:00)	Si, in entrambi i pasti	Si	Si	Dalle 3 alle 5 ore	Qualche volta	Qualche volta	Thriller, Drama, Commedia, Anime, Fantascientifiche, Horror, Crime, Serie Animate	American Horror Story One Day At A Time Thirteen Reasons Why	Piattaforme On-Demand (Sky Online, Infinity, Netflix, Mediaset Premium, NowTV, TimVision)	Si	Solo	Mattina (6:00-13:00), Sera (18:00-00:00), Notte (00:00-6:00)	Si, in entrambi i pasti	Sempre	Sempre	Qualche Volta	5	7	4	7	25	18	12	9	64	MODERATE_BW	24	16	26	66	56	19	41
199	18	Male	1.85	87.5	25.5661	Single	Diploma	13	Studente/ssa	0	Genitori	0	0		3	Pomeriggio (13:00-18:00)	Si, solo a cena	Si	Si	3/4 ore	Raramente	Raramente	Thriller, Drama, Avventura, Anime, Fantascientifiche, Horror, Medical Drama, Crime, Musical, Western, Serie Animate	Tante	Scarico gli episodi e li guardo alla Tv	No	Solo	Notte (00:00-6:00)	No	Sempre	Sempre	Quasi Mai	5	7	4/5 ore	5	33	13	10	8	64	MODERATE_BW	20	11	16	47	56	4	24
200	18	Male	1.82	148	44.6806	Single	Licenza Media	13	Studente/ssa	0	Genitori	0		15	0.5	Sera (18:00-00:00), Notte (00:00-6:00)	Si, in entrambi i pasti	Si	Si	Dalle 3 alle 5 ore	Qualche volta	Qualche volta	Thriller, Drama, Commedia, Anime, Fantascientifiche, Horror, Crime, Serie Animate	American Horror Story One Day At A Time Thirteen Reasons Why	Piattaforme On-Demand (Sky Online, Infinity, Netflix, Mediaset Premium, NowTV, TimVision)	Si	Solo	Mattina (6:00-13:00), Sera (18:00-00:00), Notte (00:00-6:00)	Si, in entrambi i pasti	Sempre	Sempre	Qualche Volta	5	7	4	7	25	18	12	9	64	MODERATE_BW	24	16	26	66	56	19	41
201	18	Male	1.71	69	23.597	Single	Diploma	13	Studente/ssa	0	Genitori	2	1	20	0	Sera (18:00-00:00)	Si, in entrambi i pasti	No	Si	4	Qualche volta	Raramente	Fantascientifiche, Crime	Grey's Anatomy. Agent's of S.H.I.E.L.D. The Walking Dead	Piattaforme On-Demand (Sky Online, Infinity, Netflix, Mediaset Premium, NowTV, TimVision), Streaming on-line	Si	Solo	Pomeriggio (13:00-18:00), Sera (18:00-00:00)	Si, solo a pranzo	Mai	Mai	Quasi Mai	4	3	4	4	32	12	8	15	67	MODERATE_BW	28	23	25	76	50	9	91
202	18	Male	1.71	69	23.597	Single	Diploma	13	Studente/ssa	0	Genitori	2	1	20	0	Sera (18:00-00:00)	Si, in entrambi i pasti	No	Si	4	Qualche volta	Raramente	Fantascientifiche, Crime	Grey's Anatomy. Agent's of S.H.I.E.L.D. The Walking Dead	Piattaforme On-Demand (Sky Online, Infinity, Netflix, Mediaset Premium, NowTV, TimVision), Streaming on-line	Si	Solo	Pomeriggio (13:00-18:00), Sera (18:00-00:00)	Si, solo a pranzo	Mai	Mai	Quasi Mai	4	3	4	4	32	12	8	15	67	MODERATE_BW	28	23	25	76	50	9	91
203	19	Male	1.7	61	21.1073	Single	Diploma	13	Studente/ssa	1	Genitori	4	3	10	2	Sera (18:00-00:00), Notte (00:00-6:00)	Si, solo a pranzo	No	Si	3	Raramente	Sempre	Thriller, Drama, Crime	Gotham, Romanzo Criminale, How I met your mother	Televisore, Piattaforme On-Demand (Sky Online, Infinity, Netflix, Mediaset Premium, NowTV, TimVision)	Si	Solo	Sera (18:00-00:00)	Si, solo a cena	Sempre	Sempre	Sempre	6	8	6	7	22	13	10	9	54	MODERATE_BW	15	11	20	46	55	23	30
204	19	Male	1.7	61	21.1073	Single	Diploma	13	Studente/ssa	1	Genitori	4	3	10	2	Sera (18:00-00:00), Notte (00:00-6:00)	Si, solo a pranzo	No	Si	3	Raramente	Sempre	Thriller, Drama, Crime	Gotham, Romanzo Criminale, How I met your mother	Televisore, Piattaforme On-Demand (Sky Online, Infinity, Netflix, Mediaset Premium, NowTV, TimVision)	Si	Solo	Sera (18:00-00:00)	Si, solo a cena	Sempre	Sempre	Sempre	6	8	6	7	22	13	10	9	54	MODERATE_BW	15	11	20	46	55	23	30
205	19	Male	1.73	65	21.7181	Fidanzato/a	Diploma	13	Studente/ssa	0	Genitori	2	0	50	0	Sera (18:00-00:00), Notte (00:00-6:00)	Si, solo a cena	No	Si	2 ore	Spesso	Spesso	Thriller, Drama, Commedia, Crime, Serie Animate	Friends, Black Mirror, Griffin	Piattaforme On-Demand (Sky Online, Infinity, Netflix, Mediaset Premium, NowTV, TimVision)	Si	Solo	Sera (18:00-00:00), Notte (00:00-6:00)	Si, in entrambi i pasti	Sempre	Sempre	Mai	3	4	2.5 ore	3	25	17	9	5	56	MODERATE_BW	21	18	16	55	51	6	62
206	19	Male	1.73	65	21.7181	Fidanzato/a	Diploma	13	Studente/ssa	0	Genitori	2	0	50	0	Sera (18:00-00:00), Notte (00:00-6:00)	Si, solo a cena	No	Si	2 ore	Spesso	Spesso	Thriller, Drama, Commedia, Crime, Serie Animate	Friends, Black Mirror, Griffin	Piattaforme On-Demand (Sky Online, Infinity, Netflix, Mediaset Premium, NowTV, TimVision)	Si	Solo	Sera (18:00-00:00), Notte (00:00-6:00)	Si, in entrambi i pasti	Sempre	Sempre	Mai	3	4	2.5 ore	3	25	17	9	5	56	MODERATE_BW	21	18	16	55	51	6	62
207	19	Male	1.82	67	20.227	Single	Diploma	16	Studente/ssa	1	Appartamento Condiviso	3	5	3	1	Sera (18:00-00:00)	Si, solo a cena	No	Si	3 ore	Qualche volta	Qualche volta	Commedia, Fantascientifiche, Crime	Friends, Daredevil, House of cards	Piattaforme On-Demand (Sky Online, Infinity, Netflix, Mediaset Premium, NowTV, TimVision)	Si	Solo	Pomeriggio (13:00-18:00), Sera (18:00-00:00)	Si, in entrambi i pasti	Spesso	Sempre	Quasi Mai	5	7	6	2	28	15	8	6	57	MODERATE_BW	25	18	33	76	59	13	61
208	19	Male	1.82	67	20.227	Single	Diploma	16	Studente/ssa	1	Appartamento Condiviso	3	5	3	1	Sera (18:00-00:00)	Si, solo a cena	No	Si	3 ore	Qualche volta	Qualche volta	Commedia, Fantascientifiche, Crime	Friends, Daredevil, House of cards	Piattaforme On-Demand (Sky Online, Infinity, Netflix, Mediaset Premium, NowTV, TimVision)	Si	Solo	Pomeriggio (13:00-18:00), Sera (18:00-00:00)	Si, in entrambi i pasti	Spesso	Sempre	Quasi Mai	5	7	6	2	28	15	8	6	57	MODERATE_BW	25	18	33	76	59	13	61
209	20	Male	1.85	80	23.3747	Single	Diploma	13	Studente/ssa	0	Appartamento Condiviso	3	10	20	2	Mattina (6:00-13:00), Sera (18:00-00:00), Notte (00:00-6:00)	Si, in entrambi i pasti	No	Si	4-5	Qualche volta	Qualche volta	Thriller, Avventura, Commedia, Anime, Documentaristiche, Fantascientifiche, Serie Animate	Vikings, agents of shield, Arrow, flash, the big bang theory	Piattaforme On-Demand (Sky Online, Infinity, Netflix, Mediaset Premium, NowTV, TimVision), Streaming on-line	Si	Solo	Pomeriggio (13:00-18:00), Sera (18:00-00:00), Notte (00:00-6:00)	No	Sempre	Sempre	Mai	7	8	4	7	22	15	7	8	52	MODERATE_BW	23	22	29	74	50	12	86
210	20	Male	1.85	80	23.3747	Single	Diploma	13	Studente/ssa	0	Appartamento Condiviso	3	10	20	2	Mattina (6:00-13:00), Sera (18:00-00:00), Notte (00:00-6:00)	Si, in entrambi i pasti	No	Si	4-5	Qualche volta	Qualche volta	Thriller, Avventura, Commedia, Anime, Documentaristiche, Fantascientifiche, Serie Animate	Vikings, agents of shield, Arrow, flash, the big bang theory	Piattaforme On-Demand (Sky Online, Infinity, Netflix, Mediaset Premium, NowTV, TimVision), Streaming on-line	Si	Solo	Pomeriggio (13:00-18:00), Sera (18:00-00:00), Notte (00:00-6:00)	No	Sempre	Sempre	Mai	7	8	4	7	22	15	7	8	52	MODERATE_BW	23	22	29	74	50	12	86
211	21	Male	1.8	65	20.0617	Single	Diploma	16	Studente/ssa	1	Solo	2	2	1	1	Mattina (6:00-13:00), Pomeriggio (13:00-18:00), Sera (18:00-00:00)	No	No	Si	6	Spesso	Spesso	Drama, Avventura, Commedia, Fantascientifiche, Crime	How I Met Your Mother, Bojack Horsemen, House of Cards	Piattaforme On-Demand (Sky Online, Infinity, Netflix, Mediaset Premium, NowTV, TimVision), Streaming on-line	Si	Solo	Mattina (6:00-13:00), Pomeriggio (13:00-18:00), Sera (18:00-00:00)	Si, in entrambi i pasti	Sempre	Spesso	Spesso	2	5	3	4	22	14	9	8	53	MODERATE_BW	25	20	18	63	59	21	45
212	21	Male	1.8	65	20.0617	Single	Diploma	16	Studente/ssa	1	Solo	2	2	1	1	Mattina (6:00-13:00), Pomeriggio (13:00-18:00), Sera (18:00-00:00)	No	No	Si	6	Spesso	Spesso	Drama, Avventura, Commedia, Fantascientifiche, Crime	How I Met Your Mother, Bojack Horsemen, House of Cards	Piattaforme On-Demand (Sky Online, Infinity, Netflix, Mediaset Premium, NowTV, TimVision), Streaming on-line	Si	Solo	Mattina (6:00-13:00), Pomeriggio (13:00-18:00), Sera (18:00-00:00)	Si, in entrambi i pasti	Sempre	Spesso	Spesso	2	5	3	4	22	14	9	8	53	MODERATE_BW	25	20	18	63	59	21	45
213	21	Male	1.7	80	27.6817	Single	Diploma	13	Lavoro Fisico	1	Genitori	0	0		1	Mattina (6:00-13:00), Pomeriggio (13:00-18:00), Sera (18:00-00:00)	Si, in entrambi i pasti	No	Si	8 ore	Qualche volta	Raramente	Thriller, Drama, Commedia, Fantascientifiche, Horror	Arrow, flash, sense8	Piattaforme On-Demand (Sky Online, Infinity, Netflix, Mediaset Premium, NowTV, TimVision), Streaming on-line	Si	Solo	Pomeriggio (13:00-18:00), Sera (18:00-00:00), Notte (00:00-6:00)	No	Sempre	Sempre	Spesso	3	10+	12 ore	4	28	14	11	9	62	MODERATE_BW	15	13	26	54	46	12	62
214	21	Male	1.7	80	27.6817	Single	Diploma	13	Lavoro Fisico	1	Genitori	0	0		1	Mattina (6:00-13:00), Pomeriggio (13:00-18:00), Sera (18:00-00:00)	Si, in entrambi i pasti	No	Si	8 ore	Qualche volta	Raramente	Thriller, Drama, Commedia, Fantascientifiche, Horror	Arrow, flash, sense8	Piattaforme On-Demand (Sky Online, Infinity, Netflix, Mediaset Premium, NowTV, TimVision), Streaming on-line	Si	Solo	Pomeriggio (13:00-18:00), Sera (18:00-00:00), Notte (00:00-6:00)	No	Sempre	Sempre	Spesso	3	10+	12 ore	4	28	14	11	9	62	MODERATE_BW	15	13	26	54	46	12	62
215	22	Male	1.75	94	30.6939	Single	Diploma	13	Studente/ssa	0	Genitori e fratello	2			1	Sera (18:00-00:00)	Si, solo a cena	No	Si	Non so quanto ma ultimamente ci perdo molte ore	Spesso	Spesso	Avventura, Fantascientifiche, Medical Drama, Crime	Supernatural Lucifer Shadowhunters The Big Bang Theory	Televisore, Streaming on-line	No	Solo	Pomeriggio (13:00-18:00), Sera (18:00-00:00), Notte (00:00-6:00)	No	Spesso	Qualche Volta	Mai	7	4	4/5	5	34	16	9	8	67	MODERATE_BW	26	19	22	67	63	22	104
216	22	Male	1.75	94	30.6939	Single	Diploma	13	Studente/ssa	0	Genitori e fratello	2			1	Sera (18:00-00:00)	Si, solo a cena	No	Si	Non so quanto ma ultimamente ci perdo molte ore	Spesso	Spesso	Avventura, Fantascientifiche, Medical Drama, Crime	Supernatural Lucifer Shadowhunters The Big Bang Theory	Televisore, Streaming on-line	No	Solo	Pomeriggio (13:00-18:00), Sera (18:00-00:00), Notte (00:00-6:00)	No	Spesso	Qualche Volta	Mai	7	4	4/5	5	34	16	9	8	67	MODERATE_BW	26	19	22	67	63	22	104
217	23	Male	1.66	63	22.8625	Single	Laurea Magistrale	18	Studente/ssa	0	Genitori	1	7	15	5	Pomeriggio (13:00-18:00), Sera (18:00-00:00)	Si, in entrambi i pasti	Si	Si	3	Qualche volta	Qualche volta	Avventura, Commedia, Fantascientifiche, Crime	Game Of Thrones; Criminal Minds; La casa de Papel	Televisore, Piattaforme On-Demand (Sky Online, Infinity, Netflix, Mediaset Premium, NowTV, TimVision), Streaming on-line	Si	Solo	Sera (18:00-00:00), Notte (00:00-6:00)	Si, solo a cena	Spesso	Spesso	Quasi Mai	2	8	8-9	2	24	15	7	8	54	MODERATE_BW	28	17	18	63	40	9	36
218	23	Male	1.66	63	22.8625	Single	Laurea Magistrale	18	Studente/ssa	0	Genitori	1	7	15	5	Pomeriggio (13:00-18:00), Sera (18:00-00:00)	Si, in entrambi i pasti	Si	Si	3	Qualche volta	Qualche volta	Avventura, Commedia, Fantascientifiche, Crime	Game Of Thrones; Criminal Minds; La casa de Papel	Televisore, Piattaforme On-Demand (Sky Online, Infinity, Netflix, Mediaset Premium, NowTV, TimVision), Streaming on-line	Si	Solo	Sera (18:00-00:00), Notte (00:00-6:00)	Si, solo a cena	Spesso	Spesso	Quasi Mai	2	8	8-9	2	24	15	7	8	54	MODERATE_BW	28	17	18	63	40	9	36
219	25	Male	1.78	65	20.5151	Single	Diploma	13	Lavoro Intellettuale	0	Genitori	3	5	12	1	Sera (18:00-00:00)	Si, in entrambi i pasti	No	Si	5h	Qualche volta	Qualche volta	Thriller, Avventura, Commedia, Anime, Fantascientifiche, Medical Drama, Crime, Serie Animate	Sense 8, Orange is the new black, stranger things, shameless, game of thrones, Gotham, Grace and frankie, the oa, one piece, boruto	Piattaforme On-Demand (Sky Online, Infinity, Netflix, Mediaset Premium, NowTV, TimVision), Streaming on-line	Si	Solo	Pomeriggio (13:00-18:00), Sera (18:00-00:00)	Si, in entrambi i pasti	Mai	Mai	Spesso	7	6	5h	7	30	10	9	5	54	MODERATE_BW	10	12	21	43	59	15	80
220	25	Male	1.78	65	20.5151	Single	Diploma	13	Lavoro Intellettuale	0	Genitori	3	5	12	1	Sera (18:00-00:00)	Si, in entrambi i pasti	No	Si	5h	Qualche volta	Qualche volta	Thriller, Avventura, Commedia, Anime, Fantascientifiche, Medical Drama, Crime, Serie Animate	Sense 8, Orange is the new black, stranger things, shameless, game of thrones, Gotham, Grace and frankie, the oa, one piece, boruto	Piattaforme On-Demand (Sky Online, Infinity, Netflix, Mediaset Premium, NowTV, TimVision), Streaming on-line	Si	Solo	Pomeriggio (13:00-18:00), Sera (18:00-00:00)	Si, in entrambi i pasti	Mai	Mai	Spesso	7	6	5h	7	30	10	9	5	54	MODERATE_BW	10	12	21	43	59	15	80
221	25	Male	1.8	90	27.7778	Single	Diploma	13	Studente/ssa	0	Solo	0	0	7	0	Pomeriggio (13:00-18:00), Sera (18:00-00:00)	Si, in entrambi i pasti	Si	Si	4	Raramente	Raramente	Drama, Commedia, Medical Drama, Serie Animate	How I met your mother, The big bang theory, Death Note	Piattaforme On-Demand (Sky Online, Infinity, Netflix, Mediaset Premium, NowTV, TimVision), Streaming on-line	Si	Solo	Pomeriggio (13:00-18:00), Sera (18:00-00:00)	Si, in entrambi i pasti	Sempre	Sempre	Sempre	7	4	2	7	27	12	10	8	57	MODERATE_BW	21	19	26	66	54	16	60
222	25	Male	1.8	90	27.7778	Single	Diploma	13	Studente/ssa	0	Solo	0	0	7	0	Pomeriggio (13:00-18:00), Sera (18:00-00:00)	Si, in entrambi i pasti	Si	Si	4	Raramente	Raramente	Drama, Commedia, Medical Drama, Serie Animate	How I met your mother, The big bang theory, Death Note	Piattaforme On-Demand (Sky Online, Infinity, Netflix, Mediaset Premium, NowTV, TimVision), Streaming on-line	Si	Solo	Pomeriggio (13:00-18:00), Sera (18:00-00:00)	Si, in entrambi i pasti	Sempre	Sempre	Sempre	7	4	2	7	27	12	10	8	57	MODERATE_BW	21	19	26	66	54	16	60
223	33	Male	1.7	72	24.9135	Single	Laurea Magistrale	18	Lavoro Intellettuale	0	Genitori	0	30	10	15	Pomeriggio (13:00-18:00), Sera (18:00-00:00), Notte (00:00-6:00)	Si, in entrambi i pasti	No	Si	10	Mai	Mai	Thriller, Drama, Avventura, Commedia, Anime, Biografiche, Fantascientifiche, Medical Drama, Crime, Serie Animate	Once upon a time; Shadowhunter;	Piattaforme On-Demand (Sky Online, Infinity, Netflix, Mediaset Premium, NowTV, TimVision), Streaming on-line	No	Con la famiglia	Sera (18:00-00:00), Notte (00:00-6:00)	No	Qualche Volta	Qualche Volta	Mai	3	9	10	2	38	7	3	11	59	MODERATE_BW	18	16	28	62	60	19	91
224	33	Male	1.7	72	24.9135	Single	Laurea Magistrale	18	Lavoro Intellettuale	0	Genitori	0	30	10	15	Pomeriggio (13:00-18:00), Sera (18:00-00:00), Notte (00:00-6:00)	Si, in entrambi i pasti	No	Si	10	Mai	Mai	Thriller, Drama, Avventura, Commedia, Anime, Biografiche, Fantascientifiche, Medical Drama, Crime, Serie Animate	Once upon a time; Shadowhunter;	Piattaforme On-Demand (Sky Online, Infinity, Netflix, Mediaset Premium, NowTV, TimVision), Streaming on-line	No	Con la famiglia	Sera (18:00-00:00), Notte (00:00-6:00)	No	Qualche Volta	Qualche Volta	Mai	3	9	10	2	38	7	3	11	59	MODERATE_BW	18	16	28	62	60	19	91
225	22	Female	1.59	51	20.1733	Single	Laurea Triennale	16	Studente/ssa	1	Appartamento Condiviso	2	30	7	1	Sera (18:00-00:00)	Si, solo a cena	No	Si	0-1	Mai	Mai	Avventura, Anime, Biografiche, Documentaristiche, Medical Drama	Narcos, got, sense8	Streaming on-line	No	Solo	Sera (18:00-00:00)	No	Qualche Volta	Quasi Mai	Mai	2	4	4	2	0	2	1	0	3	PROBLEMATIC_BW	21	15	24	60	40	7	15
226	22	Female	1.58	52	20.83	Fidanzato/a	Diploma	13	Studente/ssa	1	Genitori	1	5	3	1	Sera (18:00-00:00)	Si, solo a cena	No	Si	1	Raramente	Raramente	Avventura, Fantascientifiche, Medical Drama, Crime	Game of thrones, the big bang theory, peaky blinders	Piattaforme On-Demand (Sky Online, Infinity, Netflix, Mediaset Premium, NowTV, TimVision)	Si	Solo	Sera (18:00-00:00)	No	Quasi Mai	Qualche Volta	Mai	1	2	2	1	3	1	1	1	6	PROBLEMATIC_BW	8	6	9	23	39	7	27
227	22	Female	1.59	47	18.591	Single	Laurea Triennale	16	Studente/ssa	1	Genitori	1	2	1	0	Sera (18:00-00:00)	Si, solo a cena	No	Si	Meno di 1	Qualche volta	Qualche volta	Commedia	Un medico in famiglia Provaci ancora prof Tutti pazzi per amore	Televisore	No	Con la famiglia	Sera (18:00-00:00)	Si, solo a cena	Mai	Mai	Mai	1	2	1	1	6	3	2	0	11	PROBLEMATIC_BW	7	6	10	23	31	0	9
228	22	Female	1.67	65	23.3067	Single	Laurea Triennale	19	Studente/ssa	0	Genitori	1	3	20	2	Sera (18:00-00:00)	Si, in entrambi i pasti	No	Si	2 ore	Raramente	Qualche volta	Avventura, Medical Drama	Grey's anatomy, blue bells, pretty little liar	Streaming on-line	No	Solo	Notte (00:00-6:00)	No	Qualche Volta	Quasi Mai	Mai	1	4	2	1	4	4	3	0	11	PROBLEMATIC_BW	10	10	12	32	45	6	15
229	22	Female	1.77	68	21.7051	Single	Licenza Media	6	Studente/ssa	1	Sorella	1	28	40	2	Notte (00:00-6:00)	Si, solo a pranzo	No	Si	2	Qualche volta	Qualche volta	Avventura, Commedia, Fantascientifiche, Serie Animate	Il trono di spade, supernatural, Vikings	Streaming on-line	No	Solo	Notte (00:00-6:00)	No	Spesso	Spesso	Mai	5	7	8	4	8	2	2	0	12	PROBLEMATIC_BW	11	21	23	55	59	23	84
230	22	Female	1.65	80	29.3848	Fidanzato/a	Laurea Triennale	16	Studente/ssa	0	Appartamento Condiviso	2	10	10	1	Sera (18:00-00:00)	Si, solo a cena	No	Si	3 ore	Raramente	Mai	Thriller, Avventura, Anime, Fantascientifiche, Horror, Crime, Serie Animate	GOT, Bojack Horseman, Vikings	Streaming on-line	No	Solo	Mattina (6:00-13:00), Pomeriggio (13:00-18:00)	No	Qualche Volta	Quasi Mai	Mai	1	4	3 ore	1	5	3	4	0	12	PROBLEMATIC_BW	7	6	10	23	43	3	50
231	22	Female	1.6	53	20.7031	Fidanzato/a	Diploma	15	Studente/ssa	1	Appartamento Condiviso	2	10	10	0	Sera (18:00-00:00)	No	No	Si	1	Raramente	Raramente	Avventura, Medical Drama, Crime	Romanzo criminale, la casa di carta, peaky blinders	Piattaforme On-Demand (Sky Online, Infinity, Netflix, Mediaset Premium, NowTV, TimVision)	Si	Con amici	Sera (18:00-00:00)	No	Mai	Mai	Quasi Mai	1	3	2	1	8	2	3	0	13	PROBLEMATIC_BW	13	5	15	33	44	6	25
232	22	Female	1.67	66	23.6652	Fidanzato/a	Laurea Triennale	16	Lavoro Intellettuale	1	Genitori	4	4	2	0.5	Sera (18:00-00:00)	Si, solo a cena	No	Si	50 min	Mai	Mai	Thriller, Commedia, Fantascientifiche, Crime	Pretty Little Liars, Big Bang Theory, Sons of Anarchy	Piattaforme On-Demand (Sky Online, Infinity, Netflix, Mediaset Premium, NowTV, TimVision), Streaming on-line	Si	Con il partner	Pomeriggio (13:00-18:00), Sera (18:00-00:00)	No	Qualche Volta	Mai	Mai	1	2	2 h	1	5	4	4	0	13	PROBLEMATIC_BW	7	11	13	31	30	2	13
233	22	Female	1.65	49	17.9982	Single	Diploma	19	Studente/ssa	0	Genitori	2	5	12	4	Sera (18:00-00:00)	Si, in entrambi i pasti	No	Si	2	Qualche volta	Mai	Commedia, Documentaristiche, Medical Drama	Grey’s Anatomy La Casa de Papel Suburra	Televisore, Piattaforme On-Demand (Sky Online, Infinity, Netflix, Mediaset Premium, NowTV, TimVision), Streaming on-line	Si	Solo	Pomeriggio (13:00-18:00)	No	Sempre	Sempre	Mai	1	2	2	1	10	3	1	0	14	PROBLEMATIC_BW	7	7	14	28	34	1	10
234	22	Female	1.69	48	16.8061	Single	Diploma	13	Disoccupato/a	1	Genitori	0	1	1	1	Pomeriggio (13:00-18:00), Sera (18:00-00:00)	Si, in entrambi i pasti	Si	Si	3	Qualche volta	Qualche volta	Thriller, Avventura, Commedia, Fantascientifiche, Horror, Crime	Blindspot , American horror story, the 100	Piattaforme On-Demand (Sky Online, Infinity, Netflix, Mediaset Premium, NowTV, TimVision), Streaming on-line	Si	Con il partner	Sera (18:00-00:00), Notte (00:00-6:00)	No	Sempre	Sempre	Quasi Mai	4	4	3	2	5	7	2	0	14	PROBLEMATIC_BW	7	9	23	39	42	1	17
235	22	Female	1.68	65	23.03	Fidanzato/a	Laurea Triennale	16	Studente/ssa	0	Genitori	3	2	3	3	Pomeriggio (13:00-18:00), Sera (18:00-00:00)	Si, solo a pranzo	No	Si	2	Spesso	Spesso	Thriller, Commedia, Documentaristiche	“Friends”, “Le regole del delitto imperfetto”, “stranger things	Piattaforme On-Demand (Sky Online, Infinity, Netflix, Mediaset Premium, NowTV, TimVision)	No	Con il partner	Sera (18:00-00:00)	Si, solo a cena	Quasi Mai	Mai	Qualche Volta	1	3	4	2	4	6	3	1	14	PROBLEMATIC_BW	11	11	15	37	39	13	17
236	22	Female	1.6	65	25.3906	Single	Laurea Triennale	13	Studente/ssa	0	Appartamento Condiviso	1	7	14	0.5	Sera (18:00-00:00)	Si, solo a pranzo	No	Si	1/2 ore, non tutti i giorni	Qualche volta	Spesso	Drama, Avventura, Commedia, Biografiche, Crime	Sens8, La casa di carta, Sherlock	Piattaforme On-Demand (Sky Online, Infinity, Netflix, Mediaset Premium, NowTV, TimVision), Streaming on-line	Si	Solo	Sera (18:00-00:00)	Si, solo a pranzo	Spesso	Mai	Qualche Volta	1	4	6 ore	1	6	5	4	0	15	PROBLEMATIC_BW	9	7	11	27	43	6	44
237	22	Female	1.6	51.6	20.1562	Single	Diploma	13	Studente/ssa	1	Genitori	0	20	15	4	Pomeriggio (13:00-18:00)	Si, in entrambi i pasti	No	Si	4	Raramente	Qualche volta	Drama, Avventura, Commedia, Biografiche, Documentaristiche, Medical Drama, Crime, Western	Lucifer, Chicago pd, Bosch	Streaming on-line	No	Solo	Mattina (6:00-13:00)	No	Qualche Volta	Spesso	Qualche Volta	2	4	3.30	1	7	4	5	0	16	PROBLEMATIC_BW	7	5	16	28	31	0	32
238	22	Female	1.7	62	21.4533	Fidanzato/a	Diploma	13	Studente/ssa	1	Genitori	1.2	0	4	3	Pomeriggio (13:00-18:00), Sera (18:00-00:00)	Si, solo a pranzo	No	Si	1-2 ore	Qualche volta	Qualche volta	Thriller, Commedia	Gossip girl, grey’s anatomy, romanzo criminale	Televisore, Piattaforme On-Demand (Sky Online, Infinity, Netflix, Mediaset Premium, NowTV, TimVision)	Si	Solo	Pomeriggio (13:00-18:00)	Si, solo a pranzo	Spesso	Sempre	Mai	3	3	2 ore	3	8	7	3	0	18	PROBLEMATIC_BW	20	12	17	49	48	1	44
239	22	Female	1.65	90	33.0579	Fidanzato/a	Diploma	13	Casalingo/a	1	Genitori	1	8	6	9	Pomeriggio (13:00-18:00), Sera (18:00-00:00)	Si, in entrambi i pasti	Si	Si	9 ore	Raramente	Raramente	Avventura, Anime, Fantascientifiche, Serie Animate	Una mamma per amica Sherlock Casa di carta	Televisore, Piattaforme On-Demand (Sky Online, Infinity, Netflix, Mediaset Premium, NowTV, TimVision)	Si	Solo	Pomeriggio (13:00-18:00), Sera (18:00-00:00)	Si, in entrambi i pasti	Spesso	Spesso	Quasi Mai	5	4	4 ore	4	8	3	7	0	18	PROBLEMATIC_BW	7	11	16	34	32	3	20
240	22	Female	1.58	56	22.4323	Single	Diploma	13	Studente/ssa	1	Appartamento Condiviso	1	1	2	1	Pomeriggio (13:00-18:00), Sera (18:00-00:00)	Si, in entrambi i pasti	No	Si	1	Raramente	Mai	Drama, Commedia, Anime, Biografiche, Fantascientifiche, Medical Drama, Crime	Narcos,13 reasons why,game of Thrones	Piattaforme On-Demand (Sky Online, Infinity, Netflix, Mediaset Premium, NowTV, TimVision), Streaming on-line	No	Solo	Sera (18:00-00:00), Notte (00:00-6:00)	No	Mai	Mai	Mai	1	4	4	1	8	4	6	0	18	PROBLEMATIC_BW	9	5	17	31	47	4	29
241	22	Female	1.52	64	27.7008	Fidanzato/a	Laurea Triennale	16	Studente/ssa	1	Appartamento Condiviso	4	14	20	1	Pomeriggio (13:00-18:00)	No	No	Si	1 ora	Raramente	Raramente	Thriller, Drama, Avventura, Commedia, Biografiche, Fantascientifiche, Musical	Jane the Virgin, game or Thrones, riverdale, once Upon a Time, lovesick	Piattaforme On-Demand (Sky Online, Infinity, Netflix, Mediaset Premium, NowTV, TimVision), Streaming on-line	Si	Solo	Sera (18:00-00:00)	Si, solo a cena	Spesso	Spesso	Sempre	2	4	3	1	4	9	8	0	21	PROBLEMATIC_BW	19	23	21	63	57	8	91
242	22	Female	1.63	47	17.6898	Fidanzato/a	Laurea Triennale	22	Studente/ssa	1	Fratello	0	7	14	3	Sera (18:00-00:00)	No	Si	Si	3 ore	Qualche volta	Raramente	Thriller, Commedia, Anime, Documentaristiche, Crime	I griffin, Archer, better call soul	Piattaforme On-Demand (Sky Online, Infinity, Netflix, Mediaset Premium, NowTV, TimVision), Streaming on-line	Si	Solo	Notte (00:00-6:00)	Si, in entrambi i pasti	Mai	Mai	Quasi Mai	3	2	3	2	10	6	3	2	21	PROBLEMATIC_BW	17	14	21	52	46	12	27
243	22	Female	1.65	56	20.5693	Single	Diploma	18	Studente/ssa	1	Genitori	3	4	8	1	Pomeriggio (13:00-18:00), Sera (18:00-00:00)	Si, solo a pranzo	No	Si	2	Raramente	Raramente	Drama, Commedia	Friends Stranger Things Shadowhunters	Piattaforme On-Demand (Sky Online, Infinity, Netflix, Mediaset Premium, NowTV, TimVision)	Si	Con la famiglia	Pomeriggio (13:00-18:00)	Si, solo a pranzo	Sempre	Sempre	Mai	6	5	2.3	4	13	6	2	0	21	PROBLEMATIC_BW	9	6	20	35	50	11	38
244	22	Female	1.65	60	22.0386	Single	Laurea Triennale	16	Studente/ssa	1	Solo	1	6	28	1	Notte (00:00-6:00)	No	Si	Si	3	Mai	Mai	Drama, Commedia, Medical Drama, Crime, Musical	Riverdale una mamma per amica friends	Piattaforme On-Demand (Sky Online, Infinity, Netflix, Mediaset Premium, NowTV, TimVision), Streaming on-line	Si	Solo	Sera (18:00-00:00), Notte (00:00-6:00)	Si, in entrambi i pasti	Sempre	Sempre	Qualche Volta	5	7	4	5	8	7	9	0	24	PROBLEMATIC_BW	9	19	9	37	49	5	40
245	22	Female	1.56	77	31.6404	Sposato/a o Convivente	Diploma	13	Lavoro Intellettuale	1	Coniuge (o fidanzato/a)	1	0	7	2	Sera (18:00-00:00), Notte (00:00-6:00)	Si, in entrambi i pasti	No	Si	2	Raramente	Mai	Thriller, Avventura, Fantascientifiche, Horror, Crime	Game of thrones, gossip girl, la casa di carta	Piattaforme On-Demand (Sky Online, Infinity, Netflix, Mediaset Premium, NowTV, TimVision), Streaming on-line	Si	Solo	Pomeriggio (13:00-18:00), Sera (18:00-00:00), Notte (00:00-6:00)	Si, solo a pranzo	Sempre	Sempre	Quasi Mai	4	4	2.30	5	9	9	4	3	25	PROBLEMATIC_BW	11	11	16	38	40	7	69
246	22	Female	1.65	40	14.6924	Fidanzato/a	Laurea Triennale	19	Studente/ssa	0	Genitori	1	7	10	1	Sera (18:00-00:00), Notte (00:00-6:00)	Si, solo a cena	Si	Si	2	Spesso	Spesso	Drama, Avventura, Horror, Medical Drama	The walking dead, grey's anatomy, the 100	Piattaforme On-Demand (Sky Online, Infinity, Netflix, Mediaset Premium, NowTV, TimVision), Streaming on-line	Si	Solo	Sera (18:00-00:00), Notte (00:00-6:00)	No	Spesso	Spesso	Mai	4	3	3	3	15	8	3	0	26	PROBLEMATIC_BW	21	12	15	48	54	11	96
247	22	Female	1.6	67	26.1719	Sposato/a o Convivente	Diploma	13	Studente/ssa	0	Coniuge (o fidanzato/a)	2	2	10	2	Sera (18:00-00:00), Notte (00:00-6:00)	Si, solo a pranzo	Si	Si	3 ore	Qualche volta	Spesso	Horror, Serie Animate	Breaking bad Rick e Morty Stranger Things	Piattaforme On-Demand (Sky Online, Infinity, Netflix, Mediaset Premium, NowTV, TimVision)	Si	Con il partner	Sera (18:00-00:00)	Si, in entrambi i pasti	Spesso	Spesso	Mai	3	10+	9	2	10	8	5	3	26	PROBLEMATIC_BW	10	7	17	34	40	11	71
248	22	Female	1.65	49	17.9982	Fidanzato/a	Diploma	13	Lavoro Fisico	1	Genitori	3	7	40	2	Sera (18:00-00:00)	Si, solo a cena	No	Si	2 ore	Raramente	Raramente	Thriller, Drama, Documentaristiche, Medical Drama, Crime	Le regole del delitto perfetto, suits, grey’s anatomy	Piattaforme On-Demand (Sky Online, Infinity, Netflix, Mediaset Premium, NowTV, TimVision), Streaming on-line	Si	Solo	Sera (18:00-00:00)	No	Spesso	Spesso	Mai	2	3	3	1	9	9	7	2	27	PROBLEMATIC_BW	21	17	21	59	58	13	45
249	22	Female	1.58	48	19.2277	Single	Diploma	13	Studente/ssa	1	Appartamento Condiviso	4	14	8	1	Pomeriggio (13:00-18:00), Sera (18:00-00:00)	Si, in entrambi i pasti	No	Si	2	Qualche volta	Qualche volta	Thriller, Drama, Avventura, Commedia, Biografiche, Fantascientifiche, Horror, Medical Drama, Crime	Peaky blinders, narcos, friends, GOT	Piattaforme On-Demand (Sky Online, Infinity, Netflix, Mediaset Premium, NowTV, TimVision), Streaming on-line	Si	Solo	Sera (18:00-00:00)	Si, solo a pranzo	Sempre	Sempre	Qualche Volta	4	5	3-4	2	8	10	6	3	27	PROBLEMATIC_BW	10	7	17	34	48	11	40
250	22	Female	1.56	50	20.5457	Fidanzato/a	Diploma	13	Studente/ssa	1	Coniuge (o fidanzato/a)	5	14	7	1	Sera (18:00-00:00), Notte (00:00-6:00)	Si, in entrambi i pasti	No	Si	1	Raramente	Raramente	Thriller, Drama, Avventura, Commedia, Documentaristiche, Fantascientifiche, Medical Drama, Crime, Musical	Grey's Anatomy, The Crown, This is us	Piattaforme On-Demand (Sky Online, Infinity, Netflix, Mediaset Premium, NowTV, TimVision), Streaming on-line	Si	Solo	Pomeriggio (13:00-18:00), Notte (00:00-6:00)	No	Qualche Volta	Quasi Mai	Qualche Volta	1	6	4	1	13	11	2	3	29	PROBLEMATIC_BW	18	8	13	39	49	16	41
251	22	Female	1.6	52	20.3125	Single	Diploma	13	Studente/ssa	0	Genitori	4	8	12	4	Pomeriggio (13:00-18:00), Sera (18:00-00:00)	Si, solo a pranzo	No	Si	2 ore	Raramente	Raramente	Commedia, Biografiche, Medical Drama, Crime, Musical	Santa Clarita diet How I met your mother Il trono di spade The good place	Televisore, Piattaforme On-Demand (Sky Online, Infinity, Netflix, Mediaset Premium, NowTV, TimVision)	Si	Solo	Pomeriggio (13:00-18:00)	No	Spesso	Spesso	Quasi Mai	2	4	2	1	14	5	8	2	29	PROBLEMATIC_BW	11	17	17	45	41	9	42
252	22	Female	1.58	51	20.4294	Fidanzato/a	Diploma	18	Lavoro Fisico	0	Convivo con la famiglia del mio fidanzato	0	10	2	2	Pomeriggio (13:00-18:00)	Si, in entrambi i pasti	No	Si	4 o 5 ore	Qualche volta	Qualche volta	Thriller, Drama, Biografiche	The game of throne, reign, the big bang theory.	Piattaforme On-Demand (Sky Online, Infinity, Netflix, Mediaset Premium, NowTV, TimVision)	Si	Solo	Pomeriggio (13:00-18:00), Sera (18:00-00:00)	No	Sempre	Sempre	Quasi Mai	6	6	6	6	12	7	6	4	29	PROBLEMATIC_BW	22	14	12	48	51	9	94
253	22	Female	1.72	56	18.9292	Fidanzato/a	Laurea Triennale	17	Studente/ssa	0	Coniuge (o fidanzato/a)	3	10	20	0	Sera (18:00-00:00), Notte (00:00-6:00)	No	Si	Si	1	Raramente	Qualche volta	Thriller, Drama, Commedia, Crime	Game of Thrones, New Girl, Prison Break	Piattaforme On-Demand (Sky Online, Infinity, Netflix, Mediaset Premium, NowTV, TimVision), Streaming on-line	Si	Con il partner	Sera (18:00-00:00), Notte (00:00-6:00)	Si, solo a pranzo	Mai	Mai	Mai	6	3	2	5	13	9	4	5	31	PROBLEMATIC_BW	17	15	18	50	49	15	68
254	22	Female	1.6	52	20.3125	Fidanzato/a	Diploma	17	Studente/ssa	1	Genitori	0	6	10	4	Sera (18:00-00:00)	Si, in entrambi i pasti	Si	Si	1	Mai	Raramente	Commedia, Biografiche	How I met your mother	Streaming on-line	No	Con il partner	Sera (18:00-00:00)	No	Spesso	Spesso	Mai	4	6	3	3	17	9	3	2	31	PROBLEMATIC_BW	13	9	20	42	52	6	69
255	22	Female	1.63	56	21.0772	Single	Diploma	19	Studente/ssa	1	Appartamento Condiviso	0	14	48	2	Pomeriggio (13:00-18:00), Sera (18:00-00:00)	Si, in entrambi i pasti	No	Si	5	Spesso	Spesso	Drama, Anime, Biografiche, Documentaristiche, Fantascientifiche, Crime, Storiche	Game of thrones, romanzo criminale, sense8, naruto	Piattaforme On-Demand (Sky Online, Infinity, Netflix, Mediaset Premium, NowTV, TimVision), Streaming on-line	Si	Solo	Pomeriggio (13:00-18:00), Sera (18:00-00:00), Notte (00:00-6:00)	Si, in entrambi i pasti	Qualche Volta	Spesso	Qualche Volta	4	5	5	4	15	9	6	1	31	PROBLEMATIC_BW	14	12	8	34	61	23	58
256	22	Female	1.59	57	22.5466	Single	Diploma	13	Studente/ssa	1	Appartamento Condiviso	1	10	10	1	Sera (18:00-00:00)	Si, solo a pranzo	No	Si	4/5 ore	Raramente	Raramente	Drama, Avventura, Commedia, Biografiche, Fantascientifiche, Medical Drama, Crime	Sense8, Gray's Anatomy, Gossip Girl	Piattaforme On-Demand (Sky Online, Infinity, Netflix, Mediaset Premium, NowTV, TimVision), Streaming on-line	Si	Solo	Sera (18:00-00:00), Notte (00:00-6:00)	Si, solo a pranzo	Sempre	Sempre	Qualche Volta	7	6	10	4	13	9	7	3	32	PROBLEMATIC_BW	8	13	20	41	52	16	59
257	22	Female	1.65	55	20.202	Single	Diploma	13	Disoccupato/a	0	Genitori	3	6		8	Pomeriggio (13:00-18:00), Notte (00:00-6:00)	Si, solo a cena	Si	Si	Gran parte della giornata	Sempre	Sempre	Fantascientifiche	Shadowhunters gossip girl the vampire diaries	Televisore, Piattaforme On-Demand (Sky Online, Infinity, Netflix, Mediaset Premium, NowTV, TimVision), Streaming on-line	Si	Solo	Pomeriggio (13:00-18:00), Notte (00:00-6:00)	No	Sempre	Sempre	Qualche Volta	7	7	6 ore	5	10	14	8	0	32	PROBLEMATIC_BW	13	13	16	42	69	33	61
258	22	Female	1.58	40	16.0231	Fidanzato/a	Diploma	13	Studente/ssa	1	Genitori	2	7		2	Pomeriggio (13:00-18:00), Sera (18:00-00:00), Notte (00:00-6:00)	Si, in entrambi i pasti	No	Si	4 ore	Raramente	Qualche volta	Thriller, Avventura, Anime, Fantascientifiche, Crime, Serie Animate	Magi, Doctor Who, Lie To Me	Televisore, Piattaforme On-Demand (Sky Online, Infinity, Netflix, Mediaset Premium, NowTV, TimVision), Streaming on-line, DVD	Si	Mio padre	Pomeriggio (13:00-18:00), Sera (18:00-00:00), Notte (00:00-6:00)	Si, in entrambi i pasti	Sempre	Sempre	Sempre	7	10+	5/6	4	14	8	4	7	33	PROBLEMATIC_BW	23	20	26	69	43	10	19
259	22	Female	1.67	52.5	18.8246	Single	Laurea Triennale	17	Studente/ssa	0	Appartamento Condiviso	0	7	5	1	Pomeriggio (13:00-18:00), Notte (00:00-6:00)	Si, in entrambi i pasti	No	Si	90 min	Raramente	Mai	Avventura, Commedia	how I met your mother, big bang theory, star trek	Piattaforme On-Demand (Sky Online, Infinity, Netflix, Mediaset Premium, NowTV, TimVision), Streaming on-line	Si	Solo	Notte (00:00-6:00)	No	Sempre	Mai	Mai	1	3	2	3	19	12	1	2	34	PROBLEMATIC_BW	17	17	21	55	56	24	44
260	22	Female	1.57	53	21.5019	Fidanzato/a	Diploma	13	Studente/ssa	1	Genitori	1	7	14	1	Mattina (6:00-13:00), Sera (18:00-00:00)	Si, solo a cena	No	Si	2-6 ore o anche più	Raramente	Raramente	Thriller, Drama, Avventura, Commedia, Documentaristiche, Fantascientifiche, Western	Pretty little liars, game of thrones, scrubbs	Piattaforme On-Demand (Sky Online, Infinity, Netflix, Mediaset Premium, NowTV, TimVision), Streaming on-line	Si	Solo	Mattina (6:00-13:00), Pomeriggio (13:00-18:00), Sera (18:00-00:00)	No	Sempre	Sempre	Qualche Volta	6	10+	10	4	18	5	9	2	34	PROBLEMATIC_BW	18	8	18	44	39	5	59
261	22	Female	1.64	61	22.68	Fidanzato/a	Diploma	19	Studente/ssa	1	Genitori	10	10	5	2	Pomeriggio (13:00-18:00)	No	No	Si	4	Raramente	Raramente	Thriller, Drama, Avventura, Commedia, Biografiche, Documentaristiche, Fantascientifiche, Medical Drama, Crime, Serie Animate	Grey's Anatomy, Once upon a Time, Modern family	Piattaforme On-Demand (Sky Online, Infinity, Netflix, Mediaset Premium, NowTV, TimVision), Streaming on-line	Si	Solo	Pomeriggio (13:00-18:00), Sera (18:00-00:00), Notte (00:00-6:00)	Si, solo a pranzo	Spesso	Spesso	Quasi Mai	3	2	3	6	14	8	8	5	35	PROBLEMATIC_BW	14	8	16	38	55	9	27
262	22	Female	1.71	50	17.0993	Single	Diploma	13	Studente/ssa	1	Solo	2	0	20	1	Notte (00:00-6:00)	No	Si	Si	3	Qualche volta	Qualche volta	Thriller, Drama, Avventura, Fantascientifiche, Crime	Travelers, HTGAW, Dc legends, Flash, Dirk Gently, 12 Monkeys, ...	Piattaforme On-Demand (Sky Online, Infinity, Netflix, Mediaset Premium, NowTV, TimVision), Streaming on-line	Si	Solo	Sera (18:00-00:00)	No	Spesso	Spesso	Mai	2	10+	24	1	14	14	5	2	35	PROBLEMATIC_BW	14	11	18	43	60	21	20
263	22	Female	1.7	60	20.7612	Fidanzato/a	Diploma	13	Studente/ssa	1	Genitori	1	0	4	2	Sera (18:00-00:00)	Si, solo a cena	No	Si	4	Raramente	Raramente	Thriller, Avventura, Anime, Fantascientifiche, Medical Drama, Crime	Chicago fire, Chicago pd, the flash, Arrow, grey's anatomy, the resident.	Streaming on-line	Si	Solo	Sera (18:00-00:00)	No	Sempre	Sempre	Sempre	6	4	3	2	13	15	7	0	35	PROBLEMATIC_BW	7	6	12	25	41	7	49
264	22	Female	1.63	65	24.4646	Single	Diploma	13	Studente/ssa	0	Appartamento Condiviso	0	2	18	1	Sera (18:00-00:00)	Si, solo a cena	No	Si	3 ore	Raramente	Raramente	Thriller, Avventura, Fantascientifiche, Crime	Game of thrones, Sherlock Holmes, vikings, black mirror, prison break, penny dreadful	Streaming on-line	No	Solo	Notte (00:00-6:00)	No	Sempre	Sempre	Mai	4	5	4 ore	2	12	12	5	7	36	PROBLEMATIC_BW	10	7	10	27	45	13	51
265	22	Female	1.62	50	19.052	Single	Diploma	13	Disoccupato/a	0	Genitori	0	12	2	2	Pomeriggio (13:00-18:00)	Si, in entrambi i pasti	No	Si	3 ore	Qualche volta	Raramente	Thriller, Drama, Commedia, Medical Drama	Grey's Anatomy; Doctor Who; La casa de Papel; Lucifer	Piattaforme On-Demand (Sky Online, Infinity, Netflix, Mediaset Premium, NowTV, TimVision), Streaming on-line	Si	Solo	Sera (18:00-00:00)	No	Sempre	Sempre	Qualche Volta	5	5	5 ore	5	22	10	5	0	37	PROBLEMATIC_BW	25	11	21	57	58	19	42
266	22	Female	1.63	59	22.2063	Fidanzato/a	Diploma	16	Studente/ssa	0	Genitori	3	2	10	4	Pomeriggio (13:00-18:00), Sera (18:00-00:00)	Si, in entrambi i pasti	Si	Si	3	Spesso	Spesso	Thriller, Commedia, Crime	Orange is the new black; law and order; coldcase; person of interest; malcom; Rizzoli and Isles.	Televisore, Streaming on-line	No	Solo	Mattina (6:00-13:00), Pomeriggio (13:00-18:00)	Si, solo a pranzo	Spesso	Spesso	Quasi Mai	4	5	6	4	13	16	0	9	38	PROBLEMATIC_BW	29	18	24	71	52	17	63
267	22	Female	1.71	62	21.2031	Fidanzato/a	Laurea Triennale	17	Studente/ssa	1	Genitori	2	10	2	1	Sera (18:00-00:00)	No	Si	Si	3	Mai	Raramente	Thriller, Drama, Commedia, Crime, Fantasy	Jane the Virgin, grimm, desperate housewives, once upon a time, modern family, elementary, the 100	Streaming on-line	No	Sola E con il partner	Sera (18:00-00:00)	No	Spesso	Spesso	Mai	5	3	2	4	21	10	0	7	38	PROBLEMATIC_BW	11	10	21	42	48	8	68
268	22	Female	1.67	68	24.3824	Single	Laurea Triennale	20	Studente/ssa	0	Appartamento Condiviso	1	10	4	4	Sera (18:00-00:00)	Si, solo a cena	No	Si	Tre/quattro ore	Spesso	Spesso	Avventura, Commedia, Anime, Fantascientifiche, Crime	New Girl, NCIS, Sherlock, Doctor Who...	Televisore, Streaming on-line, DVD	No	Con amici	Pomeriggio (13:00-18:00)	Si, in entrambi i pasti	Spesso	Spesso	Qualche Volta	5	5	Tre/quattro	4	18	11	4	6	39	PROBLEMATIC_BW	10	7	16	33	41	10	68
269	22	Female	1.58	70	28.0404	Single	Laurea Magistrale	18	Studente/ssa	1	Genitori	4	4		2	Sera (18:00-00:00)	Si, solo a cena	No	Si	2/3 ore	Raramente	Mai	Avventura, Biografiche	Grey’s anatomy Game of thrones Oretta little lyars	Televisore, Piattaforme On-Demand (Sky Online, Infinity, Netflix, Mediaset Premium, NowTV, TimVision), Telefono	Si	Con la famiglia	Sera (18:00-00:00), Notte (00:00-6:00)	No	Sempre	Sempre	Spesso	5	5	3/4 ore	4	21	8	11	0	40	PROBLEMATIC_BW	10	9	13	32	42	2	17
270	22	Female	1.68	79	27.9904	Fidanzato/a	Diploma	13	Studente/ssa	1	Genitori	1	2		3	Pomeriggio (13:00-18:00), Sera (18:00-00:00)	Si, in entrambi i pasti	No	Si	3 ore	Qualche volta	Raramente	Thriller, Commedia	13, The OC, TBBT	Piattaforme On-Demand (Sky Online, Infinity, Netflix, Mediaset Premium, NowTV, TimVision)	Si	Solo	Pomeriggio (13:00-18:00), Sera (18:00-00:00), Notte (00:00-6:00)	No	Spesso	Sempre	Quasi Mai	4	5	3	7	18	10	8	4	40	PROBLEMATIC_BW	10	6	15	31	36	7	46
271	22	Female	1.57	60	24.3418	Single	Diploma	13	Studente/ssa	1	Genitori	0	10	20	3	Sera (18:00-00:00)	Si, solo a cena	Si	Si	3	Raramente	Qualche volta	Dipende dal momento, guardo un po' tutto	Friends, game of thrones, scrubs	Piattaforme On-Demand (Sky Online, Infinity, Netflix, Mediaset Premium, NowTV, TimVision), Streaming on-line	Si	Mio fratello	Notte (00:00-6:00)	No	Sempre	Sempre	Sempre	5	6	2	3	19	11	10	0	40	PROBLEMATIC_BW	11	16	13	40	50	0	77
272	22	Female	1.7	75	25.9516	Single	Diploma	13	Lavoro Fisico	1	Genitori	1	2	2	1	Sera (18:00-00:00)	Si, solo a cena	Si	Si	5/6 ore	Qualche volta	Qualche volta	Thriller, Drama, Commedia, Fantascientifiche, Medical Drama, Crime	Grey's Anatomy, Criminal Minds, New Girl	Piattaforme On-Demand (Sky Online, Infinity, Netflix, Mediaset Premium, NowTV, TimVision), Streaming on-line	Si	Solo	Sera (18:00-00:00), Notte (00:00-6:00)	No	Sempre	Sempre	Qualche Volta	2	3	4	3	22	10	6	4	42	PROBLEMATIC_BW	24	15	22	61	57	17	53
273	22	Female	1.65	60	22.0386	Fidanzato/a	Diploma	13	Studente/ssa	1	Genitori	3	5	3	0.5	Mattina (6:00-13:00), Sera (18:00-00:00)	Si, in entrambi i pasti	Si	Si	6	Mai	Mai	Drama, Avventura, Commedia, Fantascientifiche, Crime	Sense8, modern family, daredavil	Piattaforme On-Demand (Sky Online, Infinity, Netflix, Mediaset Premium, NowTV, TimVision)	Si	Solo	Mattina (6:00-13:00), Sera (18:00-00:00)	No	Spesso	Sempre	Qualche Volta	7	4	3	5	16	13	6	7	42	PROBLEMATIC_BW	21	12	19	52	58	18	55
274	22	Female	1.65	52	19.1001	Fidanzato/a	Diploma	13	Lavoro Fisico	1	Genitori	2	2	5	0	Sera (18:00-00:00)	No	No	Si	5 ore	Spesso	Spesso	Drama, Avventura, Commedia, Anime	Supernatural, grey’s anatomy, how I met your mother	Piattaforme On-Demand (Sky Online, Infinity, Netflix, Mediaset Premium, NowTV, TimVision), Streaming on-line	Si	Solo	Sera (18:00-00:00)	Si, in entrambi i pasti	Sempre	Sempre	Qualche Volta	5	5	6	4	27	10	8	0	45	PROBLEMATIC_BW	10	11	20	41	48	7	62
275	22	Female	1.6	55	21.4844	Single	Laurea Triennale	16	Studente/ssa	0	Genitori	1	2	24	2	Pomeriggio (13:00-18:00), Sera (18:00-00:00)	Si, in entrambi i pasti	No	Si	5-6	Spesso	Spesso	Thriller, Drama, Commedia, Documentaristiche, Fantascientifiche, Medical Drama, Crime, Musical, Serie Animate	Grey’s anatomy, criminal minds, modern family	Piattaforme On-Demand (Sky Online, Infinity, Netflix, Mediaset Premium, NowTV, TimVision), Streaming on-line, DVD	Si	Solo	Mattina (6:00-13:00), Pomeriggio (13:00-18:00), Sera (18:00-00:00), Notte (00:00-6:00)	Si, in entrambi i pasti	Spesso	Spesso	Spesso	7	4	6	7	24	9	7	6	46	PROBLEMATIC_BW	21	20	20	61	62	30	81
276	22	Female	1.54	56	23.6128	Single	Laurea Triennale	17	Studente/ssa	0	Appartamento Condiviso	0	2	70	2	Sera (18:00-00:00), Notte (00:00-6:00)	No	No	Si	5 ore	Sempre	Sempre	Drama, Avventura, Commedia, Biografiche, Medical Drama, Crime	New girl, Bones, Younger, Ncis, Elementary	Streaming on-line	Si	Solo	Sera (18:00-00:00), Notte (00:00-6:00)	Si, in entrambi i pasti	Sempre	Sempre	Sempre	4	10+	10	4	21	13	8	5	47	PROBLEMATIC_BW	13	8	16	37	33	1	36
277	22	Female	1.72	115	38.8724	Single	Diploma	13	Studente/ssa	0	Genitori	3	35	10	3	Sera (18:00-00:00)	Si, in entrambi i pasti	No	Si	2	Mai	Mai	Thriller, Drama, Commedia, Biografiche, Horror, Medical Drama, Crime	Teen Wolf, New Girl e How to get away with murder	Piattaforme On-Demand (Sky Online, Infinity, Netflix, Mediaset Premium, NowTV, TimVision), Streaming on-line	Si	Solo	Pomeriggio (13:00-18:00)	Si, in entrambi i pasti	Sempre	Sempre	Quasi Mai	5	3	2.5	4	22	11	10	6	49	PROBLEMATIC_BW	7	5	10	22	47	9	37
278	22	Female	1.63	65	24.4646	Single	Diploma	13	Disoccupato/a	1	Genitori	1	4	10	3	Mattina (6:00-13:00), Sera (18:00-00:00)	Si, in entrambi i pasti	No	Si	2	Raramente	Mai	Drama, Avventura, Commedia, Serie Animate	N.C.I.S.; Orange us the new black; Wentworth; Everything sucks; The end of the F***ing world; La casa di carta	Televisore, Streaming on-line	No	Solo	Pomeriggio (13:00-18:00), Sera (18:00-00:00)	No	Sempre	Sempre	Quasi Mai	3	3	3	3	26	8	5	10	49	PROBLEMATIC_BW	15	12	25	52	47	11	83
279	22	Female	1.61	66	25.462	Fidanzato/a	Diploma	13	Lavoro Intellettuale	1	Genitori	2	3	6	1	Pomeriggio (13:00-18:00), Sera (18:00-00:00)	Si, solo a cena	Si	Si	3/4	Spesso	Qualche volta	Thriller, Drama, Commedia, Biografiche	Friends, Squadra antimafia	Piattaforme On-Demand (Sky Online, Infinity, Netflix, Mediaset Premium, NowTV, TimVision)	Si	Solo	Mattina (6:00-13:00), Pomeriggio (13:00-18:00), Sera (18:00-00:00)	Si, in entrambi i pasti	Spesso	Sempre	Sempre	5	10+	5/6	3	28	9	9	4	50	PROBLEMATIC_BW	27	21	17	65	51	14	84
280	22	Female	1.64	70	26.0262	Single	Diploma	13	Studente/ssa	1	Appartamento Condiviso	2	10	10	0	Sera (18:00-00:00)	No	No	Si	2	Mai	Mai	Thriller, Commedia, Fantascientifiche, Medical Drama, Crime	Grey's Anatomy, Suits, Agents of S.h.i.e.l.d.	Piattaforme On-Demand (Sky Online, Infinity, Netflix, Mediaset Premium, NowTV, TimVision)	Si	Solo	Sera (18:00-00:00)	Si, solo a cena	Spesso	Mai	Qualche Volta	1	5	4	1	22	13	9	6	50	PROBLEMATIC_BW	24	19	18	61	56	12	57
281	22	Female	1.65	65	23.8751	Fidanzato/a	Diploma	13	Studente/ssa	0	Genitori	1	4	6	3	Sera (18:00-00:00)	Si, in entrambi i pasti	No	Si	2	Qualche volta	Raramente	Drama, Commedia, Medical Drama, Crime	Moderno family, Chicago PD, Med e Fire, riverdale	Piattaforme On-Demand (Sky Online, Infinity, Netflix, Mediaset Premium, NowTV, TimVision), Streaming on-line	Si	Solo	Sera (18:00-00:00)	No	Qualche Volta	Qualche Volta	Quasi Mai	5	4	3	1	23	14	7	6	50	PROBLEMATIC_BW	20	9	19	48	51	11	64
282	22	Female	1.7	60	20.7612	Single	Diploma	15	Studente/ssa	0	Genitori	0	6	7	1	Pomeriggio (13:00-18:00), Notte (00:00-6:00)	No	No	Si	Troppo	Qualche volta	Spesso	Thriller, Avventura, Commedia, Anime, Fantascientifiche, Crime, Paranormali	One piece, riverdale, prison break	Piattaforme On-Demand (Sky Online, Infinity, Netflix, Mediaset Premium, NowTV, TimVision)	Si	Solo	Pomeriggio (13:00-18:00), Notte (00:00-6:00)	Si, in entrambi i pasti	Spesso	Spesso	Sempre	7	10+	8	6	22	17	11	1	51	PROBLEMATIC_BW	21	19	16	56	62	35	37
283	22	Female	1.75	61	19.9184	Single	Diploma	13	Studente/ssa	1	Appartamento Condiviso	2	25	50	3	Pomeriggio (13:00-18:00)	Si, solo a pranzo	Si	Si	6 ores	Spesso	Sempre	Fantascientifiche	Supernatural, Once Upon A Time, Grey’s Anatomy	Piattaforme On-Demand (Sky Online, Infinity, Netflix, Mediaset Premium, NowTV, TimVision)	Si	Solo	Notte (00:00-6:00)	Si, solo a cena	Sempre	Sempre	Sempre	7	10+	6	7	19	16	8	8	51	PROBLEMATIC_BW	12	9	8	29	43	8	10
284	22	Female	1.66	58	21.048	Single	Laurea Triennale	15	Studente/ssa	1	Appartamento Condiviso	5	2	7	1	Sera (18:00-00:00)	Si, in entrambi i pasti	No	Si	Almeno un paio di ore	Spesso	Spesso	Thriller, Drama, Fantascientifiche, Crime	Le regole del delitto perfetto, this is us, Mr robot	Televisore, Piattaforme On-Demand (Sky Online, Infinity, Netflix, Mediaset Premium, NowTV, TimVision)	Si	Solo	Sera (18:00-00:00)	Si, in entrambi i pasti	Sempre	Sempre	Qualche Volta	4	7	3	4	21	13	9	8	51	PROBLEMATIC_BW	25	21	12	58	63	21	49
285	22	Female	1.65	56	20.5693	Fidanzato/a	Diploma	16	Studente/ssa	1	Con i miei ma anche con delle coinquiline perché sono uno studente fuori sede	0	0	30	21	Pomeriggio (13:00-18:00), Sera (18:00-00:00), Notte (00:00-6:00)	Si, in entrambi i pasti	Si	Si	Parecchio quando non ho esami	Qualche volta	Qualche volta	Thriller, Drama, Avventura, Commedia, Fantascientifiche, Medical Drama, Crime, Musical, Serie Animate	New Girl, Modern Family, Game of Thrones, Vampire Diaries, The Originals, the big bang theory (comunque è una domanda inutile perché prima o poi finiscono tutte, tranne Beautiful)	Televisore, Piattaforme On-Demand (Sky Online, Infinity, Netflix, Mediaset Premium, NowTV, TimVision), Streaming on-line	Si	con tutti tranne che con il partner	Pomeriggio (13:00-18:00), Sera (18:00-00:00), Notte (00:00-6:00)	Si, in entrambi i pasti	Sempre	Sempre	Quasi Mai	4	10+	12	4	24	13	7	7	51	PROBLEMATIC_BW	10	8	15	33	51	8	42
286	23	Female	1.7	50	17.301	Fidanzato/a	Laurea Triennale	16	Studente/ssa	1	Genitori	2	20	20	3	Sera (18:00-00:00)	Si, solo a cena	No	Si	30 min	Mai	Mai	Thriller, Avventura	The exorcist	Televisore	No	Con il partner	Sera (18:00-00:00)	No	Spesso	Quasi Mai	Mai	1	2	2 ore	1	2	2	0	0	4	PROBLEMATIC_BW	11	7	24	42	43	8	37
287	23	Female	1.69	70	24.5089	Fidanzato/a	Diploma	14	Studente/ssa	1	Genitori	1	0	10	2	Sera (18:00-00:00)	Si, in entrambi i pasti	No	Si	1 ora	Mai	Mai	Commedia	The walking dead	Televisore	No	Solo	Mattina (6:00-13:00)	No	Quasi Mai	Mai	Mai	1	3	3 ore	1	3	0	2	0	5	PROBLEMATIC_BW	31	24	22	77	55	10	7
288	23	Female	1.67	48	17.2111	Fidanzato/a	Laurea Triennale	17	Studente/ssa	1	Genitori	1	5	10	1	Sera (18:00-00:00)	Si, in entrambi i pasti	No	Si	1	Qualche volta	Qualche volta	Fantascientifiche, Medical Drama	Greys anatomy game or Thrones	Piattaforme On-Demand (Sky Online, Infinity, Netflix, Mediaset Premium, NowTV, TimVision), Streaming on-line	No	Con il partner	Sera (18:00-00:00)	No	Qualche Volta	Qualche Volta	Mai	2	2	2	1	3	2	0	0	5	PROBLEMATIC_BW	13	6	14	33	47	5	37
289	23	Female	1.68	55	19.487	Fidanzato/a	Laurea Triennale	16	Studente/ssa	1	Genitori	0	7	2	1	Mattina (6:00-13:00), Sera (18:00-00:00)	Si, in entrambi i pasti	Si	Si	2 o 3 ore	Raramente	Raramente	Avventura, Storiche	Vikings, Game of Thrones, How I met your mother	Piattaforme On-Demand (Sky Online, Infinity, Netflix, Mediaset Premium, NowTV, TimVision)	Si	Con il partner	Notte (00:00-6:00)	No	Mai	Mai	Quasi Mai	3	4	2 ore e mezza circa	2	4	4	1	0	9	PROBLEMATIC_BW	17	15	18	50	56	20	28
290	23	Female	1.65	50	18.3655	Fidanzato/a	Laurea Triennale	16	Studente/ssa	0	Appartamento Condiviso	0	3	20	1	Sera (18:00-00:00)	Si, in entrambi i pasti	No	Si	3	Raramente	Raramente	Avventura, Crime	Lei to me, Abele, ahdle he	Televisore, Streaming on-line	No	Con amici	Notte (00:00-6:00)	No	Quasi Mai	Quasi Mai	Quasi Mai	2	3	3	2	3	6	2	0	11	PROBLEMATIC_BW	13	7	22	42	34	0	0
291	23	Female	1.61	70	27.0051	Single	Laurea Triennale	16	Studente/ssa	1	Appartamento Condiviso	4	8	12	0	Sera (18:00-00:00)	No	No	Si	un paio d'ore	Mai	Raramente	Drama, Avventura, Anime, Fantascientifiche, Serie Animate	Doctor who, Sherlock, Victoria, Star Trek	Piattaforme On-Demand (Sky Online, Infinity, Netflix, Mediaset Premium, NowTV, TimVision), Streaming on-line	Si	Solo	Sera (18:00-00:00), Notte (00:00-6:00)	Si, solo a cena	Sempre	Sempre	Mai	3	6	2	1	3	5	4	0	12	PROBLEMATIC_BW	7	6	11	24	39	5	10
292	23	Female	1.6	50	19.5312	Single	Laurea Triennale	18	Studente/ssa	1	Genitori	1	5	10	1	Pomeriggio (13:00-18:00), Sera (18:00-00:00)	Si, in entrambi i pasti	No	Si	1	Qualche volta	Qualche volta	Commedia, Fantascientifiche, Crime	Grey's anatomy, il trono di spade, criminal minds, the big bang theory	Streaming on-line	No	Solo	Pomeriggio (13:00-18:00), Sera (18:00-00:00)	Si, in entrambi i pasti	Spesso	Spesso	Qualche Volta	2	3	2	3	6	5	2	0	13	PROBLEMATIC_BW	16	9	8	33	40	7	22
293	23	Female	1.64	57	21.1927	Single	Laurea Triennale	16	Lavoro Intellettuale	1	Genitori	2	6	28	3	Pomeriggio (13:00-18:00)	Si, in entrambi i pasti	No	Si	1	Raramente	Mai	Drama, Anime, Medical Drama	Attacco dei giganti, Ajin, Orange is the New Black	Streaming on-line	No	Solo	Sera (18:00-00:00)	No	Spesso	Quasi Mai	Mai	3	3	3	2	7	4	2	0	13	PROBLEMATIC_BW	7	9	14	30	38	2	15
294	23	Female	1.57	75	30.4272	Single	Laurea Triennale	17	Studente/ssa	0	Coinquiline	4	30	4	2	Sera (18:00-00:00)	No	Si	Si	1h	Raramente	Raramente	Thriller, Commedia, Crime	Gomorra	Streaming on-line	No	Con amici	Pomeriggio (13:00-18:00), Sera (18:00-00:00)	No	Mai	Spesso	Quasi Mai	1	2	2	1	5	4	2	2	13	PROBLEMATIC_BW	7	9	24	40	41	0	0
295	23	Female	1.64	57	21.1927	Fidanzato/a	Laurea Triennale	18	Studente/ssa	1	Solo	2	5	5	2	Sera (18:00-00:00)	No	No	Si	poco	Raramente	Raramente	Thriller, Commedia, Crime	Dexter, Breaking Bad, Black Mirror	Televisore, Piattaforme On-Demand (Sky Online, Infinity, Netflix, Mediaset Premium, NowTV, TimVision)	Si	Solo	Sera (18:00-00:00)	No	Mai	Mai	Mai	1	3	4	1	11	5	1	0	17	PROBLEMATIC_BW	16	5	10	31	39	6	39
296	23	Female	1.73	63	21.0498	Single	Diploma	13	Studente/ssa	1	Appartamento Condiviso	3	8	25	0	Pomeriggio (13:00-18:00)	No	Si	Si	Un'ora	Mai	Mai	Thriller, Biografiche, Documentaristiche, Medical Drama, Crime, Serie Animate	Grey's anatomy, the mentalist, rick and morty	Piattaforme On-Demand (Sky Online, Infinity, Netflix, Mediaset Premium, NowTV, TimVision), Streaming on-line	Si	Con amici	Pomeriggio (13:00-18:00), Notte (00:00-6:00)	No	Qualche Volta	Mai	Mai	1	2	1	1	7	6	3	2	18	PROBLEMATIC_BW	17	22	13	52	41	7	39
297	23	Female	1.72	58	19.6052	Fidanzato/a	Diploma	16	Studente/ssa	1	Genitori	1	5	5	3	Sera (18:00-00:00)	Si, solo a cena	Si	Si	3	Qualche volta	Qualche volta	Drama, Medical Drama, Crime	Grey's anatomy, Blindspot, The Vampire Diaries	Piattaforme On-Demand (Sky Online, Infinity, Netflix, Mediaset Premium, NowTV, TimVision), Streaming on-line	Si	Solo	Mattina (6:00-13:00), Sera (18:00-00:00)	Si, solo a pranzo	Quasi Mai	Quasi Mai	Sempre	2	5	4	3	5	10	4	0	19	PROBLEMATIC_BW	15	5	19	39	35	6	11
298	23	Female	1.66	52	18.8707	Fidanzato/a	Diploma	19	Studente/ssa	0	Genitori	1	2	1	3	Sera (18:00-00:00)	Si, in entrambi i pasti	No	Si	2	Qualche volta	Qualche volta	Commedia, Crime	Il trono di spade,greys anatomy,criminal minds	Televisore	No	Con la famiglia	Sera (18:00-00:00)	Si, solo a cena	Qualche Volta	Mai	Mai	1	4	5	1	13	7	0	1	21	PROBLEMATIC_BW	12	10	10	32	38	2	52
299	23	Female	1.68	56	19.8413	Fidanzato/a	Laurea Triennale	17	Studente/ssa	1	Appartamento Condiviso	2	7	3	2	Sera (18:00-00:00)	Si, solo a cena	No	Si	3 ore	Qualche volta	Qualche volta	Drama, Commedia, Crime	Brooklyn 99, The Sharp Objects, Riverdale	Piattaforme On-Demand (Sky Online, Infinity, Netflix, Mediaset Premium, NowTV, TimVision)	Si	Con amici	Pomeriggio (13:00-18:00), Sera (18:00-00:00)	Si, in entrambi i pasti	Qualche Volta	Qualche Volta	Mai	4	4	3 ore e mezza	4	9	6	6	0	21	PROBLEMATIC_BW	13	7	12	32	37	4	41
300	23	Female	1.6	60	23.4375	Fidanzato/a	Laurea Triennale	13	Studente/ssa	1	Appartamento Condiviso	6	10	5	1.5	Pomeriggio (13:00-18:00), Sera (18:00-00:00)	No	No	Si	1 ora e mezza circa	Raramente	Raramente	Thriller, Drama, Avventura, Biografiche, Serie Animate	Trono di Spade, Casa di Carta, Suburra	Piattaforme On-Demand (Sky Online, Infinity, Netflix, Mediaset Premium, NowTV, TimVision), Streaming on-line	Si	Solo	Pomeriggio (13:00-18:00), Sera (18:00-00:00)	Si, solo a pranzo	Sempre	Sempre	Quasi Mai	2	6	4 circa	2	7	9	6	0	22	PROBLEMATIC_BW	9	7	16	32	33	0	12
301	23	Female	1.55	65	27.0552	Single	Laurea Triennale	16	Studente/ssa	1	Genitori	1	10	10	0	Sera (18:00-00:00)	Si, in entrambi i pasti	No	Si	2 ore	Raramente	Raramente	Thriller, Drama, Commedia, Horror, Crime	Friends, How to get away with murder, Penny Dreadful	Piattaforme On-Demand (Sky Online, Infinity, Netflix, Mediaset Premium, NowTV, TimVision)	Si	Solo	Sera (18:00-00:00)	No	Sempre	Spesso	Mai	6	9	8	3	10	5	7	0	22	PROBLEMATIC_BW	7	6	15	28	51	2	57
302	23	Female	1.79	58	18.1018	Single	Dottorato o Specializzazione	13	Studente/ssa	1	Solo	2	40	25	3	Sera (18:00-00:00), Notte (00:00-6:00)	Si, solo a cena	No	Si	2	Qualche volta	Qualche volta	Thriller, Drama, Commedia, Crime, Musical	Shameless, game of thrones, orange is the new black	Piattaforme On-Demand (Sky Online, Infinity, Netflix, Mediaset Premium, NowTV, TimVision)	Si	Solo	Sera (18:00-00:00), Notte (00:00-6:00)	Si, in entrambi i pasti	Spesso	Spesso	Qualche Volta	3	8	4/5	3	9	9	6	0	24	PROBLEMATIC_BW	9	11	22	42	46	0	24
303	23	Female	1.67	52	18.6453	Single	Laurea Triennale	18	Studente/ssa	0	Appartamento Condiviso	0	4	6	0	Sera (18:00-00:00)	No	No	Si	1-2 h	Mai	Mai	Drama, Commedia, Biografiche, Fantascientifiche	Star Trek, Atypical, how I met your mother	Piattaforme On-Demand (Sky Online, Infinity, Netflix, Mediaset Premium, NowTV, TimVision)	Si	Solo	Sera (18:00-00:00)	No	Spesso	Spesso	Mai	1	2	2h	1	15	6	3	0	24	PROBLEMATIC_BW	15	16	16	47	41	3	37
304	23	Female	1.6	55	21.4844	Single	Laurea Triennale	16	Lavoro Intellettuale	1	Genitori	1	10	10	0.5	Pomeriggio (13:00-18:00), Sera (18:00-00:00)	Si, in entrambi i pasti	Si	Si	Dipende	Qualche volta	Qualche volta	Avventura, Documentaristiche, Medical Drama, Musical	Supernatural, agents of shield, big bang theory	Televisore	No	Con la famiglia	Pomeriggio (13:00-18:00), Sera (18:00-00:00)	Si, in entrambi i pasti	Qualche Volta	Qualche Volta	Spesso	2	5	2	1	16	2	3	3	24	PROBLEMATIC_BW	19	13	22	54	43	0	11
305	23	Female	1.62	70	26.6728	Fidanzato/a	Diploma	13	Studente/ssa	0	Genitori	1	4	8	1	Pomeriggio (13:00-18:00), Sera (18:00-00:00)	Si, in entrambi i pasti	No	Si	4 ore	Qualche volta	Raramente	Thriller, Drama, Commedia, Biografiche, Medical Drama, Crime	Grey's Anatomy Revenge How to get away with a murderer Once upon a time	Televisore, Piattaforme On-Demand (Sky Online, Infinity, Netflix, Mediaset Premium, NowTV, TimVision), Streaming on-line	Si	Solo	Pomeriggio (13:00-18:00), Sera (18:00-00:00), Notte (00:00-6:00)	No	Sempre	Sempre	Mai	3	6	4	2	8	11	6	0	25	PROBLEMATIC_BW	10	8	15	33	49	9	41
306	23	Female	1.78	64	20.1995	Fidanzato/a	Diploma	18	Studente/ssa	1	Genitori	1	0	8	2	Sera (18:00-00:00)	Si, solo a pranzo	Si	Si	2	Qualche volta	Qualche volta	Medical Drama, Crime	Grey’s anatomy, Criminal Minds , NCIS	Televisore, Piattaforme On-Demand (Sky Online, Infinity, Netflix, Mediaset Premium, NowTV, TimVision)	Si	Con la famiglia	Sera (18:00-00:00)	Si, solo a pranzo	Spesso	Quasi Mai	Sempre	2	3	3	1	8	8	7	2	25	PROBLEMATIC_BW	11	11	17	39	36	8	79
307	23	Female	1.74	70	23.1206	Fidanzato/a	Laurea Triennale	18	Studente/ssa	1	Solo	1	30	40	1	Sera (18:00-00:00)	No	Si	Si	2	Raramente	Raramente	Thriller, Medical Drama, Crime	Grey’s anatomy, castle, HTGAWM	Piattaforme On-Demand (Sky Online, Infinity, Netflix, Mediaset Premium, NowTV, TimVision), Streaming on-line	Si	Solo	Pomeriggio (13:00-18:00), Sera (18:00-00:00)	No	Spesso	Mai	Quasi Mai	1	10+	6	1	13	9	1	2	25	PROBLEMATIC_BW	16	15	20	51	46	8	31
308	23	Female	1.6	54	21.0937	Single	Diploma	13	Studente/ssa	0	Genitori	2	5		2	Mattina (6:00-13:00), Pomeriggio (13:00-18:00)	Si, in entrambi i pasti	Si	Si	2	Qualche volta	Mai	Thriller, Avventura, Crime, Serie Animate	Strange Thinks, Ranch,Lie to me .	Piattaforme On-Demand (Sky Online, Infinity, Netflix, Mediaset Premium, NowTV, TimVision), Streaming on-line	Si	Solo	Sera (18:00-00:00)	No	Sempre	Sempre	Mai	7	4	3	4	14	4	8	0	26	PROBLEMATIC_BW	7	12	12	31	27	6	18
309	23	Female	1.63	52	19.5717	Single	Laurea Triennale	19	Studente/ssa	0	Appartamento Condiviso	2	8	6	1	Sera (18:00-00:00)	No	No	Si	2	Mai	Qualche volta	Drama, Medical Drama	"This is us" " Black mirror" "Grey's anatomy"	Streaming on-line	No	Solo	Sera (18:00-00:00)	Si, in entrambi i pasti	Spesso	Spesso	Mai	2	2	2 ore	1	9	9	5	4	27	PROBLEMATIC_BW	13	15	10	38	64	31	81
310	23	Female	1.67	58	20.7967	Fidanzato/a	Laurea Triennale	16	Disoccupato/a	1	Genitori	3	14	5	2	Pomeriggio (13:00-18:00)	Si, in entrambi i pasti	No	Si	4	Raramente	Raramente	Drama, Commedia, Anime, Fantascientifiche, Medical Drama, Crime	New girl, Shadowhunter, Chicago med, Supergirl	Piattaforme On-Demand (Sky Online, Infinity, Netflix, Mediaset Premium, NowTV, TimVision), Streaming on-line	Si	Solo	Sera (18:00-00:00), Notte (00:00-6:00)	No	Spesso	Sempre	Quasi Mai	3	6	4	1	15	5	8	0	28	PROBLEMATIC_BW	10	6	17	33	33	1	13
311	23	Female	1.7	55	19.0311	Fidanzato/a	Laurea Triennale	18	Studente/ssa	1	Genitori	0	1	1	3	Sera (18:00-00:00)	Si, in entrambi i pasti	No	Si	3 ore	Qualche volta	Qualche volta	Thriller, Avventura, Medical Drama, Crime, Serie Animate	Scrubs - Castle - How I met your mother	Streaming on-line	No	Solo	Sera (18:00-00:00)	No	Qualche Volta	Sempre	Mai	3	4	3 ore	1	18	7	3	0	28	PROBLEMATIC_BW	14	11	15	40	47	6	49
312	23	Female	1.7	55	19.0311	Fidanzato/a	Laurea Triennale	17	Studente/ssa	0	Genitori	1	3	5	1	Sera (18:00-00:00)	Si, solo a cena	Si	Si	1	Raramente	Raramente	Drama, Medical Drama	Shameless. Game of Thrones. Stranger things	Piattaforme On-Demand (Sky Online, Infinity, Netflix, Mediaset Premium, NowTV, TimVision), Streaming on-line	Si	Solo	Sera (18:00-00:00), Notte (00:00-6:00)	No	Spesso	Spesso	Qualche Volta	3	3	3	2	11	9	5	4	29	PROBLEMATIC_BW	14	8	12	34	47	8	24
313	23	Female	1.65	65	23.8751	Single	Laurea Triennale	16	Studente/ssa	0	Appartamento Condiviso	2	8		1	Sera (18:00-00:00)	No	Si	Si	Non quanto vorrei	Raramente	Raramente	Fantascientifiche, Medical Drama, Crime	Grey's anatomy Orphan black Game of thrones	Piattaforme On-Demand (Sky Online, Infinity, Netflix, Mediaset Premium, NowTV, TimVision), Streaming on-line	Si	Solo	Sera (18:00-00:00)	Si, solo a cena	Sempre	Qualche Volta	Qualche Volta	2	7	4 ore e mezza	2	12	8	9	0	29	PROBLEMATIC_BW	24	22	19	65	52	13	45
314	23	Female	1.65	54	19.8347	Single	Diploma	15	Studente/ssa	1	Genitori	1	2	3	0	Pomeriggio (13:00-18:00), Notte (00:00-6:00)	Si, in entrambi i pasti	No	Si	2 ore	Spesso	Spesso	Drama, Avventura, Commedia, Fantascientifiche, Horror	Narcos, Once upon a time,The walking dead	Pc	Si	Solo	Sera (18:00-00:00)	Si, solo a pranzo	Spesso	Spesso	Qualche Volta	3	3	3/4 ore	2	14	4	8	3	29	PROBLEMATIC_BW	25	14	11	50	51	11	10
315	23	Female	1.7	60	20.7612	Fidanzato/a	Diploma	13	Studente/ssa	1	Coniuge (o fidanzato/a)	3	3	10	0	Sera (18:00-00:00)	No	No	Si	Dipende dai momenti	Qualche volta	Qualche volta	Thriller, Drama, Commedia, Medical Drama	Dr house, sex and the city, how i met your mother	Piattaforme On-Demand (Sky Online, Infinity, Netflix, Mediaset Premium, NowTV, TimVision), Streaming on-line	Si	Con il partner	Sera (18:00-00:00)	Si, in entrambi i pasti	Spesso	Qualche Volta	Spesso	3	3	3	2	16	7	7	0	30	PROBLEMATIC_BW	11	12	20	43	43	8	48
316	23	Female	1.6	45	17.5781	Single	Laurea Triennale	16	Studente/ssa	1	Genitori	3	8	24	1	Sera (18:00-00:00)	No	No	Si	2	Mai	Mai	Thriller, Drama, Fantascientifiche, Horror, Crime	parks and recreations / black mirror / Game of Thrones / stranger things / Westworld / thirteen reason why	Piattaforme On-Demand (Sky Online, Infinity, Netflix, Mediaset Premium, NowTV, TimVision)	Si	Con la famiglia	Sera (18:00-00:00), Notte (00:00-6:00)	No	Qualche Volta	Qualche Volta	Mai	5	2	2	3	16	5	5	4	30	PROBLEMATIC_BW	22	14	15	51	61	31	30
317	23	Female	1.65	77	28.2828	Single	Laurea Triennale	18	Lavoro Intellettuale	1	Genitori	1	5	10	3	Pomeriggio (13:00-18:00), Sera (18:00-00:00)	Si, in entrambi i pasti	Si	Si	2	Qualche volta	Raramente	Thriller, Medical Drama, Crime	Grey’s anatomy - Private practice - Criminal minds	Streaming on-line	No	Solo	Sera (18:00-00:00)	Si, solo a pranzo	Spesso	Spesso	Qualche Volta	5	2	2	5	22	6	1	1	30	PROBLEMATIC_BW	20	14	17	51	45	6	43
318	23	Female	1.65	60	22.0386	Single	Diploma	13	Studente/ssa	0	Appartamento Condiviso	1	4	10	1.5	Sera (18:00-00:00)	Si, solo a cena	Si	Si	3 o 4 ore	Qualche volta	Raramente	Drama, Fantascientifiche, Medical Drama, Crime, Musical	The flash shadowhunter supergirl	Piattaforme On-Demand (Sky Online, Infinity, Netflix, Mediaset Premium, NowTV, TimVision), Streaming on-line	Si	Solo	Sera (18:00-00:00)	Si, solo a cena	Sempre	Spesso	Spesso	1	4	Quasi 5 ore	6	13	8	7	2	30	PROBLEMATIC_BW	12	20	20	52	53	4	40
319	23	Female	1.6	59	23.0469	Single	Diploma	17	Studente/ssa	0	Appartamento Condiviso	2	2	7	1	Sera (18:00-00:00)	No	No	Si	2/3 ore	Raramente	Raramente	Thriller, Drama, Fantascientifiche	Shameless, Peaky blinders, suburra	Streaming on-line	Si	Con amici	Sera (18:00-00:00)	No	Spesso	Sempre	Quasi Mai	1	3	3	1	16	6	5	3	30	PROBLEMATIC_BW	7	9	13	29	45	6	37
320	23	Female	1.56	56	23.0112	Fidanzato/a	Laurea Triennale	16	Studente/ssa	0	Genitori	3	6	5	6	Sera (18:00-00:00), Notte (00:00-6:00)	Si, in entrambi i pasti	Si	Si	1.30 / 2	Raramente	Mai	Thriller, Avventura, Fantascientifiche, Horror, Serie Animate	Game of thrones, vikings, la casa di carta, narcos, dark, outlander...	Piattaforme On-Demand (Sky Online, Infinity, Netflix, Mediaset Premium, NowTV, TimVision), Streaming on-line	Si	Solo	Mattina (6:00-13:00), Sera (18:00-00:00)	No	Qualche Volta	Qualche Volta	Sempre	1	2	3 h	1	16	6	3	5	30	PROBLEMATIC_BW	16	12	16	44	55	17	69
321	23	Female	1.6	60	23.4375	Fidanzato/a	Licenza Media	8	Disoccupato/a	0	Genitori	1	4	2	8	Mattina (6:00-13:00), Sera (18:00-00:00)	Si, in entrambi i pasti	No	Si	2 ore	Spesso	Qualche volta	Thriller, Drama, Avventura, Commedia, Anime, Fantascientifiche, Crime, Serie Animate	Bones, big bang theory, friends	Televisore, Streaming on-line	No	Solo	Mattina (6:00-13:00), Pomeriggio (13:00-18:00), Sera (18:00-00:00)	Si, in entrambi i pasti	Qualche Volta	Qualche Volta	Qualche Volta	3	4	4	1	17	5	7	2	31	PROBLEMATIC_BW	21	15	24	60	62	16	58
322	23	Female	1.7	53	18.3391	Single	Laurea Triennale	16	Studente/ssa	1	Genitori	1	4	8	3	Sera (18:00-00:00)	Si, solo a cena	No	Si	1 ora	Mai	Mai	Thriller, Drama, Fantascientifiche, Crime	HTGAWM, GoT, Mr. Robot	Streaming on-line	No	Solo	Pomeriggio (13:00-18:00)	No	Spesso	Mai	Quasi Mai	1	4	4	3	20	5	7	0	32	PROBLEMATIC_BW	10	5	12	27	38	0	42
323	23	Female	1.7	65	22.4913	Fidanzato/a	Diploma	13	Studente/ssa	0	Appartamento Condiviso	3	20	20	3	Notte (00:00-6:00)	Si, solo a cena	Si	Si	3	Qualche volta	Qualche volta	Thriller, Drama, Horror, Crime	Dark, The path, American horror story	Streaming on-line	No	Solo	Notte (00:00-6:00)	No	Sempre	Sempre	Mai	7	5	6	4	16	13	1	2	32	PROBLEMATIC_BW	24	17	21	62	64	26	83
324	23	Female	1.73	70	23.3887	Single	Laurea Triennale	16	Studente/ssa	0	Appartamento Condiviso	2	6	20	1	Sera (18:00-00:00)	No	Si	Si	2-3	Qualche volta	Qualche volta	Thriller, Drama, Avventura, Commedia, Biografiche, Horror, Crime	The Walking Dead, Boris, American Horror Story	Piattaforme On-Demand (Sky Online, Infinity, Netflix, Mediaset Premium, NowTV, TimVision)	Si	Solo	Sera (18:00-00:00), Notte (00:00-6:00)	No	Spesso	Spesso	Qualche Volta	2	6	6	1	10	9	8	5	32	PROBLEMATIC_BW	23	22	20	65	52	13	36
325	23	Female	1.6	50	19.5312	Single	Laurea Triennale	16	Studente/ssa	1	Appartamento Condiviso	2	21	28	2	Sera (18:00-00:00), Notte (00:00-6:00)	No	No	Si	2	Spesso	Raramente	Biografiche, Documentaristiche, Medical Drama	grey's anatomy, mind hunter, Simpson	Piattaforme On-Demand (Sky Online, Infinity, Netflix, Mediaset Premium, NowTV, TimVision)	Si	Con amici	Sera (18:00-00:00), Notte (00:00-6:00)	No	Mai	Mai	Quasi Mai	3	3	3	2	19	7	8	0	34	PROBLEMATIC_BW	19	19	10	48	47	9	32
326	23	Female	1.6	58	22.6562	Fidanzato/a	Laurea Triennale	16	Studente/ssa	1	Genitori	3	6	3	2	Sera (18:00-00:00)	Si, solo a cena	Si	Si	2	Raramente	Raramente	Thriller, Drama, Commedia, Biografiche, Fantascientifiche, Medical Drama, Crime, Musical	Lost, Breaking Bad, Game of Thrones, The Crown, How i met your mother, Narcos, Stranger Things	Piattaforme On-Demand (Sky Online, Infinity, Netflix, Mediaset Premium, NowTV, TimVision)	Si	Solo	Mattina (6:00-13:00), Sera (18:00-00:00)	No	Sempre	Sempre	Mai	2	3	3	2	15	8	6	5	34	PROBLEMATIC_BW	11	8	10	29	35	11	54
327	23	Female	1.63	75	28.2284	Single	Laurea Triennale	17	Studente/ssa	1	Genitori	2	7	4	1	Sera (18:00-00:00)	No	No	Si	1	Qualche volta	Qualche volta	Drama, Avventura, Commedia, Biografiche, Medical Drama, Musical	Grey's anatomy, Scandal, Modern Family, The big bang theory, Scrubs, How to get away with murder, how I Met your mother	Streaming on-line	No	Solo	Sera (18:00-00:00)	No	Spesso	Qualche Volta	Spesso	4	3	1	4	16	8	9	2	35	PROBLEMATIC_BW	7	5	10	22	33	6	25
328	23	Female	1.75	72	23.5102	Single	Diploma	13	Studente/ssa	1	Appartamento Condiviso	3	7	25	0.5	Sera (18:00-00:00)	Si, solo a cena	No	Si	Dalle 2 alle 5 ore, dipende dagli impegni	Spesso	Qualche volta	Avventura, Commedia, Medical Drama, Musical	Comedy da 20 min, grey's anatomy, serie che guardo al momento	Streaming on-line	Si	Solo	Pomeriggio (13:00-18:00), Sera (18:00-00:00)	No	Sempre	Sempre	Sempre	7	3	3	4	10	13	8	4	35	PROBLEMATIC_BW	14	15	22	51	45	8	39
329	23	Female	1.58	55	22.0317	Fidanzato/a	Laurea Triennale	18	Studente/ssa	0	Appartamento Condiviso	0	15	10	2	Sera (18:00-00:00)	No	No	Si	5	Raramente	Qualche volta	Drama, Avventura, Commedia, Fantascientifiche, Crime	Reign, La Casa De Papel, The Crown	Piattaforme On-Demand (Sky Online, Infinity, Netflix, Mediaset Premium, NowTV, TimVision), Streaming on-line	Si	Solo	Mattina (6:00-13:00), Pomeriggio (13:00-18:00), Sera (18:00-00:00)	Si, solo a cena	Sempre	Sempre	Mai	4	4	3	4	20	4	9	3	36	PROBLEMATIC_BW	18	19	23	60	36	4	26
330	23	Female	1.62	80	30.4832	Single	Laurea Triennale	16	Lavoro Fisico	0	Solo	0	12	18	1	Mattina (6:00-13:00), Notte (00:00-6:00)	Si, in entrambi i pasti	Si	Si	7	Sempre	Sempre	Drama, Avventura, Commedia, Anime, Medical Drama, Musical, Serie Animate, Fantasy	Teen Wolf Modern Family Sword Art Online Queer As Falk	Piattaforme On-Demand (Sky Online, Infinity, Netflix, Mediaset Premium, NowTV, TimVision), Streaming on-line	Si	Solo	Mattina (6:00-13:00), Notte (00:00-6:00)	Si, in entrambi i pasti	Sempre	Sempre	Spesso	6	10+	7	7	24	14	6	7	51	PROBLEMATIC_BW	12	8	16	36	58	18	60
331	22	Male	1.81	68	20.7564	Single	Diploma	13	Studente/ssa	0	Appartamento Condiviso	0	12	30	1	Sera (18:00-00:00)	Si, solo a cena	No	Si	3 ore	Raramente	Qualche volta	Thriller, Commedia	Sense8, Gomorra, Game of Thrones	Piattaforme On-Demand (Sky Online, Infinity, Netflix, Mediaset Premium, NowTV, TimVision)	No	Con amici	Sera (18:00-00:00)	Si, solo a cena	Qualche Volta	Spesso	Mai	2	2	3	1	1	2	0	0	3	PROBLEMATIC_BW	11	18	20	49	38	1	42
332	22	Male	1.81	68	20.7564	Single	Diploma	13	Studente/ssa	0	Appartamento Condiviso	0	12	30	1	Sera (18:00-00:00)	Si, solo a cena	No	Si	3 ore	Raramente	Qualche volta	Thriller, Commedia	Sense8, Gomorra, Game of Thrones	Piattaforme On-Demand (Sky Online, Infinity, Netflix, Mediaset Premium, NowTV, TimVision)	No	Con amici	Sera (18:00-00:00)	Si, solo a cena	Qualche Volta	Spesso	Mai	2	2	3	1	1	2	0	0	3	PROBLEMATIC_BW	11	18	20	49	38	1	42
333	22	Male	1.8	70	21.6049	Single	Diploma	15	Lavoro Fisico	1	Genitori	0	0	20	15	Sera (18:00-00:00)	Si, in entrambi i pasti	No	Si	2/3	Mai	Mai	Commedia, Fantascientifiche, Serie Animate	Last Man standing, Chicago media, Chicago Fire, Chicago PD	Televisore	No	Solo	Sera (18:00-00:00)	Si, solo a cena	Mai	Mai	Mai	2	7	3	1	5	3	1	0	9	PROBLEMATIC_BW	9	6	15	30	28	3	16
334	22	Male	1.8	70	21.6049	Single	Diploma	15	Lavoro Fisico	1	Genitori	0	0	20	15	Sera (18:00-00:00)	Si, in entrambi i pasti	No	Si	2/3	Mai	Mai	Commedia, Fantascientifiche, Serie Animate	Last Man standing, Chicago media, Chicago Fire, Chicago PD	Televisore	No	Solo	Sera (18:00-00:00)	Si, solo a cena	Mai	Mai	Mai	2	7	3	1	5	3	1	0	9	PROBLEMATIC_BW	9	6	15	30	28	3	16
335	22	Male	1.84	83	24.5156	Single	Diploma	18	Studente/ssa	1	Genitori	1	2	14	4	Pomeriggio (13:00-18:00), Sera (18:00-00:00)	Si, in entrambi i pasti	No	Si	2 ore	Raramente	Raramente	Drama, Avventura, Anime, Fantascientifiche, Serie Animate	Game of Thrones, Vikings, Rick & Morty, Shannara	Piattaforme On-Demand (Sky Online, Infinity, Netflix, Mediaset Premium, NowTV, TimVision)	Si	Solo	Notte (00:00-6:00)	No	Qualche Volta	Quasi Mai	Mai	1	4	2:30	2	5	5	5	1	16	PROBLEMATIC_BW	12	14	20	46	37	2	28
336	22	Male	1.84	83	24.5156	Single	Diploma	18	Studente/ssa	1	Genitori	1	2	14	4	Pomeriggio (13:00-18:00), Sera (18:00-00:00)	Si, in entrambi i pasti	No	Si	2 ore	Raramente	Raramente	Drama, Avventura, Anime, Fantascientifiche, Serie Animate	Game of Thrones, Vikings, Rick & Morty, Shannara	Piattaforme On-Demand (Sky Online, Infinity, Netflix, Mediaset Premium, NowTV, TimVision)	Si	Solo	Notte (00:00-6:00)	No	Qualche Volta	Quasi Mai	Mai	1	4	2:30	2	5	5	5	1	16	PROBLEMATIC_BW	12	14	20	46	37	2	28
337	22	Male	1.73	82	27.3982	Single	Diploma	13	Studente/ssa	1	Appartamento Condiviso	1	3	70	2	Sera (18:00-00:00)	Si, solo a pranzo	No	Si	Dipende, massimo un’oretta e mezza	Raramente	Raramente	Thriller, Avventura, Commedia, Fantascientifiche, Serie Animate	Stranger Things, Griffin, mr. robot	Piattaforme On-Demand (Sky Online, Infinity, Netflix, Mediaset Premium, NowTV, TimVision)	Si	Dipende, solo o con amici	Sera (18:00-00:00)	No	Mai	Mai	Quasi Mai	3	8	4 ore	3	8	3	7	0	18	PROBLEMATIC_BW	10	9	16	35	50	3	34
338	22	Male	1.73	82	27.3982	Single	Diploma	13	Studente/ssa	1	Appartamento Condiviso	1	3	70	2	Sera (18:00-00:00)	Si, solo a pranzo	No	Si	Dipende, massimo un’oretta e mezza	Raramente	Raramente	Thriller, Avventura, Commedia, Fantascientifiche, Serie Animate	Stranger Things, Griffin, mr. robot	Piattaforme On-Demand (Sky Online, Infinity, Netflix, Mediaset Premium, NowTV, TimVision)	Si	Dipende, solo o con amici	Sera (18:00-00:00)	No	Mai	Mai	Quasi Mai	3	8	4 ore	3	8	3	7	0	18	PROBLEMATIC_BW	10	9	16	35	50	3	34
339	22	Male	1.83	80	23.8884	Single	Diploma	13	Lavoro Intellettuale	1	Genitori	0	1	5	5	Sera (18:00-00:00)	Si, in entrambi i pasti	No	Si	2/3	Mai	Mai	Avventura	Lost, Prison Break, Breaking Bad	Piattaforme On-Demand (Sky Online, Infinity, Netflix, Mediaset Premium, NowTV, TimVision)	Si	Solo	Pomeriggio (13:00-18:00)	No	Mai	Mai	Mai	5	3	2	5	8	4	5	2	19	PROBLEMATIC_BW	10	15	18	43	37	2	41
340	22	Male	1.83	80	23.8884	Single	Diploma	13	Lavoro Intellettuale	1	Genitori	0	1	5	5	Sera (18:00-00:00)	Si, in entrambi i pasti	No	Si	2/3	Mai	Mai	Avventura	Lost, Prison Break, Breaking Bad	Piattaforme On-Demand (Sky Online, Infinity, Netflix, Mediaset Premium, NowTV, TimVision)	Si	Solo	Pomeriggio (13:00-18:00)	No	Mai	Mai	Mai	5	3	2	5	8	4	5	2	19	PROBLEMATIC_BW	10	15	18	43	37	2	41
341	22	Male	1.77	65	20.7476	Single	Diploma	13	Lavoro Fisico	0	Appartamento Condiviso	0	3	10	5	Sera (18:00-00:00)	No	Si	Si	5	Raramente	Raramente	Thriller, Drama, Avventura, Crime, Western	Sons of anarchy, dexter, peaky blinders	Piattaforme On-Demand (Sky Online, Infinity, Netflix, Mediaset Premium, NowTV, TimVision)	Si	Con amici	Sera (18:00-00:00)	No	Mai	Mai	Mai	3	6	4	3	8	8	5	1	22	PROBLEMATIC_BW	14	10	18	42	37	5	36
342	22	Male	1.77	65	20.7476	Single	Diploma	13	Lavoro Fisico	0	Appartamento Condiviso	0	3	10	5	Sera (18:00-00:00)	No	Si	Si	5	Raramente	Raramente	Thriller, Drama, Avventura, Crime, Western	Sons of anarchy, dexter, peaky blinders	Piattaforme On-Demand (Sky Online, Infinity, Netflix, Mediaset Premium, NowTV, TimVision)	Si	Con amici	Sera (18:00-00:00)	No	Mai	Mai	Mai	3	6	4	3	8	8	5	1	22	PROBLEMATIC_BW	14	10	18	42	37	5	36
343	22	Male	1.77	68	21.7051	Single	Diploma	13	Disoccupato/a	1	Genitori	1	7	2	1	Mattina (6:00-13:00), Sera (18:00-00:00)	No	No	Si	3 ore al giorno	Raramente	Raramente	Drama, Avventura, Commedia, Fantascientifiche, Medical Drama, Crime, Serie Animate	Shameless, Once Upon a Time, Arrow	Piattaforme On-Demand (Sky Online, Infinity, Netflix, Mediaset Premium, NowTV, TimVision), Streaming on-line, DVD	Si	Con la famiglia	Sera (18:00-00:00)	Si, in entrambi i pasti	Quasi Mai	Quasi Mai	Quasi Mai	1	2	2	1	10	5	9	0	24	PROBLEMATIC_BW	13	15	16	44	45	2	0
344	22	Male	1.77	68	21.7051	Single	Diploma	13	Disoccupato/a	1	Genitori	1	7	2	1	Mattina (6:00-13:00), Sera (18:00-00:00)	No	No	Si	3 ore al giorno	Raramente	Raramente	Drama, Avventura, Commedia, Fantascientifiche, Medical Drama, Crime, Serie Animate	Shameless, Once Upon a Time, Arrow	Piattaforme On-Demand (Sky Online, Infinity, Netflix, Mediaset Premium, NowTV, TimVision), Streaming on-line, DVD	Si	Con la famiglia	Sera (18:00-00:00)	Si, in entrambi i pasti	Quasi Mai	Quasi Mai	Quasi Mai	1	2	2	1	10	5	9	0	24	PROBLEMATIC_BW	13	15	16	44	45	2	0
345	22	Male	1.81	75	22.8931	Single	Diploma	13	Lavoro Fisico	1	Genitori	2	10	10	0	Pomeriggio (13:00-18:00), Sera (18:00-00:00)	Si, in entrambi i pasti	Si	Si	4 ore	Mai	Spesso	Thriller, Avventura, Commedia, Anime, Fantascientifiche, Medical Drama, Crime, Serie Animate	How I Met Your Mother; House Medical Division; Sherlock	Streaming on-line	Si	Solo	Sera (18:00-00:00)	Si, solo a pranzo	Sempre	Sempre	Qualche Volta	7	5	6	1	26	3	7	2	38	PROBLEMATIC_BW	12	14	15	41	57	19	58
346	22	Male	1.81	75	22.8931	Single	Diploma	13	Lavoro Fisico	1	Genitori	2	10	10	0	Pomeriggio (13:00-18:00), Sera (18:00-00:00)	Si, in entrambi i pasti	Si	Si	4 ore	Mai	Spesso	Thriller, Avventura, Commedia, Anime, Fantascientifiche, Medical Drama, Crime, Serie Animate	How I Met Your Mother; House Medical Division; Sherlock	Streaming on-line	Si	Solo	Sera (18:00-00:00)	Si, solo a pranzo	Sempre	Sempre	Qualche Volta	7	5	6	1	26	3	7	2	38	PROBLEMATIC_BW	12	14	15	41	57	19	58
347	22	Male	1.75	90	29.3878	Single	Diploma	13	Studente/ssa	1	Genitori	0	10	15	1	Sera (18:00-00:00)	Si, solo a cena	No	Si	1/2 ore	Mai	Mai	Thriller, Avventura, Crime	13, La casa de papel, cold case	Computer	Si	Solo	Pomeriggio (13:00-18:00)	No	Qualche Volta	Mai	Qualche Volta	1	2	2	2	35	2	9	0	46	PROBLEMATIC_BW	28	15	29	72	57	17	102
348	22	Male	1.75	90	29.3878	Single	Diploma	13	Studente/ssa	1	Genitori	0	10	15	1	Sera (18:00-00:00)	Si, solo a cena	No	Si	1/2 ore	Mai	Mai	Thriller, Avventura, Crime	13, La casa de papel, cold case	Computer	Si	Solo	Pomeriggio (13:00-18:00)	No	Qualche Volta	Mai	Qualche Volta	1	2	2	2	35	2	9	0	46	PROBLEMATIC_BW	28	15	29	72	57	17	102
349	23	Male	1.85	95	27.7575	Fidanzato/a	Diploma	13	Studente/ssa	1	Appartamento Condiviso	2	10	8	0	Sera (18:00-00:00), Notte (00:00-6:00)	No	Si	Si	2 ore	Raramente	Raramente	Thriller, Drama, Avventura, Commedia, Biografiche, Documentaristiche, Fantascientifiche, Horror, Crime	Horror	Televisore, Piattaforme On-Demand (Sky Online, Infinity, Netflix, Mediaset Premium, NowTV, TimVision)	Si	Con il partner	Sera (18:00-00:00), Notte (00:00-6:00)	No	Sempre	Qualche Volta	Mai	2	6	3 ore	1	3	3	4	2	12	PROBLEMATIC_BW	11	12	23	46	47	7	14
350	23	Male	1.85	95	27.7575	Fidanzato/a	Diploma	13	Studente/ssa	1	Appartamento Condiviso	2	10	8	0	Sera (18:00-00:00), Notte (00:00-6:00)	No	Si	Si	2 ore	Raramente	Raramente	Thriller, Drama, Avventura, Commedia, Biografiche, Documentaristiche, Fantascientifiche, Horror, Crime	Horror	Televisore, Piattaforme On-Demand (Sky Online, Infinity, Netflix, Mediaset Premium, NowTV, TimVision)	Si	Con il partner	Sera (18:00-00:00), Notte (00:00-6:00)	No	Sempre	Qualche Volta	Mai	2	6	3 ore	1	3	3	4	2	12	PROBLEMATIC_BW	11	12	23	46	47	7	14
351	23	Male	1.78	99	31.2461	Single	Diploma	13	Disoccupato/a	1	Genitori	1	6	11	1	Sera (18:00-00:00)	Si, in entrambi i pasti	No	Si	2	Mai	Raramente	Anime, Fantascientifiche, Serie Animate	I griffin, senza traccia, criminal minds	Piattaforme On-Demand (Sky Online, Infinity, Netflix, Mediaset Premium, NowTV, TimVision), Streaming on-line, DVD	Si	Solo	Sera (18:00-00:00)	No	Spesso	Spesso	Quasi Mai	4	4	2.5	2	7	2	3	2	14	PROBLEMATIC_BW	9	6	22	37	48	14	31
352	23	Male	1.78	99	31.2461	Single	Diploma	13	Disoccupato/a	1	Genitori	1	6	11	1	Sera (18:00-00:00)	Si, in entrambi i pasti	No	Si	2	Mai	Raramente	Anime, Fantascientifiche, Serie Animate	I griffin, senza traccia, criminal minds	Piattaforme On-Demand (Sky Online, Infinity, Netflix, Mediaset Premium, NowTV, TimVision), Streaming on-line, DVD	Si	Solo	Sera (18:00-00:00)	No	Spesso	Spesso	Quasi Mai	4	4	2.5	2	7	2	3	2	14	PROBLEMATIC_BW	9	6	22	37	48	14	31
353	23	Male	1.7	70	24.2215	Single	Diploma	13	Studente/ssa	1	Genitori	1	5	20	2	Sera (18:00-00:00)	No	No	Si	Una o due ore	Raramente	Raramente	Thriller, Crime	True detective, breaking bad, narcos	Piattaforme On-Demand (Sky Online, Infinity, Netflix, Mediaset Premium, NowTV, TimVision)	Si	Solo	Sera (18:00-00:00)	No	Qualche Volta	Mai	Mai	1	2	Un’ora e mezza	2	5	4	7	1	17	PROBLEMATIC_BW	29	13	17	59	61	7	35
354	23	Male	1.7	70	24.2215	Single	Diploma	13	Studente/ssa	1	Genitori	1	5	20	2	Sera (18:00-00:00)	No	No	Si	Una o due ore	Raramente	Raramente	Thriller, Crime	True detective, breaking bad, narcos	Piattaforme On-Demand (Sky Online, Infinity, Netflix, Mediaset Premium, NowTV, TimVision)	Si	Solo	Sera (18:00-00:00)	No	Qualche Volta	Mai	Mai	1	2	Un’ora e mezza	2	5	4	7	1	17	PROBLEMATIC_BW	29	13	17	59	61	7	35
355	23	Male	1.86	83	23.9912	Single	Laurea Triennale	16	Studente/ssa	1	Appartamento Condiviso	2	1	10	1	Pomeriggio (13:00-18:00), Sera (18:00-00:00)	Si, in entrambi i pasti	No	Si	1.5	Raramente	Raramente	Thriller, Fantascientifiche, Crime	Suburra Romanzo criminale Person of interest Criminal minds Ncis	Streaming on-line	No	Solo	Pomeriggio (13:00-18:00), Notte (00:00-6:00)	Si, in entrambi i pasti	Qualche Volta	Spesso	Qualche Volta	1	3	2	1	8	6	3	1	18	PROBLEMATIC_BW	9	9	11	29	31	3	30
356	23	Male	1.86	83	23.9912	Single	Laurea Triennale	16	Studente/ssa	1	Appartamento Condiviso	2	1	10	1	Pomeriggio (13:00-18:00), Sera (18:00-00:00)	Si, in entrambi i pasti	No	Si	1.5	Raramente	Raramente	Thriller, Fantascientifiche, Crime	Suburra Romanzo criminale Person of interest Criminal minds Ncis	Streaming on-line	No	Solo	Pomeriggio (13:00-18:00), Notte (00:00-6:00)	Si, in entrambi i pasti	Qualche Volta	Spesso	Qualche Volta	1	3	2	1	8	6	3	1	18	PROBLEMATIC_BW	9	9	11	29	31	3	30
357	23	Male	1.8	72	22.2222	Fidanzato/a	Diploma	15	Lavoro Fisico	0	Genitori	1	1	10	2	Mattina (6:00-13:00), Sera (18:00-00:00)	Si, in entrambi i pasti	Si	Si	10	Mai	Mai	Thriller, Drama, Avventura, Commedia, Biografiche, Documentaristiche, Fantascientifiche, Crime, Western	Game of thrones, the wolking death, grimm	Piattaforme On-Demand (Sky Online, Infinity, Netflix, Mediaset Premium, NowTV, TimVision), Streaming on-line	Si	Solo	Mattina (6:00-13:00), Pomeriggio (13:00-18:00), Sera (18:00-00:00), Notte (00:00-6:00)	Si, solo a pranzo	Sempre	Sempre	Quasi Mai	5	5	8	5	8	3	3	8	22	PROBLEMATIC_BW	25	19	18	62	61	18	59
358	23	Male	1.84	85	25.1063	Fidanzato/a	Diploma	15	Studente/ssa	0	Genitori	1	2	3	4	Mattina (6:00-13:00), Sera (18:00-00:00)	Si, in entrambi i pasti	No	Si	2	Mai	Mai	Thriller, Commedia, Anime, Documentaristiche	The walking dead teen wolf naruto	Televisore, Piattaforme On-Demand (Sky Online, Infinity, Netflix, Mediaset Premium, NowTV, TimVision)	Si	Con la famiglia	Mattina (6:00-13:00), Sera (18:00-00:00)	Si, in entrambi i pasti	Quasi Mai	Quasi Mai	Spesso	1	5	3	1	8	3	11	0	22	PROBLEMATIC_BW	8	10	20	38	43	8	46
359	23	Male	1.8	72	22.2222	Fidanzato/a	Diploma	15	Lavoro Fisico	0	Genitori	1	1	10	2	Mattina (6:00-13:00), Sera (18:00-00:00)	Si, in entrambi i pasti	Si	Si	10	Mai	Mai	Thriller, Drama, Avventura, Commedia, Biografiche, Documentaristiche, Fantascientifiche, Crime, Western	Game of thrones, the wolking death, grimm	Piattaforme On-Demand (Sky Online, Infinity, Netflix, Mediaset Premium, NowTV, TimVision), Streaming on-line	Si	Solo	Mattina (6:00-13:00), Pomeriggio (13:00-18:00), Sera (18:00-00:00), Notte (00:00-6:00)	Si, solo a pranzo	Sempre	Sempre	Quasi Mai	5	5	8	5	8	3	3	8	22	PROBLEMATIC_BW	25	19	18	62	61	18	59
360	23	Male	1.84	85	25.1063	Fidanzato/a	Diploma	15	Studente/ssa	0	Genitori	1	2	3	4	Mattina (6:00-13:00), Sera (18:00-00:00)	Si, in entrambi i pasti	No	Si	2	Mai	Mai	Thriller, Commedia, Anime, Documentaristiche	The walking dead teen wolf naruto	Televisore, Piattaforme On-Demand (Sky Online, Infinity, Netflix, Mediaset Premium, NowTV, TimVision)	Si	Con la famiglia	Mattina (6:00-13:00), Sera (18:00-00:00)	Si, in entrambi i pasti	Quasi Mai	Quasi Mai	Spesso	1	5	3	1	8	3	11	0	22	PROBLEMATIC_BW	8	10	20	38	43	8	46
361	23	Male	1.78	78	24.6181	Fidanzato/a	Laurea Triennale	18	Studente/ssa	1	Genitori	2	3	5	0	Pomeriggio (13:00-18:00), Sera (18:00-00:00)	No	No	Si	1	Qualche volta	Qualche volta	Thriller, Drama, Commedia	Mad men, breaking bad, mr robot	Piattaforme On-Demand (Sky Online, Infinity, Netflix, Mediaset Premium, NowTV, TimVision), Streaming on-line	Si	Solo	Mattina (6:00-13:00), Pomeriggio (13:00-18:00), Sera (18:00-00:00), Notte (00:00-6:00)	Si, solo a cena	Quasi Mai	Mai	Quasi Mai	1	7	5	1	11	8	8	1	28	PROBLEMATIC_BW	22	19	17	58	51	5	65
362	23	Male	1.78	78	24.6181	Fidanzato/a	Laurea Triennale	18	Studente/ssa	1	Genitori	2	3	5	0	Pomeriggio (13:00-18:00), Sera (18:00-00:00)	No	No	Si	1	Qualche volta	Qualche volta	Thriller, Drama, Commedia	Mad men, breaking bad, mr robot	Piattaforme On-Demand (Sky Online, Infinity, Netflix, Mediaset Premium, NowTV, TimVision), Streaming on-line	Si	Solo	Mattina (6:00-13:00), Pomeriggio (13:00-18:00), Sera (18:00-00:00), Notte (00:00-6:00)	Si, solo a cena	Quasi Mai	Mai	Quasi Mai	1	7	5	1	11	8	8	1	28	PROBLEMATIC_BW	22	19	17	58	51	5	65
363	23	Male	1.89	83	23.2356	Fidanzato/a	Laurea Triennale	16	Studente/ssa	0	Genitori	2	0	4	2	Pomeriggio (13:00-18:00), Notte (00:00-6:00)	Si, solo a pranzo	Si	Si	2	Qualche volta	Qualche volta	Thriller, Avventura, Fantascientifiche, Crime	Suits Gomorra Spartacus	Piattaforme On-Demand (Sky Online, Infinity, Netflix, Mediaset Premium, NowTV, TimVision)	Si	Solo	Sera (18:00-00:00), Notte (00:00-6:00)	No	Spesso	Spesso	Quasi Mai	3	3	3	1	10	11	6	2	29	PROBLEMATIC_BW	8	8	15	31	43	8	3
364	23	Male	1.82	85	25.6612	Single	Laurea Triennale	16	Studente/ssa	0	Appartamento Condiviso	1	2	14	1	Pomeriggio (13:00-18:00)	No	No	Si	2	Qualche volta	Qualche volta	Thriller, Drama, Avventura, Commedia, Anime, Fantascientifiche, Serie Animate	13 Reasons Why, Dark, How I Met Your Mother	Piattaforme On-Demand (Sky Online, Infinity, Netflix, Mediaset Premium, NowTV, TimVision), Streaming on-line	Si	Solo	Sera (18:00-00:00), Notte (00:00-6:00)	No	Spesso	Spesso	Qualche Volta	1	5	5	2	16	6	7	0	29	PROBLEMATIC_BW	10	10	18	38	39	3	31
365	23	Male	1.89	83	23.2356	Fidanzato/a	Laurea Triennale	16	Studente/ssa	0	Genitori	2	0	4	2	Pomeriggio (13:00-18:00), Notte (00:00-6:00)	Si, solo a pranzo	Si	Si	2	Qualche volta	Qualche volta	Thriller, Avventura, Fantascientifiche, Crime	Suits Gomorra Spartacus	Piattaforme On-Demand (Sky Online, Infinity, Netflix, Mediaset Premium, NowTV, TimVision)	Si	Solo	Sera (18:00-00:00), Notte (00:00-6:00)	No	Spesso	Spesso	Quasi Mai	3	3	3	1	10	11	6	2	29	PROBLEMATIC_BW	8	8	15	31	43	8	3
366	23	Male	1.82	85	25.6612	Single	Laurea Triennale	16	Studente/ssa	0	Appartamento Condiviso	1	2	14	1	Pomeriggio (13:00-18:00)	No	No	Si	2	Qualche volta	Qualche volta	Thriller, Drama, Avventura, Commedia, Anime, Fantascientifiche, Serie Animate	13 Reasons Why, Dark, How I Met Your Mother	Piattaforme On-Demand (Sky Online, Infinity, Netflix, Mediaset Premium, NowTV, TimVision), Streaming on-line	Si	Solo	Sera (18:00-00:00), Notte (00:00-6:00)	No	Spesso	Spesso	Qualche Volta	1	5	5	2	16	6	7	0	29	PROBLEMATIC_BW	10	10	18	38	39	3	31
367	23	Male	1.9	78	21.6066	Single	Laurea Triennale	16	Studente/ssa	1	Genitori	2	0	1	0	Sera (18:00-00:00), Notte (00:00-6:00)	No	No	Si	3	Mai	Mai	Thriller, Drama, Avventura, Commedia, Anime, Fantascientifiche, Crime, Serie Animate	Got, breaking bad, how i met your mother	Piattaforme On-Demand (Sky Online, Infinity, Netflix, Mediaset Premium, NowTV, TimVision)	Si	Solo	Sera (18:00-00:00), Notte (00:00-6:00)	No	Sempre	Sempre	Mai	7	10+	4	7	13	8	7	3	31	PROBLEMATIC_BW	14	10	17	41	38	13	53
368	23	Male	1.9	78	21.6066	Single	Laurea Triennale	16	Studente/ssa	1	Genitori	2	0	1	0	Sera (18:00-00:00), Notte (00:00-6:00)	No	No	Si	3	Mai	Mai	Thriller, Drama, Avventura, Commedia, Anime, Fantascientifiche, Crime, Serie Animate	Got, breaking bad, how i met your mother	Piattaforme On-Demand (Sky Online, Infinity, Netflix, Mediaset Premium, NowTV, TimVision)	Si	Solo	Sera (18:00-00:00), Notte (00:00-6:00)	No	Sempre	Sempre	Mai	7	10+	4	7	13	8	7	3	31	PROBLEMATIC_BW	14	10	17	41	38	13	53
369	23	Male	1.85	84	24.5435	Fidanzato/a	Laurea Triennale	17	Studente/ssa	0	Genitori	1	0	3	1	Sera (18:00-00:00)	No	No	Si	3	Qualche volta	Qualche volta	Thriller, Drama, Avventura, Commedia, Anime, Biografiche, Fantascientifiche, Serie Animate	Travelers , Game of thrones , orange is the new black	Televisore, Piattaforme On-Demand (Sky Online, Infinity, Netflix, Mediaset Premium, NowTV, TimVision), Streaming on-line	Si	Tutti	Sera (18:00-00:00)	Si, in entrambi i pasti	Spesso	Spesso	Mai	5	2	2	1	14	12	5	3	34	PROBLEMATIC_BW	11	11	14	36	39	4	52
370	23	Male	1.85	84	24.5435	Fidanzato/a	Laurea Triennale	17	Studente/ssa	0	Genitori	1	0	3	1	Sera (18:00-00:00)	No	No	Si	3	Qualche volta	Qualche volta	Thriller, Drama, Avventura, Commedia, Anime, Biografiche, Fantascientifiche, Serie Animate	Travelers , Game of thrones , orange is the new black	Televisore, Piattaforme On-Demand (Sky Online, Infinity, Netflix, Mediaset Premium, NowTV, TimVision), Streaming on-line	Si	Tutti	Sera (18:00-00:00)	Si, in entrambi i pasti	Spesso	Spesso	Mai	5	2	2	1	14	12	5	3	34	PROBLEMATIC_BW	11	11	14	36	39	4	52
371	23	Male	1.9	85	23.5457	Single	Diploma	13	Studente/ssa	0	Genitori	2	1	5	0.5	Sera (18:00-00:00)	No	No	Si	4/5	Qualche volta	Qualche volta	Thriller, Drama, Anime, Fantascientifiche, Horror, Crime, Serie Animate	Games of thrones, Friends, Pretty Little liars	Piattaforme On-Demand (Sky Online, Infinity, Netflix, Mediaset Premium, NowTV, TimVision), Streaming on-line	Si	Solo	Sera (18:00-00:00), Notte (00:00-6:00)	Si, solo a cena	Sempre	Spesso	Sempre	2	10+	12	1	19	11	5	1	36	PROBLEMATIC_BW	11	19	20	50	50	13	37
372	23	Male	1.9	85	23.5457	Single	Diploma	13	Studente/ssa	0	Genitori	2	1	5	0.5	Sera (18:00-00:00)	No	No	Si	4/5	Qualche volta	Qualche volta	Thriller, Drama, Anime, Fantascientifiche, Horror, Crime, Serie Animate	Games of thrones, Friends, Pretty Little liars	Piattaforme On-Demand (Sky Online, Infinity, Netflix, Mediaset Premium, NowTV, TimVision), Streaming on-line	Si	Solo	Sera (18:00-00:00), Notte (00:00-6:00)	Si, solo a cena	Sempre	Spesso	Sempre	2	10+	12	1	19	11	5	1	36	PROBLEMATIC_BW	11	19	20	50	50	13	37
373	23	Male	1.82	62	18.7175	Fidanzato/a	Diploma	13	Disoccupato/a	1	Genitori	0	0.5	8	3	Pomeriggio (13:00-18:00), Notte (00:00-6:00)	Si, in entrambi i pasti	Si	Si	2	Qualche volta	Raramente	Commedia, Serie Animate	I simpson, i griffin, due uomini e mezzo, the middle, the big bang theory	Televisore	No	Solo	Pomeriggio (13:00-18:00), Notte (00:00-6:00)	Si, solo a pranzo	Mai	Mai	Quasi Mai	2	2	2	2	15	9	5	8	37	PROBLEMATIC_BW	28	15	18	61	62	32	79
374	23	Male	1.82	62	18.7175	Fidanzato/a	Diploma	13	Disoccupato/a	1	Genitori	0	0.5	8	3	Pomeriggio (13:00-18:00), Notte (00:00-6:00)	Si, in entrambi i pasti	Si	Si	2	Qualche volta	Raramente	Commedia, Serie Animate	I simpson, i griffin, due uomini e mezzo, the middle, the big bang theory	Televisore	No	Solo	Pomeriggio (13:00-18:00), Notte (00:00-6:00)	Si, solo a pranzo	Mai	Mai	Quasi Mai	2	2	2	2	15	9	5	8	37	PROBLEMATIC_BW	28	15	18	61	62	32	79
375	23	Male	1.62	53	20.1951	Single	Diploma	13	Studente/ssa	1	Genitori	1	4	6	0	Sera (18:00-00:00)	Si, in entrambi i pasti	No	Si	1	Qualche volta	Qualche volta	Thriller, Drama, Avventura, Commedia, Anime, Fantascientifiche, Crime, Serie Animate	Arrow The flash Supergirl iZombie Riverdale Black lightning	Piattaforme On-Demand (Sky Online, Infinity, Netflix, Mediaset Premium, NowTV, TimVision), Streaming on-line	Si	Solo	Sera (18:00-00:00)	No	Spesso	Spesso	Mai	3	3	3	1	15	12	7	11	45	PROBLEMATIC_BW	9	15	13	37	66	9	57
376	23	Male	1.62	53	20.1951	Single	Diploma	13	Studente/ssa	1	Genitori	1	4	6	0	Sera (18:00-00:00)	Si, in entrambi i pasti	No	Si	1	Qualche volta	Qualche volta	Thriller, Drama, Avventura, Commedia, Anime, Fantascientifiche, Crime, Serie Animate	Arrow The flash Supergirl iZombie Riverdale Black lightning	Piattaforme On-Demand (Sky Online, Infinity, Netflix, Mediaset Premium, NowTV, TimVision), Streaming on-line	Si	Solo	Sera (18:00-00:00)	No	Spesso	Spesso	Mai	3	3	3	1	15	12	7	11	45	PROBLEMATIC_BW	9	15	13	37	66	9	57
377	24	Male	1.78	98	30.9304	Single	Laurea Triennale	16	Studente/ssa	0	Appartamento Condiviso	0	2	10	1	Sera (18:00-00:00)	No	No	Si	2	Qualche volta	Mai	Avventura, Fantascientifiche, Crime	Grimm, got, shadowhunters	Piattaforme On-Demand (Sky Online, Infinity, Netflix, Mediaset Premium, NowTV, TimVision)	Si	Solo	Mattina (6:00-13:00), Sera (18:00-00:00)	No	Qualche Volta	Sempre	Quasi Mai	2	2	2	1	3	0	0	0	3	PROBLEMATIC_BW	14	9	13	36	35	6	5
378	24	Male	1.78	98	30.9304	Single	Laurea Triennale	16	Studente/ssa	0	Appartamento Condiviso	0	2	10	1	Sera (18:00-00:00)	No	No	Si	2	Qualche volta	Mai	Avventura, Fantascientifiche, Crime	Grimm, got, shadowhunters	Piattaforme On-Demand (Sky Online, Infinity, Netflix, Mediaset Premium, NowTV, TimVision)	Si	Solo	Mattina (6:00-13:00), Sera (18:00-00:00)	No	Qualche Volta	Sempre	Quasi Mai	2	2	2	1	3	0	0	0	3	PROBLEMATIC_BW	14	9	13	36	35	6	5
379	24	Male	1.77	110	35.1112	Single	Diploma	13	Lavoro Intellettuale	0	Genitori	0	10	5	2	Pomeriggio (13:00-18:00)	Si, solo a pranzo	No	Si	Attualmente 2	Raramente	Raramente	Thriller, Avventura, Fantascientifiche, Horror, Crime	Non metto titoli perchè vanno a rotazione	Televisore, Streaming on-line	No	Solo	Sera (18:00-00:00)	Si, solo a pranzo	Mai	Mai	Mai	3	2	2	3	2	1	2	0	5	PROBLEMATIC_BW	8	7	20	35	32	0	19
380	24	Male	1.77	110	35.1112	Single	Diploma	13	Lavoro Intellettuale	0	Genitori	0	10	5	2	Pomeriggio (13:00-18:00)	Si, solo a pranzo	No	Si	Attualmente 2	Raramente	Raramente	Thriller, Avventura, Fantascientifiche, Horror, Crime	Non metto titoli perchè vanno a rotazione	Televisore, Streaming on-line	No	Solo	Sera (18:00-00:00)	Si, solo a pranzo	Mai	Mai	Mai	3	2	2	3	2	1	2	0	5	PROBLEMATIC_BW	8	7	20	35	32	0	19
381	24	Male	1.8	75	23.1481	Single	Licenza Media	8	Disoccupato/a	1	Genitori	1	0	24	7	Pomeriggio (13:00-18:00), Sera (18:00-00:00), Notte (00:00-6:00)	Si, in entrambi i pasti	No	Si	3	Spesso	Qualche volta	Avventura, Commedia, Biografiche	Narcos the walking dead gomorra	Televisore, Streaming on-line	Si	Con la famiglia	Pomeriggio (13:00-18:00), Sera (18:00-00:00), Notte (00:00-6:00)	No	Mai	Mai	Qualche Volta	1	10+	6	1	3	2	3	0	8	PROBLEMATIC_BW	7	5	11	23	34	0	2
382	24	Male	1.8	75	23.1481	Single	Licenza Media	8	Disoccupato/a	1	Genitori	1	0	24	7	Pomeriggio (13:00-18:00), Sera (18:00-00:00), Notte (00:00-6:00)	Si, in entrambi i pasti	No	Si	3	Spesso	Qualche volta	Avventura, Commedia, Biografiche	Narcos the walking dead gomorra	Televisore, Streaming on-line	Si	Con la famiglia	Pomeriggio (13:00-18:00), Sera (18:00-00:00), Notte (00:00-6:00)	No	Mai	Mai	Qualche Volta	1	10+	6	1	3	2	3	0	8	PROBLEMATIC_BW	7	5	11	23	34	0	2
383	24	Male	1.75	85	27.7551	Single	Diploma	20	Studente/ssa	1	Appartamento Condiviso	1	15	5	4	Mattina (6:00-13:00), Sera (18:00-00:00)	No	No	Si	4	Spesso	Spesso	Avventura, Documentaristiche, Fantascientifiche, Horror	The walking dead, Sense8, The100, The Expanse, Griffin	Streaming on-line	Si	Solo	Sera (18:00-00:00)	Si, solo a cena	Spesso	Spesso	Mai	7	4	3 ore	7	2	4	3	0	9	PROBLEMATIC_BW	9	7	19	35	35	0	10
384	24	Male	1.75	85	27.7551	Single	Diploma	20	Studente/ssa	1	Appartamento Condiviso	1	15	5	4	Mattina (6:00-13:00), Sera (18:00-00:00)	No	No	Si	4	Spesso	Spesso	Avventura, Documentaristiche, Fantascientifiche, Horror	The walking dead, Sense8, The100, The Expanse, Griffin	Streaming on-line	Si	Solo	Sera (18:00-00:00)	Si, solo a cena	Spesso	Spesso	Mai	7	4	3 ore	7	2	4	3	0	9	PROBLEMATIC_BW	9	7	19	35	35	0	10
385	24	Male	1.79	64	19.9744	Fidanzato/a	Laurea Magistrale	18	Lavoro Intellettuale	1	Solo	1	5	2.5	0.5	Sera (18:00-00:00)	No	No	Si	0.5 ore	Mai	Mai	Commedia, Anime, Fantascientifiche	How I met your mother, Big bang theory, Dark	Streaming on-line	No	Solo	Sera (18:00-00:00)	Si, in entrambi i pasti	Qualche Volta	Mai	Quasi Mai	1	2	1	1	8	1	1	1	11	PROBLEMATIC_BW	7	18	27	52	34	9	41
386	24	Male	1.79	64	19.9744	Fidanzato/a	Laurea Magistrale	18	Lavoro Intellettuale	1	Solo	1	5	2.5	0.5	Sera (18:00-00:00)	No	No	Si	0.5 ore	Mai	Mai	Commedia, Anime, Fantascientifiche	How I met your mother, Big bang theory, Dark	Streaming on-line	No	Solo	Sera (18:00-00:00)	Si, in entrambi i pasti	Qualche Volta	Mai	Quasi Mai	1	2	1	1	8	1	1	1	11	PROBLEMATIC_BW	7	18	27	52	34	9	41
387	24	Male	1.8	75	23.1481	Single	Laurea Triennale	16	Studente/ssa	1	Genitori	1	5	6	2	Sera (18:00-00:00)	No	No	Si	1	Raramente	Raramente	Thriller, Commedia, Fantascientifiche	game of thrones, new girl, house of cards	Televisore, Streaming on-line	Si	Solo	Sera (18:00-00:00)	No	Mai	Mai	Mai	3	2	2	1	5	5	3	0	13	PROBLEMATIC_BW	14	7	10	31	43	0	12
388	24	Male	1.8	75	23.1481	Single	Laurea Triennale	16	Studente/ssa	1	Genitori	1	5	6	2	Sera (18:00-00:00)	No	No	Si	1	Raramente	Raramente	Thriller, Commedia, Fantascientifiche	game of thrones, new girl, house of cards	Televisore, Streaming on-line	Si	Solo	Sera (18:00-00:00)	No	Mai	Mai	Mai	3	2	2	1	5	5	3	0	13	PROBLEMATIC_BW	14	7	10	31	43	0	12
389	24	Male	1.67	75	26.8923	Fidanzato/a	Diploma	18	Studente/ssa	1	Genitori	5	10	8	2	Pomeriggio (13:00-18:00), Sera (18:00-00:00)	Si, in entrambi i pasti	No	Si	1-3 ore	Raramente	Raramente	Thriller, Avventura, Commedia, Anime, Biografiche, Documentaristiche, Fantascientifiche, Medical Drama, Crime, Serie Animate	The Crown. Stranger Things. Il Trono di Spade. Death Note. Dark. The man in the high castle.	Televisore, Piattaforme On-Demand (Sky Online, Infinity, Netflix, Mediaset Premium, NowTV, TimVision), Streaming on-line, DVD	Si	Con il partner	Pomeriggio (13:00-18:00), Sera (18:00-00:00), Notte (00:00-6:00)	No	Spesso	Qualche Volta	Spesso	2	3	3	2	6	8	4	0	18	PROBLEMATIC_BW	24	16	17	57	56	15	49
390	24	Male	1.67	75	26.8923	Fidanzato/a	Diploma	18	Studente/ssa	1	Genitori	5	10	8	2	Pomeriggio (13:00-18:00), Sera (18:00-00:00)	Si, in entrambi i pasti	No	Si	1-3 ore	Raramente	Raramente	Thriller, Avventura, Commedia, Anime, Biografiche, Documentaristiche, Fantascientifiche, Medical Drama, Crime, Serie Animate	The Crown. Stranger Things. Il Trono di Spade. Death Note. Dark. The man in the high castle.	Televisore, Piattaforme On-Demand (Sky Online, Infinity, Netflix, Mediaset Premium, NowTV, TimVision), Streaming on-line, DVD	Si	Con il partner	Pomeriggio (13:00-18:00), Sera (18:00-00:00), Notte (00:00-6:00)	No	Spesso	Qualche Volta	Spesso	2	3	3	2	6	8	4	0	18	PROBLEMATIC_BW	24	16	17	57	56	15	49
391	24	Male	1.8	76	23.4568	Fidanzato/a	Laurea Triennale	16	Lavoro Intellettuale	1	Appartamento Condiviso	1	0	3	1	Pomeriggio (13:00-18:00)	No	No	Si	Tanto	Spesso	Spesso	Thriller, Drama, Avventura, Horror, Crime	Azzardo, violenza, prostituzione, droga	Televisore, Piattaforme On-Demand (Sky Online, Infinity, Netflix, Mediaset Premium, NowTV, TimVision), Streaming on-line	Si	Con il partner	Pomeriggio (13:00-18:00)	No	Qualche Volta	Qualche Volta	Qualche Volta	5	5	4	3	10	4	3	4	21	PROBLEMATIC_BW	15	12	24	51	46	13	48
392	24	Male	1.8	76	23.4568	Fidanzato/a	Laurea Triennale	16	Lavoro Intellettuale	1	Appartamento Condiviso	1	0	3	1	Pomeriggio (13:00-18:00)	No	No	Si	Tanto	Spesso	Spesso	Thriller, Drama, Avventura, Horror, Crime	Azzardo, violenza, prostituzione, droga	Televisore, Piattaforme On-Demand (Sky Online, Infinity, Netflix, Mediaset Premium, NowTV, TimVision), Streaming on-line	Si	Con il partner	Pomeriggio (13:00-18:00)	No	Qualche Volta	Qualche Volta	Qualche Volta	5	5	4	3	10	4	3	4	21	PROBLEMATIC_BW	15	12	24	51	46	13	48
393	24	Male	1.76	56	18.0785	Single	Laurea Triennale	17	Studente/ssa	1	Appartamento Condiviso	1	20	8	0.5	Sera (18:00-00:00)	No	No	Si	2	Qualche volta	Qualche volta	Thriller, Commedia, Anime, Fantascientifiche	Always Sunny in Philadelphia, Stranger Things, Scrubs	Piattaforme On-Demand (Sky Online, Infinity, Netflix, Mediaset Premium, NowTV, TimVision)	Si	Con amici	Sera (18:00-00:00)	No	Spesso	Qualche Volta	Mai	2	5	1.6	2	10	9	6	0	25	PROBLEMATIC_BW	7	14	15	36	49	5	26
394	24	Male	1.76	56	18.0785	Single	Laurea Triennale	17	Studente/ssa	1	Appartamento Condiviso	1	20	8	0.5	Sera (18:00-00:00)	No	No	Si	2	Qualche volta	Qualche volta	Thriller, Commedia, Anime, Fantascientifiche	Always Sunny in Philadelphia, Stranger Things, Scrubs	Piattaforme On-Demand (Sky Online, Infinity, Netflix, Mediaset Premium, NowTV, TimVision)	Si	Con amici	Sera (18:00-00:00)	No	Spesso	Qualche Volta	Mai	2	5	1.6	2	10	9	6	0	25	PROBLEMATIC_BW	7	14	15	36	49	5	26
395	24	Male	1.82	80	24.1517	Single	Laurea Triennale	16	Studente/ssa	0	Genitori	1	3	10	1	Sera (18:00-00:00)	Si, solo a cena	No	Si	2	Qualche volta	Qualche volta	Thriller, Drama, Avventura, Commedia, Fantascientifiche, Crime	How i met your mother; sense8; sons of anarchy	Piattaforme On-Demand (Sky Online, Infinity, Netflix, Mediaset Premium, NowTV, TimVision)	Si	Solo	Sera (18:00-00:00)	Si, solo a pranzo	Spesso	Spesso	Mai	3	2	2	4	12	5	10	1	28	PROBLEMATIC_BW	15	16	18	49	45	10	17
396	24	Male	1.82	80	24.1517	Single	Laurea Triennale	16	Studente/ssa	0	Genitori	1	3	10	1	Sera (18:00-00:00)	Si, solo a cena	No	Si	2	Qualche volta	Qualche volta	Thriller, Drama, Avventura, Commedia, Fantascientifiche, Crime	How i met your mother; sense8; sons of anarchy	Piattaforme On-Demand (Sky Online, Infinity, Netflix, Mediaset Premium, NowTV, TimVision)	Si	Solo	Sera (18:00-00:00)	Si, solo a pranzo	Spesso	Spesso	Mai	3	2	2	4	12	5	10	1	28	PROBLEMATIC_BW	15	16	18	49	45	10	17
397	24	Male	1.68	66	23.3844	Fidanzato/a	Diploma	21	Studente/ssa	1	Appartamento Condiviso	2	3	5	1	Sera (18:00-00:00)	Si, solo a cena	No	Si	Dipende dal periodo, 0h o 4-5h	Raramente	Spesso	Drama, Avventura	Trono di spade, the leftovers, genius	Televisore	Si	Solo	Sera (18:00-00:00)	Si, solo a cena	Spesso	Mai	Mai	2	4	3	2	13	7	6	3	29	PROBLEMATIC_BW	7	6	17	30	28	2	13
398	24	Male	1.68	66	23.3844	Fidanzato/a	Diploma	21	Studente/ssa	1	Appartamento Condiviso	2	3	5	1	Sera (18:00-00:00)	Si, solo a cena	No	Si	Dipende dal periodo, 0h o 4-5h	Raramente	Spesso	Drama, Avventura	Trono di spade, the leftovers, genius	Televisore	Si	Solo	Sera (18:00-00:00)	Si, solo a cena	Spesso	Mai	Mai	2	4	3	2	13	7	6	3	29	PROBLEMATIC_BW	7	6	17	30	28	2	13
399	24	Male	1.75	84	27.4286	Single	Diploma	13	Lavoro Intellettuale	1	Genitori	1	1	3	3	Sera (18:00-00:00)	No	No	Si	2	Qualche volta	Qualche volta	Crime	Games of thrones peaky blinder how I met your mother	Piattaforme On-Demand (Sky Online, Infinity, Netflix, Mediaset Premium, NowTV, TimVision)	Si	Solo	Sera (18:00-00:00)	No	Spesso	Qualche Volta	Qualche Volta	1	6	4	2	14	10	8	4	36	PROBLEMATIC_BW	22	16	21	59	51	9	45
400	24	Male	1.75	84	27.4286	Single	Diploma	13	Lavoro Intellettuale	1	Genitori	1	1	3	3	Sera (18:00-00:00)	No	No	Si	2	Qualche volta	Qualche volta	Crime	Games of thrones peaky blinder how I met your mother	Piattaforme On-Demand (Sky Online, Infinity, Netflix, Mediaset Premium, NowTV, TimVision)	Si	Solo	Sera (18:00-00:00)	No	Spesso	Qualche Volta	Qualche Volta	1	6	4	2	14	10	8	4	36	PROBLEMATIC_BW	22	16	21	59	51	9	45
401	24	Male	1.69	68	23.8087	Single	Laurea Triennale	16	Studente/ssa	1	Appartamento Condiviso	1	20	40	3	Notte (00:00-6:00)	No	No	Si	2	Raramente	Raramente	Thriller, Drama, Avventura, Biografiche, Crime	Romanzo criminale Vikings Soprano's	Televisore	Si	Solo	Notte (00:00-6:00)	No	Qualche Volta	Qualche Volta	Qualche Volta	3	4	5	1	20	10	6	8	44	PROBLEMATIC_BW	21	15	24	60	34	3	0
402	24	Male	1.69	68	23.8087	Single	Laurea Triennale	16	Studente/ssa	1	Appartamento Condiviso	1	20	40	3	Notte (00:00-6:00)	No	No	Si	2	Raramente	Raramente	Thriller, Drama, Avventura, Biografiche, Crime	Romanzo criminale Vikings Soprano's	Televisore	Si	Solo	Notte (00:00-6:00)	No	Qualche Volta	Qualche Volta	Qualche Volta	3	4	5	1	20	10	6	8	44	PROBLEMATIC_BW	21	15	24	60	34	3	0
403	24	Male	1.75	72	23.5102	Fidanzato/a	Diploma	13	Lavoro Fisico	1	Appartamento Condiviso	2	0	14	2	Sera (18:00-00:00)	Si, solo a cena	No	Si	3	Qualche volta	Qualche volta	Thriller, Drama, Anime, Fantascientifiche, Crime, Western	Game of thrones, breaking bad, Lost	Televisore, Piattaforme On-Demand (Sky Online, Infinity, Netflix, Mediaset Premium, NowTV, TimVision)	Si	Solo	Sera (18:00-00:00), Notte (00:00-6:00)	Si, solo a cena	Spesso	Spesso	Qualche Volta	3	6	4	3	18	14	10	4	46	PROBLEMATIC_BW	12	14	15	41	48	5	24
404	24	Male	1.75	72	23.5102	Fidanzato/a	Diploma	13	Lavoro Fisico	1	Appartamento Condiviso	2	0	14	2	Sera (18:00-00:00)	Si, solo a cena	No	Si	3	Qualche volta	Qualche volta	Thriller, Drama, Anime, Fantascientifiche, Crime, Western	Game of thrones, breaking bad, Lost	Televisore, Piattaforme On-Demand (Sky Online, Infinity, Netflix, Mediaset Premium, NowTV, TimVision)	Si	Solo	Sera (18:00-00:00), Notte (00:00-6:00)	Si, solo a cena	Spesso	Spesso	Qualche Volta	3	6	4	3	18	14	10	4	46	PROBLEMATIC_BW	12	14	15	41	48	5	24
405	18	Female	1.6	55	21.4844	Fidanzato/a	Licenza Media	8	Studente/ssa	1	Genitori	3	1	5	0	Sera (18:00-00:00)	No	No	No		Raramente																					NO_WATCHER	28	24	18	70	60	31	83
406	18	Female	1.62	55	20.9572	Single	Diploma	13	Studente/ssa	1	Genitori	0	10	14	4	Mattina (6:00-13:00), Sera (18:00-00:00)	Si, in entrambi i pasti	No	No		Raramente																					NO_WATCHER	25	20	17	62	59	31	125
407	19	Female	1.82	80	24.1517	Single	Diploma	12	Studente/ssa	1	Genitori	0	10	21	1	Sera (18:00-00:00)	No	No	No		Mai																					NO_WATCHER	14	17	14	45	44	8	38
408	19	Female	2.99	399	44.6304	Vedovo/a	Dottorato o Specializzazione	13	Studente/ssa	0	Rinoceronti	358				Mattina (6:00-13:00), Pomeriggio (13:00-18:00), Sera (18:00-00:00), Notte (00:00-6:00)	Si, in entrambi i pasti	Si	No		Qualche volta																					NO_WATCHER	7	9	24	40	47	0	30
409	19	Female	1.7	75	25.9516	Single	Laurea Triennale	16	Studente/ssa	1	Genitori	3	10	15	0.5	Pomeriggio (13:00-18:00)	Si, solo a pranzo	No	No		Raramente																					NO_WATCHER	9	13	10	32	40	6	14
410	19	Female	1.72	102	34.4781	Single	Diploma	13	Lavoro Fisico	1	Genitori	0	0	10	4	Mattina (6:00-13:00), Pomeriggio (13:00-18:00), Sera (18:00-00:00)	Si, solo a pranzo	Si	No		Qualche volta																					NO_WATCHER	10	18	32	60	47	2	76
411	19	Female	1.82	72	21.7365	Single	Diploma	13	Studente/ssa	1	Genitori	2	1	3	1	Sera (18:00-00:00)	Si, solo a cena	No	No		Qualche volta																					NO_WATCHER	11	12	25	48	52	9	42
412	19	Female	1.59	70	27.6888	Single	Diploma	13	Studente/ssa	1	Genitori	0	9	5	4	Pomeriggio (13:00-18:00), Sera (18:00-00:00)	Si, in entrambi i pasti	No	No		Raramente																					NO_WATCHER	17	23	18	58	57	15	59
413	19	Female	1.59	70	27.6888	Single	Diploma	13	Studente/ssa	1	Genitori	0	9	5	5	Pomeriggio (13:00-18:00), Sera (18:00-00:00)	Si, in entrambi i pasti	No	No		Raramente																					NO_WATCHER	12	25	20	57	52	18	57
414	19	Female	1.68	50	17.7154	Single	Diploma	13	Studente/ssa	1	Genitori		3	5	2	Pomeriggio (13:00-18:00), Sera (18:00-00:00)	No	No	No		Raramente																					NO_WATCHER	29	21	17	67	62	12	91
415	20	Female	1.52	48	20.7756	Single	Diploma	15	Studente/ssa	1	Genitori	2	28	5	3	Mattina (6:00-13:00)	Si, solo a cena	Si	No		Qualche volta																					NO_WATCHER	12	10	10	32	41	3	69
416	20	Female	1.64	61	22.68	Fidanzato/a	Diploma	13	Lavoro Intellettuale	1	Mamma e fratello	0		12	2	Pomeriggio (13:00-18:00), Sera (18:00-00:00)	Si, solo a pranzo	Si	No		Spesso																					NO_WATCHER	16	13	12	41	67	18	59
417	21	Female	1.6	47	18.3594	Fidanzato/a	Diploma	13	Studente/ssa	1	Genitori	0	5	5	1	Sera (18:00-00:00)	No	No	No		Raramente																					NO_WATCHER	9	7	13	29	31	8	23
418	21	Female	1.66	63	22.8625	Single	Diploma	13	Studente/ssa	0	Appartamento Condiviso	0	2	28	2	Sera (18:00-00:00)	Si, solo a cena	No	No		Spesso																					NO_WATCHER	13	13	20	46	59	7	39
419	21	Female	1.6	45	17.5781	Single	Diploma	13	Studente/ssa	0	Genitori	1	7	4	0	Sera (18:00-00:00)	Si, in entrambi i pasti	No	No		Raramente																					NO_WATCHER	18	10	21	49	49	10	44
420	21	Female	1.65	60	22.0386	Fidanzato/a	Diploma	15	Studente/ssa	0	Appartamento Condiviso	3	15	15	2	Pomeriggio (13:00-18:00)	Si, solo a cena	No	No		Mai																					NO_WATCHER	21	17	18	56	52	9	58
421	21	Female	1.7	57	19.7232	Single	Diploma	13	Disoccupato/a	0	Genitori	0	0	20	1	Pomeriggio (13:00-18:00)	Si, in entrambi i pasti	No	No		Qualche volta																					NO_WATCHER	24	12	16	52	47	17	46
422	22	Female	1.76	62	20.0155	Fidanzato/a	Diploma	16	Studente/ssa	0	Genitori	1	1	2	0.5	Sera (18:00-00:00)	No	No	No		Qualche volta																					NO_WATCHER	24	19	22	65	62	20	48
423	22	Female	1.6	52	20.3125	Single	Diploma	15	Studente/ssa	1	Genitori	1	7		1	Sera (18:00-00:00)	Si, in entrambi i pasti	No	No		Raramente																					NO_WATCHER	21	25	20	66	50	3	76
424	22	Female	1.65	50	18.3655	Sposato/a o Convivente	Licenza Media	8	Casalingo/a	1	Genitori	0	0	7	1	Sera (18:00-00:00)	Si, in entrambi i pasti	No	Si	1	Raramente	Raramente	Romantiche	Rosy abate	Televisore, Streaming on-line	No	Con il partner	Sera (18:00-00:00)	Si, in entrambi i pasti	Mai	Mai	Qualche Volta	1	4	1	1						NO_WATCHER	11	21	24	56	39	10	12
425	23	Female	1.68	51	18.0697	Single	Laurea Triennale	16	Studente/ssa	0	Genitori	1	8	2	2	Sera (18:00-00:00)	Si, solo a pranzo	No	No		Mai																					NO_WATCHER	17	14	17	48	54	18	46
426	23	Female	1.63	52	19.5717	Fidanzato/a	Laurea Triennale	18	Studente/ssa	1	Genitori	1	3	0	0	Sera (18:00-00:00)	Si, solo a cena	No	No		Mai																					NO_WATCHER	8	7	13	28	46	0	19
427	23	Female	1.64	60	22.3081	Fidanzato/a	Laurea Triennale	16	Studente/ssa	1	Genitori	2	2	6	3	Sera (18:00-00:00)	Si, solo a cena	No	No		Raramente																					NO_WATCHER	13	15	24	52	44	5	54
428	24	Female	1.76	62	20.0155	Fidanzato/a	Laurea Triennale	16	Studente/ssa	1	Genitori	2	20	5	2	Sera (18:00-00:00)	Si, in entrambi i pasti	No	No		Qualche volta																					NO_WATCHER	13	8	12	33	52	10	65
429	24	Female	1.6	52	20.3125	Single	Diploma	13	Lavoro Fisico	0	Genitori	0	5	40	2	Mattina (6:00-13:00)	No	No	No		Mai																					NO_WATCHER	33	18	14	65	59	30	51
430	25	Female	1.65	48	17.6309	Fidanzato/a	Laurea Magistrale	18	Studente/ssa	0	Genitori	0	10	3	2	Sera (18:00-00:00)	No	Si	No		Mai																					NO_WATCHER	22	13	13	48	36	1	47
431	25	Female	1.7	57	19.7232	Fidanzato/a	Laurea Triennale	16	Studente/ssa	1	Genitori	5	10	3	3	Sera (18:00-00:00)	Si, in entrambi i pasti	No	No		Qualche volta																					NO_WATCHER	7	20	16	43	42	9	36
432	25	Female	1.56	65	26.7094	Single	Diploma	13	Disoccupato/a	0	Genitori	0	10	10	5	Sera (18:00-00:00)	Si, in entrambi i pasti	No	No		Raramente																					NO_WATCHER	35	21	25	81	70	35	81
433	25	Female	1.68	66	23.3844	Single	Laurea Triennale	15	Studente/ssa	1	Appartamento Condiviso	1	2	5	1	Pomeriggio (13:00-18:00), Sera (18:00-00:00)	No	No	No		Qualche volta																					NO_WATCHER	28	17	24	69	54	21	67
434	26	Female	1.55	53	22.0604	Single	Diploma	13	Studente/ssa	1	Genitori	5	14	14	1	Mattina (6:00-13:00), Sera (18:00-00:00)	Si, in entrambi i pasti	No	No		Mai																					NO_WATCHER	11	9	8	28	66	19	48
435	26	Female	1.74	66	21.7994	Fidanzato/a	Laurea Triennale	20	Studente/ssa	0	Appartamento Condiviso	1	20	10	2	Sera (18:00-00:00)	Si, solo a cena	Si	No		Spesso																					NO_WATCHER	9	7	18	34	63	32	54
436	26	Female	1.64	64	23.7954	Single	Laurea Triennale	16	Studente/ssa	1	Genitori	2	10	2	1	Sera (18:00-00:00)	Si, solo a pranzo	Si	No		Qualche volta																					NO_WATCHER	7	9	14	30	35	11	13
437	26	Female	1.56	57	23.4221	Fidanzato/a	Laurea Triennale	18	Studente/ssa	0	Solo	0	12	5	3	Pomeriggio (13:00-18:00), Sera (18:00-00:00)	Si, in entrambi i pasti	No	No		Spesso																					NO_WATCHER	27	18	31	76	55	11	92
438	26	Female	1.6	46	17.9687	Single	Laurea Triennale	18	Studente/ssa	1	Genitori	0	4	1	2	Sera (18:00-00:00)	Si, in entrambi i pasti	Si	No		Mai																					NO_WATCHER	11	7	15	33	39	8	15
439	26	Female	1.7	58	20.0692	Fidanzato/a	Laurea Magistrale	18	Lavoro Intellettuale	0	Genitori	0	10	2	1	Sera (18:00-00:00)	Si, solo a cena	No	No		Mai																					NO_WATCHER	7	5	14	26	29	0	19
440	26	Female	1.6	66	25.7812	Single	Diploma	14	Studente/ssa	1	Appartamento Condiviso	0	2	9	1	Sera (18:00-00:00)	Si, solo a cena	No	No		Raramente																					NO_WATCHER	24	18	17	59	60	36	72
441	26	Female	1.52	56	24.2382	Sposato/a o Convivente	Diploma	13	Casalingo/a	1	Coniuge (o fidanzato/a)	1	3	5	3	Pomeriggio (13:00-18:00), Sera (18:00-00:00)	Si, in entrambi i pasti	No	No		Raramente																					NO_WATCHER	24	16	16	56	61	29	79
442	28	Female	1.7	58	20.0692	Sposato/a o Convivente	Laurea Magistrale	18	Lavoro Intellettuale	1	Coniuge (o fidanzato/a)	1	10	5	0.5	Sera (18:00-00:00)	No	No	No		Raramente																					NO_WATCHER	15	13	13	41	66	27	63
443	30	Female	1.5	45	20	Sposato/a o Convivente	Laurea Magistrale	21	Lavoro Intellettuale	0	Coniuge (o fidanzato/a)	0	7	20	1	Sera (18:00-00:00)	Si, solo a cena	No	No		Qualche volta																					NO_WATCHER	11	12	13	36	33	5	45
444	30	Female	1.69	50	17.5064	Sposato/a o Convivente	Diploma	13	Lavoro Fisico	1	Appartamento Condiviso	0	8	8	0	Sera (18:00-00:00)	No	No	No		Mai																					NO_WATCHER	18	14	10	42	54	3	53
445	33	Female	1.63	50	18.8189	Single	Laurea Triennale	16	Studente/ssa	1	Genitori	2	2	10	2	Sera (18:00-00:00), Notte (00:00-6:00)	Si, solo a cena	Si	No		Qualche volta																					NO_WATCHER	10	7	12	29	42	3	34
446	33	Female	1.62	52	19.8141	Fidanzato/a	Laurea Triennale	21	Studente/ssa	1	Genitori	0	2	5	1	Sera (18:00-00:00)	No	No	No		Raramente																					NO_WATCHER	14	10	17	41	45	4	31
447	34	Female	1.6	62	24.2187	Sposato/a o Convivente	Laurea Magistrale	18	Lavoro Intellettuale	1	Coniuge (o fidanzato/a)	4	5	5	1	Notte (00:00-6:00)	No	Si	No		Mai																					NO_WATCHER	14	10	16	40	36	4	23
448	35	Female	1.75	62	20.2449	Fidanzato/a	Laurea Triennale	16	Lavoro Intellettuale	1	Coniuge (o fidanzato/a)	1	3	7	2	Sera (18:00-00:00)	Si, solo a cena	Si	No		Raramente																					NO_WATCHER	15	7	17	39	43	14	41
449	35	Female	1.65	53	19.4674	Single	Laurea Triennale	17	Lavoro Fisico	0	Solo	1	7	15	2	Sera (18:00-00:00)	Si, in entrambi i pasti	Si	No		Qualche volta																					NO_WATCHER	7	8	16	31	52	10	56
450	18	Male	1.85	70	20.4529	Fidanzato/a	Licenza Media	8	Studente/ssa	0	Genitori	1	6	30	1	Sera (18:00-00:00)	Si, in entrambi i pasti	No	No		Mai																					NO_WATCHER	29	15	9	53	61	14	20
451	18	Male	1.87	83	23.7353	Single	Licenza Media	8	Studente/ssa	0	Genitori	1	0	1	2	Sera (18:00-00:00)	No	No	No		Qualche volta																					NO_WATCHER	15	9	29	53	61	25	39
452	18	Male	1.76	60	19.3698	Single	Diploma	13	Disoccupato/a	1	Genitori	1	1	70	2	Pomeriggio (13:00-18:00), Sera (18:00-00:00)	Si, in entrambi i pasti	No	No		Qualche volta																					NO_WATCHER	22	17	21	60	53	14	48
453	18	Male	1.7	69	23.8754	Fidanzato/a	Licenza Media	8	Studente/ssa	0	Genitori	0	0		10	Notte (00:00-6:00)	Si, in entrambi i pasti	No	No		Qualche volta																					NO_WATCHER	16	16	26	58	69	35	69
454	18	Male	1.78	60.6	19.1264	Single	Licenza Media	12	Studente/ssa	0	Genitori	4		10	1	Sera (18:00-00:00)	Si, in entrambi i pasti	No	No		Spesso																					NO_WATCHER	9	12	12	33	35	6	37
455	18	Male	1.8	60	18.5185	Single	Diploma	13	Studente/ssa	1	Genitori	0	0	2	2	Pomeriggio (13:00-18:00), Sera (18:00-00:00)	Si, in entrambi i pasti	No	No		Raramente																					NO_WATCHER	13	11	18	42	49	1	64
456	18	Male	1.8	89.7	27.6852	Single	Diploma	13	Studente/ssa	1	Genitori	1	1	6	0	Sera (18:00-00:00)	Si, in entrambi i pasti	Si	No		Mai																					NO_WATCHER	17	14	24	55	32	4	16
457	19	Male	1.85	78	22.7904	Fidanzato/a	Diploma	13	Studente/ssa	1	Genitori	0	7	3	3	Pomeriggio (13:00-18:00), Sera (18:00-00:00)	Si, solo a pranzo	No	No		Raramente																					NO_WATCHER	18	19	21	58	41	7	22
458	21	Male	1.71	93	31.8047	Fidanzato/a	Diploma	18	Studente/ssa	0	Genitori	4	2	5	1	Sera (18:00-00:00)	Si, in entrambi i pasti	No	No		Qualche volta																					NO_WATCHER	15	8	13	36	53	18	52
459	22	Male	1.7	66.8	23.1142	Single	Diploma	13	Studente/ssa	1	Appartamento Condiviso	0	0	2	1	Sera (18:00-00:00)	No	No	No		Mai																					NO_WATCHER	14	8	13	35	51	9	44
460	22	Male	1.96	95	24.7293	Fidanzato/a	Licenza Media	8	Lavoro Intellettuale	0	Genitori	1	2	4	2	Sera (18:00-00:00)	No	Si	No		Raramente																					NO_WATCHER	10	8	20	38	32	5	7
461	22	Male	1.7	100	34.6021	Single	Diploma	13	Studente/ssa	1	Genitori	0	0			Mattina (6:00-13:00), Pomeriggio (13:00-18:00), Sera (18:00-00:00), Notte (00:00-6:00)	Si, in entrambi i pasti	Si	Si	ghiacceria	Mai	Mai	Thriller, Drama, Avventura, Commedia, Anime, Biografiche, Documentaristiche, Fantascientifiche, Horror, Medical Drama, Crime, Musical, Western, Serie Animate	ac	Televisore, Piattaforme On-Demand (Sky Online, Infinity, Netflix, Mediaset Premium, NowTV, TimVision), Streaming on-line, DVD	Si	Solo	Mattina (6:00-13:00), Pomeriggio (13:00-18:00), Sera (18:00-00:00), Notte (00:00-6:00)	Si, in entrambi i pasti	Mai	Mai	Mai	3	7	r	3						NO_WATCHER	7	9	24	40	47	0	0
462	22	Male	1.7	100	34.6021	Single	Diploma	13	Studente/ssa	1	Genitori	0	0			Mattina (6:00-13:00), Pomeriggio (13:00-18:00), Sera (18:00-00:00), Notte (00:00-6:00)	Si, in entrambi i pasti	Si	Si	ghiacceria	Mai	Mai	Thriller, Drama, Avventura, Commedia, Anime, Biografiche, Documentaristiche, Fantascientifiche, Horror, Medical Drama, Crime, Musical, Western, Serie Animate	ac	Televisore, Piattaforme On-Demand (Sky Online, Infinity, Netflix, Mediaset Premium, NowTV, TimVision), Streaming on-line, DVD	Si	Solo	Mattina (6:00-13:00), Pomeriggio (13:00-18:00), Sera (18:00-00:00), Notte (00:00-6:00)	Si, in entrambi i pasti	Mai	Mai	Mai	3	7	r	3						NO_WATCHER	7	9	24	40	47	0	0
463	23	Male	1.8	75	23.1481	Single	Laurea Triennale	16	Studente/ssa	0	Appartamento Condiviso	1	3	10	0	Sera (18:00-00:00)	No	No	No		Qualche volta																					NO_WATCHER	18	18	24	60	54	12	46
464	23	Male	1.7	70	24.2215	Single	Laurea Triennale	16	Studente/ssa	1	Genitori	1	3	5	1	Mattina (6:00-13:00), Sera (18:00-00:00)	Si, in entrambi i pasti	No	No		Raramente																					NO_WATCHER	20	19	24	63	37	1	38
465	24	Male	1.8	79	24.3827	Fidanzato/a	Laurea Magistrale	18	Lavoro Intellettuale	1	Appartamento Condiviso	0	4	10	1	Sera (18:00-00:00)	Si, in entrambi i pasti	Si	No		Mai																					NO_WATCHER	7	18	14	39	43	6	21
466	24	Male	1.77	74	23.6203	Fidanzato/a	Laurea Magistrale	18	Lavoro Intellettuale	1	Genitori	0	8	3	1	Sera (18:00-00:00)	Si, solo a cena	No	No		Mai																					NO_WATCHER	9	19	22	50	33	3	14
467	24	Male	1.8	70	21.6049	Single	Laurea Triennale	16	Studente/ssa	1	Genitori	1	20	20	1	Sera (18:00-00:00)	No	No	Si	2	Mai	Mai	Fantascientifiche	Breaking bad game of thrones	Televisore	Si	Solo	Sera (18:00-00:00)	No	Mai	Mai	Mai	1	2	2	1						NO_WATCHER	7	9	24	40	47	0	0
468	24	Male	1.8	70	21.6049	Single	Laurea Triennale	16	Studente/ssa	1	Genitori	1	20	20	1	Sera (18:00-00:00)	No	No	Si	2	Mai	Mai	Fantascientifiche	Breaking bad game of thrones	Televisore	Si	Solo	Sera (18:00-00:00)	No	Mai	Mai	Mai	1	2	2	1						NO_WATCHER	7	9	24	40	47	0	0
469	25	Male	1.73	65	21.7181	Fidanzato/a	Laurea Magistrale	18	Studente/ssa	1	Genitori	1	10	6	1	Pomeriggio (13:00-18:00)	Si, solo a pranzo	No	No		Mai																					NO_WATCHER	7	10	18	35	36	1	15
470	25	Male	1.79	90	28.089	Fidanzato/a	Laurea Triennale	16	Lavoro Fisico	1	Genitori	2	0	20	1	Notte (00:00-6:00)	Si, solo a pranzo	Si	No		Qualche volta																					NO_WATCHER	12	13	15	40	30	13	21
471	25	Male	1.8	93	28.7037	Single	Diploma	13	Studente/ssa	0	Genitori	1	0	5	2	Sera (18:00-00:00)	Si, in entrambi i pasti	No	No		Qualche volta																					NO_WATCHER	10	18	18	46	51	16	70
472	25	Male	1.81	92	28.0822	Fidanzato/a	Diploma	13	Lavoro Fisico	1	Genitori	0	0	8	0.5	Sera (18:00-00:00)	Si, solo a cena	No	No		Raramente																					NO_WATCHER	12	13	17	42	38	7	40
473	26	Male	1.86	83	23.9912	Fidanzato/a	Laurea Triennale	18	Studente/ssa	1	Appartamento Condiviso	1	13	15	0	Sera (18:00-00:00), Notte (00:00-6:00)	No	No	No		Raramente																					NO_WATCHER	12	18	13	43	32	2	8
474	28	Male	1.8	75	23.1481	Fidanzato/a	Diploma	13	Lavoro Intellettuale	1	Genitori	1	1	1	1	Sera (18:00-00:00)	No	No	No		Mai																					NO_WATCHER	12	20	23	55	38	2	23
475	29	Male	1.75	80	26.1224	Fidanzato/a	Diploma	13	Lavoro Fisico	1	Genitori	0	2	2	1	Sera (18:00-00:00)	Si, solo a cena	Si	No		Qualche volta																					NO_WATCHER	12	10	11	33	37	17	23
476	29	Male	1.87	80	22.8774	Sposato/a o Convivente	Laurea Magistrale	18	Lavoro Fisico	1	Coniuge (o fidanzato/a)	0	1	0	2	Sera (18:00-00:00)	Si, in entrambi i pasti	No	No		Raramente																					NO_WATCHER	7	9	20	36	24	0	3
477	30	Male	1.83	78	23.2912	Single	Laurea Triennale	16	Studente/ssa	1	Genitori	0	5	5	0	Sera (18:00-00:00)	No	No	No		Mai																					NO_WATCHER	11	12	21	44	60	23	28
478	31	Male	1.77	89	28.4082	Single	Dottorato o Specializzazione	23	Lavoro Intellettuale	1	Genitori	4	10	10	1	Notte (00:00-6:00)	No	Si	Si	1	Mai	Mai	Thriller, Commedia, Horror	Will e grace, gossip girl, America horror story	Piattaforme On-Demand (Sky Online, Infinity, Netflix, Mediaset Premium, NowTV, TimVision)	Si	Solo	Notte (00:00-6:00)	No	Mai	Mai	Mai	2	2	2	1						NO_WATCHER	7	9	24	40	41	6	8
479	31	Male	1.77	89	28.4082	Single	Dottorato o Specializzazione	23	Lavoro Intellettuale	1	Genitori	4	10	10	1	Notte (00:00-6:00)	No	Si	Si	1	Mai	Mai	Thriller, Commedia, Horror	Will e grace, gossip girl, America horror story	Piattaforme On-Demand (Sky Online, Infinity, Netflix, Mediaset Premium, NowTV, TimVision)	Si	Solo	Notte (00:00-6:00)	No	Mai	Mai	Mai	2	2	2	1						NO_WATCHER	7	9	24	40	41	6	8
480	32	Male	1.7	57	19.7232	Fidanzato/a	Laurea Triennale	16	Studente/ssa	1	Appartamento Condiviso	0	12	20	1	Sera (18:00-00:00)	No	No	No		Raramente																					NO_WATCHER	8	13	26	47	40	6	19
481	33	Male	1.8	71	21.9136	Fidanzato/a	Laurea Magistrale	15	Lavoro Intellettuale	1	Solo	1	5	7	1	Mattina (6:00-13:00), Sera (18:00-00:00)	Si, in entrambi i pasti	No	No		Spesso																					NO_WATCHER	14	12	13	39	45	5	30
482	34	Male	1.76	70	22.5981	Single	Laurea Triennale	15	Lavoro Intellettuale	1	Genitori	0	0	20	1	Sera (18:00-00:00)	Si, solo a cena	No	No		Mai																					NO_WATCHER	27	20	25	72	50	0	1
[truncated: 9 more columns]

## Sheet: Legend
BWAQ	Binge Watching Addiction Questionnaire
BDI	Back Depression Inventory
STAI	Stait Trait Anxiety Inventory
LSAS	Liebowitz Social Anxiety Scale
BIS-11	Barratt Impulsiveness Scale-11
